# Supplementary material
Source: PubMed Central journal article supplement (PMC4903023)
Supplement: NIHMS793053-supplement-SI.pdf [file NIHMS793053-supplement-SI.pdf]

## Supporting information

### Efficient Biosynthesis of Fungal Polyketides Containing the Dioxabicyclo-octane Ring System

Xu-Ming Mao<sup>1,2‡</sup>, Zha-Jun Zhan<sup>2,4‡</sup>, Matthew N. Grayson<sup>3</sup>, Man-Cheng Tang<sup>2</sup>, Wei Xu<sup>2</sup>,  
Yong-Quan Li<sup>1</sup>, Wen-Bing Yin<sup>2</sup>, Hsiao-Ching Lin<sup>2</sup>, Yit-Heng Chooi<sup>2</sup>, K. N. Houk<sup>3</sup>, Yi  
Tang<sup>2,3\*</sup>

<sup>1</sup>Zhejiang University, College of Life Sciences, Hangzhou 310058, China, <sup>2</sup>Department of Chemical and Biomolecular Engineering, <sup>3</sup>Department of Chemistry and Biochemistry, University of California, Los Angeles CA90095, USA, <sup>4</sup>Zhejiang University of Technology, College of Pharmaceutical Science, Hangzhou 310014, China

# Table of contents

## Experimental Procedures

|                                                                            |    |
|----------------------------------------------------------------------------|----|
| Strains and culture media                                                  | S4 |
| Plasmid construction                                                       | S4 |
| Construction of <i>C. arbuscula</i> mutants                                | S5 |
| <i>C. arbuscula</i> genomic DNA preparation                                | S5 |
| <i>C. arbuscula</i> RNA preparation and reverse transcription-PCR (RT-PCR) | S5 |
| Yeast reconstitution of aurovertin biosynthesis pathway                    | S6 |
| Intermediate feeding assays                                                | S6 |
| LC/MS analysis of metabolites                                              | S6 |
| Compounds purification                                                     | S6 |
| Computational details                                                      | S8 |

## Supplementary Tables

|                                                                                                 |     |
|-------------------------------------------------------------------------------------------------|-----|
| <b>Table S1.</b> Deduced gene functions within the aurovertin gene cluster.                     | S9  |
| <b>Table S2.</b> Accession numbers of homologs                                                  | S10 |
| <b>Table S3.</b> <i>Calcarisporium arbuscula</i> strains used in this study.                    | S11 |
| <b>Table S4.</b> Primers used in this study.                                                    | S12 |
| <b>Table S5.</b> Plasmids used in this study.                                                   | S13 |
| <b>Table S6.</b> <i>S. cerevisiae</i> strains for aurovertin biosynthetic enzyme expression     | S14 |
| <b>Table S7.</b> NMR spectroscopic data of compounds <b>2–3</b> in CDCl <sub>3</sub>            | S15 |
| <b>Table S8.</b> NMR spectroscopic data of compounds <b>4</b> and <b>1</b> in CDCl <sub>3</sub> | S16 |
| <b>Table S9.</b> NMR spectroscopic data of compounds <b>5, 6</b> in CDCl <sub>3</sub>           | S17 |
| <b>Table S10.</b> NMR spectroscopic data of compounds <b>7</b> and <b>8</b>                     | S18 |
| <b>Table S11.</b> NMR spectroscopic data of compounds <b>9, 10</b> in CDCl <sub>3</sub>         | S19 |

## Supplementary Figures

|                                                                                                      |     |
|------------------------------------------------------------------------------------------------------|-----|
| <b>Figure S1.</b> The homologous gene clusters producing aurovertins and citreoviridin.              | S20 |
| <b>Figure S2.</b> Deletion of <i>aurA</i> gene in <i>C. arbuscula</i>                                | S21 |
| <b>Figure S3.</b> Heterologous expression of AurA in <i>S. cerevisiae</i>                            | S22 |
| <b>Figure S4.</b> Deletion of <i>aurB</i> in <i>C. arbuscula</i> .                                   | S23 |
| <b>Figure S5.</b> Deletion of <i>aurC</i> in <i>C. arbuscula</i> .                                   | S24 |
| <b>Figure S6.</b> Lowest energy conformations of <b>7</b> and <b>8</b> .                             | S25 |
| <b>Figure S7.</b> Isolation chromatography of compound <b>9</b> from <i>C. arbuscula</i>             | S26 |
| <b>Figure S8.</b> Deletion of <i>aurD</i> in <i>C. arbuscula</i> .                                   | S27 |
| <b>Figure S9.</b> HPLC profile of $\Delta$ <i>aurD</i> <i>C. arbuscula</i> strain.                   | S28 |
| <b>Figure S10.</b> Possible epoxide-opening cyclization reactions with a model substrate.            | S29 |
| <b>Figure S11.</b> Base-catalyzed epoxide-opening cyclization reactions.                             | S30 |
| <b>Figure S12.</b> Acid-catalyzed epoxide-opening reactions.                                         | S31 |
| <b>Figure S13.</b> Simultaneous general acid/base catalysis in epoxide-opening cyclization reactions | S32 |
| <b>Figure S14.</b> Deletion of <i>aurG</i> in <i>C. arbuscula</i> .                                  | S33 |
| <b>Figure S15.</b> . Functional verifications of AurG and AurF.                                      | S34 |

|                                                                                                       |     |
|-------------------------------------------------------------------------------------------------------|-----|
| <b>Figure S16.</b> $^1\text{H}$ NMR of aurovertin A ( <b>1</b> ) in $\text{CDCl}_3$ (500 MHz)         | S35 |
| <b>Figure S17.</b> $^{13}\text{C}$ NMR of aurovertin A ( <b>1</b> ) in $\text{CDCl}_3$ (125 MHz)      | S36 |
| <b>Figure S18.</b> $^1\text{H}$ NMR of aurovertin B ( <b>2</b> ) in $\text{CDCl}_3$ (500 MHz)         | S37 |
| <b>Figure S19.</b> $^{13}\text{C}$ NMR of aurovertin B ( <b>2</b> ) in $\text{CDCl}_3$ (125 MHz)      | S38 |
| <b>Figure S20.</b> $^1\text{H}$ NMR of aurovertin D ( <b>3</b> ) in $\text{CDCl}_3$ (500 MHz)         | S39 |
| <b>Figure S21.</b> $^{13}\text{C}$ NMR of aurovertin D ( <b>3</b> ) in $\text{CDCl}_3$ (125 MHz)      | S40 |
| <b>Figure S22.</b> $^1\text{H}$ NMR of aurovertin E ( <b>4</b> ) in $\text{CDCl}_3$ (500 MHz)         | S41 |
| <b>Figure S23.</b> $^1\text{H}$ NMR of aurovertin E ( <b>4</b> ) in $\text{CDCl}_3$ (125 MHz)         | S42 |
| <b>Figure S24.</b> $^1\text{H}$ NMR of aurovertin J ( <b>5</b> ) in $\text{CDCl}_3$ (500 MHz)         | S43 |
| <b>Figure S25.</b> $^{13}\text{C}$ NMR of aurovertin J ( <b>5</b> ) in $\text{CDCl}_3$ (125 MHz)      | S44 |
| <b>Figure S26.</b> $^1\text{H}$ NMR of aurovertin M ( <b>6</b> ) in $\text{CDCl}_3$ (500 MHz)         | S45 |
| <b>Figure S27.</b> $^{13}\text{C}$ NMR of aurovertin M( <b>6</b> ) in $\text{CDCl}_3$ (125 MHz)       | S46 |
| <b>Figure S28.</b> $^1\text{H}$ NMR of compound <b>7</b> in $\text{DMSO-d}_6$ (500 MHz)               | S47 |
| <b>Figure S29.</b> $^{13}\text{C}$ NMR of compound <b>7</b> in $\text{DMSO-d}_6$ (125 MHz)            | S48 |
| <b>Figure S30.</b> $^1\text{H}$ NMR of compound <b>8</b> in $\text{CDCl}_3$ (500 MHz)                 | S49 |
| <b>Figure S31.</b> $^{13}\text{C}$ NMR of compound <b>8</b> in $\text{CDCl}_3$ (125 MHz)              | S50 |
| <b>Figure S32.</b> $^1\text{H}$ $^1\text{H}$ -COSY of compound <b>8</b> in $\text{CDCl}_3$ (500 MHz)  | S51 |
| <b>Figure S33.</b> HSQC of compound <b>8</b> in $\text{CDCl}_3$ (500 MHz)                             | S52 |
| <b>Figure S34.</b> HMBC of compound <b>8</b> in $\text{CDCl}_3$ (500 MHz)                             | S53 |
| <b>Figure S35.</b> NOESY of compound <b>8</b> in $\text{CDCl}_3$ (500 MHz)                            | S54 |
| <b>Figure S36.</b> $^1\text{H}$ NMR of compound <b>9</b> in $\text{CDCl}_3$ (500 MHz)                 | S55 |
| <b>Figure S37.</b> $^{13}\text{C}$ NMR of compound <b>9</b> in $\text{CDCl}_3$ (125 MHz)              | S56 |
| <b>Figure S38.</b> $^1\text{H}$ $^1\text{H}$ -COSY of compound <b>9</b> in $\text{CDCl}_3$ (500 MHz)  | S57 |
| <b>Figure S39.</b> HSQC of compound <b>9</b> in $\text{CDCl}_3$ (500 MHz)                             | S58 |
| <b>Figure S40.</b> HMBC of compound <b>9</b> in $\text{CDCl}_3$ (500 MHz)                             | S59 |
| <b>Figure S41.</b> NOESY of compound <b>9</b> in $\text{CDCl}_3$ (500 MHz)                            | S60 |
| <b>Figure S42.</b> $^1\text{H}$ NMR of compound <b>10</b> in $\text{CDCl}_3$ (500 MHz)                | S61 |
| <b>Figure S43.</b> $^{13}\text{C}$ NMR of compound <b>10</b> in $\text{CDCl}_3$ (125 MHz)             | S62 |
| <b>Figure S44.</b> $^1\text{H}$ $^1\text{H}$ -COSY of compound <b>10</b> in $\text{CDCl}_3$ (500 MHz) | S63 |
| <b>Figure S45.</b> HSQC of compound <b>10</b> in $\text{CDCl}_3$ (500 MHz)                            | S64 |
| <b>Figure S46.</b> HMBC of compound <b>10</b> in $\text{CDCl}_3$ (500 MHz)                            | S65 |
| <b>Figure S47.</b> NOESY of compound <b>10</b> in $\text{CDCl}_3$ (500 MHz)                           | S66 |

### Supplementary Schemes

|                                                                             |     |
|-----------------------------------------------------------------------------|-----|
| <b>Scheme S1.</b> Structures of decurrenside A, sorangicin A and palytoxin. | S67 |
| <b>Scheme S2.</b> Structures of citreoviridin, asteltoxin and asteltoxin B. | S68 |

### Supplementary References

|                                                                      |     |
|----------------------------------------------------------------------|-----|
| <b>Full list of authors in the Gaussian09 reference</b>              | S70 |
| <b>Supplementary Nucleotide and Protein Sequence Data</b>            | S71 |
| <b>Supplementary Computational Data (Cartesian Coordinates, etc)</b> | S81 |

## Experimental Procedures

### Strains and culture media

*Calcarisporium arbuscula* strains in this study were listed in Table S3. *C. arbuscula* was grown in the potato dextrose broth (PDB, Fluka) at 25°C for aurovertin production. Spores were collected from the potato dextrose agar (PDA, PDB + 1.5% agar) medium at 25°C for 6 days. For gene knock-out in *C. arbuscula*, PDA plus 1.2 M sorbitol and 250 µg/ml hygromycin was used for protoplast regeneration and antibiotic resistance selection. *Saccharomyces cerevisiae* strain BJ5464-NpgA (MAT $\alpha$  *ura3-52 his3- $\Delta$ 200 leu2- $\Delta$ 1 trp1 pep4::HIS3 prb1  $\Delta$ 1.6R can1 GAL*) was used for aurovertin biosynthesis pathway reconstitution or yeast expression plasmid construction by *in vivo* homologous recombination.<sup>1</sup> For yeast culture, the rich medium YPD was used for the routine growth of yeast strain BJ5464-NpgA and its derivatives at 30°C. SD-drop out media were used for selection of plasmids transformed into *S. cerevisiae*. For protein expression under *ADH2* promoter (*ADH2p*) and aurovertin biosynthetic pathway reconstitution *in S. cerevisiae*, the appropriate plasmids were introduced into yeast cells as described in Table S4. The yeast transformants were initially grown in the appropriate SD-drop out liquid media and then transferred to the liquid YPD media for further culture for 4 days. LB media were used for *Escherichia coli* culture. *E. coli* strain Topo10 was the host for routine plasmid sub-cloning according to the protocols described.<sup>2</sup>

### Plasmid construction

Primers and plasmids were listed in Table S5 and S6, respectively. Yeast expression plasmids pXW02 (*LEU2* marker), pXW06 (*TRP1* marker) and pXW55 (*URA3* marker)<sup>3</sup> were used for construction of the heterologous expression plasmids for aurovertin biosynthetic enzymes by *in vivo* homologous recombination in yeast. All the enzymes were expressed under a strong promoter *ADH2p*. For polyketide synthase AurA expression, primers aurA F1 + aurA R1, aurA F2 + aurA R2, aurA F3 + aurA R3 were used to amplify three DNA fragments of *aurA* cDNA, and transformed into BJ5464-NpgA with *NdeI/PmlI*-digested pXW55 to create the plasmid pXM01 to express *aurA*. Primers aurB F + aurB R, aurC F + aurC R were used to amplify *aurB* and *aurC*, and co-transformed with *NdeI/PmeI*-digested pXW02, pXW06 backbones to give rise to plasmids pXM02 and pXM03, respectively. Primer aurD F + aurD R, aurG F + aurG R were used to amplify *aurD*, *aurG* cDNA and also co-transformed with *NdeI/PmlI*-digested pXW55 backbone to create plasmids pXM04 and pXM05, respectively. *aurD* expression cassette including *ADH2p* and *ADH2t* was amplified with primers 55 F + 55 R from the plasmid pXM04 and ligated to *EcoRI*-digested pXM03 to create the plasmid pXM06. All the cDNA was amplified from the wild type reverse transcript prepared as described below. Yeast competent cell preparation and transformation were demonstrated with *S.c.* EasyComp Transformation kit (Invitrogen) according to the manufacture's protocols. Yeast plasmids were prepared by Zymoprep™ Yeast Plasmid Miniprep kit (Zymo Research) and transformed into *E. coli* strain Topo10 for propagation.

To construct the plasmids for gene knock-out in *C. arbuscula* based on the split-marker strategy, the plasmid pAN7-1<sup>4</sup> was used as the template to amplify *hph* upstream fragment with primers hph-up F and hph-up R, and *hph* downstream fragment with primers hph-dn F and hph-dn R. Both fragments were digested with *NotI/SacII* and *SacI/NotI*, respectively, and ligated to T-vector pTA2 to generate plasmids pXM11 and pXM12. The upstream DNA fragments of *aurB*,



*aurC*, *aurD* and *aurG* genes were amplified with primer pairs aurB-up F + aurB-up R, aurC-up F + aurC-up R, aurD-up F + aurD-up R and aurG-up F + aurG-up R. All the above PCR products were digested with *Bam*HI/*Not*I and ligated to the *Bam*HI/*Not*I site of pXM11 for plasmids pXM15, pXM17, pXM19 and pXM21, respectively. Meanwhile, the downstream DNA fragments of *aurB*, *aurC*, *aurD* and *aurG* genes were amplified with primer pairs aurB-dn F + aurB-dn R, aurC-dn F + aurC-dn R, aurD-dn F + aurD-dn R, and aurG-dn F + aurG-dn R, digested with *Not*I/*Hind*III and ligated to pXM12 to create plasmids pXM16, pXM18, pXM20 and pXM22, respectively.

### **Construction of *C. arbuscula* mutants**

The entire *aurA* gene was deleted via homologous recombination based on the deletion cassette from the overlap PCR.<sup>5</sup> Primers aurA-up F1, aurA-up R1 and aurA-dn F1, aurA-dn R1 and hph F, hph R were used to amplify *aurA* upstream, downstream homologous regions from fungal genomic DNA and hygromycin resistance gene from plasmid pUCH2-8.<sup>6</sup> After purification of DNA fragments from agarose gel, primers aurA-up F1 and aurA-dn R1 were used to amplify the whole deletion cassette. The PCR product was gel purified and solubilized in STC buffer (1.2 M sorbitol, 10 mM CaCl<sub>2</sub>, 10 mM Tris-HCl, pH 7.5). All other mutants were constructed in *C. arbuscula* based on the hygromycin split-marker strategy.<sup>7</sup> The upstream and downstream split-marker DNA for each gene were amplified with universal primer pair T7p + T3p with the high fidelity DNA polymerase. The PCR products were precipitated with ethanol and dissolved in STC buffer. Split-marker DNA was introduced into *C. arbuscula* by protoplast transformation. *C. arbuscula* spores were collected on PDA (Fluka) for 6 days at 25°C, and induced to young germ tubes in PDB (Fluka) at 25°C for 7 hours with 180 rpm agitation. Mycelia were collected, washed twice with the osmotic medium (1.2 M MgCl<sub>2</sub>, 10 mM sodium phosphate, pH 5.8 ) and resuspended in the enzyme cocktail solution (3 mg/ml Lysing Enzymes, 3 mg/ml Yatalase in osmotic medium) at 30°C for 4 hours. After twice wash with STC buffer, protoplasts were gently mixed with DNA and incubated for 1 hour on ice. 300 µl of PEG 4000 solution (60% PEG 4000, 50 mM CaCl<sub>2</sub>, 50 mM Tris-HCl, pH 7.5) was added to 100 µl of protoplast mixture, incubated at room temperature for 30 min and plated on the regeneration selection medium (PDA, 1.2 M sorbitol, 250 µg/ml hygromycin B). After incubation at room temperature for about 2 weeks, the transformants were inoculated on PDB medium with stationary incubation for about 1 week to confirm the genotype by PCR after preparation of the genomic DNA.

### ***C. arbuscula* genomic DNA preparation**

Mycelia collected from PDB medium were lyophilized on FreeZone Freeze Dry Systems (Labconco) over night and broken up with 1.5 ml microcentrifuge pestles. 700 µl of LETS buffer (10 mM Tris-HCl, pH 8.0, 20 mM EDTA, pH8.0, 0.5% SDS, 0.1 M LiCl) was added to solubilize the lysate, followed by two rounds of extraction with phenol : chloroform : isoamyl alcohol (25 : 24 : 1). Genomic DNA was precipitated from the supernatant with 2 volumes of ethanol. After wash with 70% ethanol and air dry, genomic DNA was solubilized in sterile water.

### ***C. arbuscula* RNA preparation and reverse transcription-PCR (RT-PCR)**

Mycelia of *C. arbuscula* were inoculated in PDB medium for stationary culture at 25°C for 7 days, and collected for lyophilization. The mycelia was grounded after freezing with liquid nitrogen, and solubilized in Trizol (Invitrogen). 1/5 volume of chloroform was added, vortex and

centrifuged at 15000 rpm for 15 min. The supernatant was extracted once again with chloroform. RNA was precipitated from the supernatant with ethanol and resuspended in RNase-free water. Genomic DNA was further removed by digestion with RNase-free DNase I (Ambion). RNA was purified by acid phenol (Ambion) extraction and ethanol precipitation. RNA integrity was confirmed by electrophoresis on the TBE (Tris-boric acid-EDTA) agarose gel, and the concentration was determined by Nanodrop (Thermo Scientific). Reverse transcript was prepared from 500 ng of total RNA by SuperScript® II Reverse Transcriptase (Invitrogen) with random primers as described by the manufacture. PCR was performed with Phusion® High-Fidelity DNA Polymerase (New England Biolabs) in the presence of 25 ng of reverse transcribed RNA. Primers were listed in Table S5.

#### **Yeast reconstitution of aurovertin biosynthesis pathway**

*Saccharomyces cerevisiae* strain BJ5464-NpgA was transformed or co-transformed with appropriate plasmids as described in Table S4. For polyketide synthase product, yeast cells containing plasmid pXM01 were initially cultured in the SD uracil-drop out medium overnight and transferred to 50 ml of liquid YPD medium, with/without 20 mM sodium acetate or 20 mM sodium propionate, for additional 4-day culture. For other yeast strains with co-expression of various enzymes, yeast cells were also initially cultured in the appropriate SD-drop out medium overnight and transferred to 50 ml of liquid YPD medium with 20 mM sodium propionate for further 4 days. Samples about equal to 0.5 ml of culture were loaded for LC/MS analysis.

#### **Intermediate feeding assays**

For feeding of *C. arbuscula* strains with compounds (solubilized in DMSO), spores of *ΔaurA* or *ΔaurC* were inoculated in 10 ml of PDB together with 10 µg/ml compound **2**, **9** or **10** and further cultured for 7 days at 25 °C. The mycelia and medium were extracted for LC/MS analysis. For feeding assays of yeast, BJ5464-NpgA with/without plasmid pXM05 (expressing *aurG*) were inoculated in the appropriate SD-drop out medium overnight, and further cultured in 50 ml of YPD for 3 days. Then the cultures were concentrated to 3 ml and 10 µg/ml compound **4** (final concentration) was added for further culture for 2 days, followed by organic extraction and LC/MS analysis.

#### **LC/MS analysis**

*C. arbuscula* and *S. cerevisiae* cells were extracted with methanol : acetate ethyl (10 : 90). After brief centrifugation, the supernatant organic phase was dried by speed vacuum and solubilized in methanol for LC/MS loading. All LC-MS analyses were performed on a Shimadzu 2020 EVLC-MS (Phenomenex® Luna, 5µ, 2.0 × 100 mm, C18 column) using positive and negative mode electrospray ionization with a linear gradient of 5–95% MeCN-H<sub>2</sub>O in 15 minutes followed by 95% MeCN for 5 minutes with a flow rate of 0.3 mL/min.

#### **Compounds purification**

##### **Chemicals and chemical analysis**

All solvents and other chemicals used were of analytical grade. All LC-MS analyses were performed on a Shimadzu 2020 EVLC-MS (Phenomenex® Luna, 5µ, 2.0 × 100 mm, C18 column) using positive and negative mode electrospray ionization with a linear gradient of 5–95%

MeCN-H<sub>2</sub>O in 15 minutes followed by 95% MeCN for 5 minutes with a flow rate of 0.3 mL/min. <sup>1</sup>H, <sup>13</sup>C and 2D NMR spectra were obtained on Bruker AV500 spectrometer with a 5 mm dual cryoprobe or a Bruker DRX500 spectrometer with a 5 mm broadband probe at the UCLA Molecular Instrumentation Center.

#### **Purification of aurovertin E (4) from *C. arbuscula* $\Delta$ aurG mutant.**

The  $\Delta$ aurG mutant was cultivated on PDB (2 L) at 25°C for 10 d. The culture was filtered through cheesecloth. The mycelium was extracted with acetone for three times. The acetone extract was concentrated *in vacuo* and the resultant aqueous mixture (500 mL) was extracted with CHCl<sub>3</sub> (3 × 400 mL) and concentrated *in vacuo*. The crude products were purified by a Silica gel column (RediSep®, 40 g Flash Column, 8:2→6:4 hexane/acetone gradient) to afford aurovertin E (4) (33 mg). All spectral data for 4 (Table S8, Figure S22-S23) was consistent with that in the literature.<sup>8</sup>

#### **Purification of aurovertins 1-6 and 9 from *C. arbuscula*.**

*C. arbuscula* wild type strain was cultivated on PDB (6 L) at 25 °C for 10 d. The culture was filtered through cheesecloth. The mycelium was extracted with acetone for three times. The combined extracts were evaporated to dryness under reduced pressure to afford the residue (15.6 g). The residue was dissolved in H<sub>2</sub>O (1 L) to form a suspension, which was then extracted with CHCl<sub>3</sub> (4 × 500 mL). The combined organics were dried over MgSO<sub>4</sub> and concentrated *in vacuo*. The crude products (6.0 g) were separated by a RP-18 column (RediSep Rf Gold C18 Column, 20–40μ, 86 g, MeCN-H<sub>2</sub>O 2:8→5:5) to afford four fractions (Fr.1–4). Fr.1 was purified by flash chromatography (MeCN-H<sub>2</sub>O 1:9→3:7) to provide aurovertins D (3) (33 mg) and E (4) (13 mg). Fr.2 was further purified on a semi-preparative RP-18 HPLC column (Luna®, ODS-3, 5 μ, 250 × 10 mm) eluted by MeCN-H<sub>2</sub>O (45:55→55:45) with flowrate of 3.5 mL/min to give aurovertin J (5) (1.1 mg, t<sub>R</sub>:15.9 min) and a subfraction (t<sub>R</sub>: 15.6–16.2 min) containing two compounds with the molecular weight 402. The two compounds can be separated by semi-preparative HPLC column (Luna®, silica gel, 5 μm, 250 × 10 mm) eluted by hexane-acetone (75:25→65:35) with flow rate of 5.0 mL/min (peak1:t<sub>R</sub>:17.6 min; peak2:t<sub>R</sub>:22.1 min, Figure S10a). After separation, normal phase HPLC and LC-MS analysis all showed each peaks contained two same compounds with MW 402 (Figure S10). These showed that the two compounds with MW 402 from wild type can be interchanged quickly. Finally, the two compounds (total 1.3 mg) were checked by mixture NMR, and one of dominant compounds was determined as 9. Aurovertin B (2) (110 mg) was obtained from Fr. 3 by recrystallization with MeCN-H<sub>2</sub>O (9:1). Fr.4 was applied to flash chromatography (MeCN-H<sub>2</sub>O 3:7→5:5) to give aurovertins A (1) (5.0 mg) and M (6) (11.0 mg). All spectral data (Table S7-S9, Figure S16-S27) for 1-6 were consistent with those in the literatures.<sup>8-12</sup> The structure of 9 was determined by 1D and 2D NMR (Table S10, Figure S36-S41).

#### **Purification of compound 10 from yeast cells.**

The yeast strain BJ5464-NpgA + AurABC were cultured in YPD (20 L) supplemented with 20 mM sodium propionate at 30°C for 5 d. The culture was filtered through cheesecloth. The yeast cells were extracted with acetone for three times. The acetone extract was concentrated *in vacuo* and the resultant aqueous mixture (1200 mL) was extracted with CHCl<sub>3</sub> (3 × 600 mL) and concentrated *in vacuo*. The crude products were purified by a RP-18 column (RediSep Rf Gold C18 Column, 20–40μ, 86 g, MeCN-H<sub>2</sub>O 2:8→5:5) to afford four fractions (Fr.1–5). The Fr.3 was separated by a Sephadex LH-20 column (35 × 1.2 cm, MeOH) followed by purification on a semi-preparative RP-18 HPLC column (Luna®, ODS-3, 5 μm, 250 × 10 mm) eluted by MeCN-H<sub>2</sub>O

(15:85→40:60) with flow rate of 3.5 mL/min to yield **10** (1.3 mg, *t*<sub>R</sub>:15.9 min). The structure of **10** was determined by 1D and 2D NMR (Table S10, Figure S42-S47).

#### **Purification of compound 7 from yeast**

The yeast cells expressing AurA were cultured in YPD (10 L) with 20 mM sodium propionate at 30°C for 5 d. The culture was filtered through cheesecloth. The yeast cells were extracted with acetone for three times. The acetone extract was concentrated *in vacuo* and the resultant aqueous mixture (500 mL) was extracted with CHCl<sub>3</sub> (3 × 400 mL) and concentrated *in vacuo*. The crude products were purified by a Silica gel column (RediSep®, 40 g Flash Column, 9:1→7:3 hexane:acetone gradient) to afford compound **7** (31 mg). The structure of **7** was determined by NMR (Table S11, Figure S28-S29).

#### **Purification of compound 8 from yeast.**

The yeast cells expressing AurA and AurB were cultured in YPD (10 L) with 20 mM sodium propionate at 30°C for 5 d. The culture was filtered through cheesecloth. The yeast cells were extracted with acetone for three times. The acetone extract was concentrated *in vacuo* and the resultant aqueous mixture (500 mL) was extracted with CHCl<sub>3</sub> (3 × 400 mL) and concentrated *in vacuo*. The crude products were purified by a Silica gel column (RediSep®, 40 g Flash Column, 9:1→8:2 hexane:acetone gradient) to afford compound **8** (28 mg). The structure of **8** was determined by 1D and 2D NMR (Table S11, Figure S30-S35).

#### **Computational details**

Quantum mechanical calculations were performed using Gaussian 09 (Revision D.01).<sup>13</sup> All geometries were optimized using M06-2X,<sup>14</sup> within the IEFPCM model (water),<sup>15</sup> and the 6-31G(d) basis set. Single point energies were calculated using M06-2X,<sup>14</sup> within the IEFPCM model (water),<sup>15</sup> and the 6-311++G(d,p) basis set. The resulting energies were used to correct the gas phase energies obtained from the M06-2X optimizations.<sup>16-18</sup> Previous computational work on epoxide-opening cyclization reactions with similar methods provided results in accord with experiment.<sup>19</sup> Computed structures are illustrated with CYLView.<sup>20</sup>

## Supplementary Tables

**Table S1.** Deduced gene functions within the *aur* gene cluster.

| Gene name   | Deduced protein function                            | Identity to <i>M. anisopliae</i> homolog |
|-------------|-----------------------------------------------------|------------------------------------------|
| <i>aurA</i> | Polyketide synthase with KS-AT-DH-MT-KR-ACP modules | 75%                                      |
| <i>aurB</i> | SAM-dependent methyl-transferase                    | 76%                                      |
| <i>aurC</i> | flavin-dependent monooxygenase                      | 77%                                      |
| <i>aurD</i> | $\alpha/\beta$ hydrolase                            | 72%                                      |
| <i>aurE</i> | SnoaL-like protein                                  | 45%                                      |
| <i>aurF</i> | Putative DNA-binding protein                        | 45%                                      |
| <i>aurG</i> | O-acyl-transferase                                  | No homolog                               |

**Table S2.** Accession numbers of all *aur* homologs from *C. arbuscula*, *M. anisopliae* and *A. terreus*.

| Gene from<br><i>C. arbuscula</i> | <i>C. arbuscula</i> | Homologs in<br><i>M. anisopliae</i> | Homologs in <i>A. terreus</i><br>NIH2624 |
|----------------------------------|---------------------|-------------------------------------|------------------------------------------|
| <i>aurA</i>                      | KT581574            | EFY96172                            | XP_001218239                             |
| <i>aurB</i>                      | KT581575            | EFY96171                            | XP_001218240                             |
| <i>aurC</i>                      | KT581576            | EFY96168                            | XP_001218242                             |
| <i>aurD</i>                      | KT581577            | EFY96169                            | XP_001218241                             |
| <i>aurE</i>                      | KT581578            | No accession number <sup>a</sup>    | XP_001218243                             |
| <i>aurF</i>                      | KT581579            | EFY96170                            | No homolog nearby                        |
| <i>aurG</i>                      | KT581580            | No homolog nearby                   | No homolog nearby                        |

<sup>a</sup>No *C. arbuscula* AurE homolog in *M. anisopliae* was predicted near the gene cluster in the database. But the homolog was identified after BLAST was run against *Aspergillus nidulans* in Softberry ([linux1.softberry.com/](http://linux1.softberry.com/)) with the query of *M. anisopliae* strain E6 contig00020 (accession number JNNZ01000020) containing the putative *aur* gene cluster.

**Table S3.** *Calcarisporium arbuscula* strains used in this study.

| Strain        | Genotype                                                                 | Reference  |
|---------------|--------------------------------------------------------------------------|------------|
| Wild type     | <i>Calcarisporium arbuscula</i> wild type, NRRL 3705, ATCC® 46034™       | ATCC       |
| $\Delta aurA$ | $\Delta aurA::hph$ , the entire <i>aurA</i> was replaced with <i>hph</i> | This study |
| $\Delta aurB$ | $\Delta aurB::hph$ , the entire <i>aurB</i> was replaced with <i>hph</i> | This study |
| $\Delta aurC$ | $\Delta aurC::hph$ , the entire <i>aurC</i> was replaced with <i>hph</i> | This study |
| $\Delta aurD$ | $\Delta aurD::hph$ , the entire <i>aurD</i> was replaced with <i>hph</i> | This study |
| $\Delta aurG$ | $\Delta aurG::hph$ , the entire <i>aurG</i> was replaced with <i>hph</i> | This study |
| $\Delta aurF$ | $\Delta aurF::hph$ , the entire <i>aurF</i> was replaced with <i>hph</i> | This study |

**Table S4.** *S. cerevisiae* strains for aurovertin biosynthetic enzyme expression

| Genotype                                                      | Description                                              |
|---------------------------------------------------------------|----------------------------------------------------------|
| Yeast + <i>aurA</i>                                           | <i>S. cerevisiae</i> BJ5464-NpgA + pXM01                 |
| Yeast + <i>aurA</i> + <i>aurB</i>                             | <i>S. cerevisiae</i> BJ5464-NpgA + pXM01 + pXM02         |
| Yeast + <i>aurA</i> + <i>aurC</i>                             | <i>S. cerevisiae</i> BJ5464-NpgA + pXM01 + pXM03         |
| Yeast + <i>aurA</i> + <i>aurB</i> + <i>aurC</i>               | <i>S. cerevisiae</i> BJ5464-NpgA + pXM01 + pXM02 + pXM03 |
| Yeast + <i>aurA</i> + <i>aurB</i> + <i>aurC</i> + <i>aurD</i> | <i>S. cerevisiae</i> BJ5464-NpgA + pXM01 + pXM02 + pXM06 |
| Yeast + <i>aurG</i>                                           | <i>S. cerevisiae</i> BJ5464-NpgA + pXM05                 |



**Table S5.** Primers used in this study.

| Name       | Sequence                                                     |
|------------|--------------------------------------------------------------|
| aurA-up F1 | GGGGAGATTAAAGGTGAGGC                                         |
| aurA-up R1 | GATGAGCGCATTGTTAGATTTATACACGGTGCCTGGAGAGAAATGTCGATGAGAAC     |
| aurA-dn F1 | CATGATGTCAGGCCATTTTCATATGGCAATGCGCAGGTTGTAGGTGGTCGGTCAAC     |
| aurA-dn R1 | GAAGGAGTGGGTTGATGAAG                                         |
| hph F      | GCACCGTGTATGAAATCTAAC                                        |
| hph R      | ACCTGCGCATTGCCATATG                                          |
| hph-up F   | ACCTGGCGGCCGCTACAACGACCATCAAAGTC                             |
| hph-up R   | ACTGACCGCGGTACCGTCTGCTGCTCCATACAA                            |
| hph-dn F   | CAGGGAGCTCGGTACCTCGGAGGGCGAAGAATC                            |
| hph-dn R   | GAATGCGGCCGCGAGGATTACCTCTAAACAAGTG                           |
| aurB-up F  | CGGTACGACCTTGTCTAATC                                         |
| aurB-up R  | GAATAGCGGCCGCTTGAGAGTGAGGTTGTTG                              |
| aurB-dn F  | GAATAGCGGCCGCTGGACAAAGACATCATAAC                             |
| aurB-dn R  | TATTGAAGCTTGAATGAACTACAGTAAGAG                               |
| aurC-up R  | GAATAGCGGCCGCTCCAGTTGGTCCTTCTGAG                             |
| aurC-dn F  | GATGTGCGGCCGCGAGCCTTGCTATCAACTATG                            |
| aurD-up F  | TATTAGGATCCACAGATTACGAGAATGAAG                               |
| aurD-up R  | GAATAGCGGCCGCTTTGGGAGAGGGAAGAAA                              |
| aurD-dn F  | TATTGAAGCTTAGTGGTGAGGAGATGAGG                                |
| aurD-dn R  | GAATAGCGGCCGCTCTTCCAAGACGATGTTG                              |
| aurG-up F  | TATTAGGATCCGTGCCATCAGACATTAC                                 |
| aurG-up R  | GAATAGCGGCCGCAAACGACGAGGACCAGC                               |
| aurG-dn F  | CTCTAGCGGCCGCTGTGGTTTCTCTGGACATC                             |
| aurG-dn R  | TATCTAAGCTTTGGTTCACGCACTCATTG                                |
| aurA F1    | ATGGCTAGCGATTATAAGGATGATGATGATAAGACTAGTCCACCTAACAAACATGACACC |
| aurA R1    | TCGGAATAGCGTTTCAATACC                                        |
| aurA F2    | GGAAAATACCGAAGGAGAGTG                                        |
| aurA R2    | CCATGTCTGCTAAACACAATG                                        |
| aurA F3    | TAACAGACAAGACCTCGTATC                                        |
| aurA R3    | ATTTAAATTAGTGATGGTGATGGTGATGCACGTGCCTCTTACGTTTGAATGAG        |
| aurB F     | ATCAACTATCAACTATTAATACTATATCGTAATACCATATGATCATGACCAAAGAATC   |
| aurB R     | GATAATGAAAATAATAATCGTGAAGGCATGTTTAAACCTCACCTATCAATGTCTGG     |
| aurC F     | ATCAACTATCAACTATTAATACTATATCGTAATACCATATGGGAGCGTATTCATTG     |
| aurC R     | TTGATAATGGAAAATAATAATCGTGAAGGCATGTTTAAACTCAGAAGGACCAACTG     |
| aurD F     | ATGGCTAGCGATTATAAGGATGATGATGATAAGACTAGTATGGCCTGGTACGACGAG    |
| aurD R     | ATTTAAATTAGTGATGGTGATGGTGATGCACGTGTTTGTCTTTTCTTTAGCAC        |
| aurG F     | ATGGCTAGCGATTATAAGGATGATGATGATAAGACTAGTCTCTGGCTGGTGGTCTGG    |
| aurG R     | ATTTAAATTAGTGATGGTGATGGTGATGCACGTGTTGGACATGGCGACTCTG         |
| 55 F       | TATTAGAATTCGTAGGGGGCAAACAACCG                                |
| 55 R       | CGAAAGGGGGATGTGCTG                                           |
| T7p        | ATACGACTCACTATAGGGC                                          |

|     |                  |
|-----|------------------|
| T3p | TAACCCTCACTAAAGG |
|-----|------------------|

**Table S6.** Plasmids used in this study.

| Plasmid name | Description                                                                                  | Reference    |
|--------------|----------------------------------------------------------------------------------------------|--------------|
| pXW02        | <i>E. coli</i> -yeast shuttle expression vector, <i>ADH2p</i> , 2 $\mu$ , <i>LEU2</i> marker | <sup>3</sup> |
| pXW06        | <i>E. coli</i> -yeast shuttle expression vector, <i>ADH2p</i> , 2 $\mu$ , <i>TRP1</i> marker | <sup>3</sup> |
| pXW55        | <i>E. coli</i> -yeast shuttle expression vector, <i>ADH2p</i> , 2 $\mu$ , <i>URA3</i> marker | <sup>3</sup> |
| pXM01        | <i>aurA</i> cDNA cloned in <i>NdeI/PmlI</i> -digested pXW55                                  | This study   |
| pXM02        | <i>aurB</i> cDNA cloned in <i>NdeI/PmeI</i> -digested pXW02                                  | This study   |
| pXM03        | <i>aurC</i> cDNA cloned in <i>NdeI/PmeI</i> -digested pXW06                                  | This study   |
| pXM04        | <i>aurD</i> cDNA cloned in <i>NdeI/PmlI</i> -digested pXW55                                  | This study   |
| pXM05        | <i>aurG</i> cDNA cloned in <i>NdeI/PmlI</i> -digested pXW55                                  | This study   |
| pXM06        | <i>aurD</i> expression cassette ligated to pXM03 at <i>EcoRI</i> site                        | This study   |
| pTA2         | <i>E. coli</i> T-vector                                                                      | Toyobo       |
| pAN7-1       | <i>E. coli</i> plasmid vector with hygromycin resistance gene <i>hph</i>                     | <sup>4</sup> |
| pXM11        | <i>hph</i> upstream 1.9 kb fragment cloned in <i>NotI/SacI</i> site of pTA2                  | This study   |
| pXM12        | <i>hph</i> downstream 1.8 kb fragment cloned in <i>SacI/NotI</i> site of pTA2                | This study   |
| pXM15        | <i>aurB</i> upstream 1.8 kb cloned in <i>BamHI/NotI</i> site of pXM11                        | This study   |
| pXM16        | <i>aurB</i> downstream 4.2 kb cloned in <i>NotI/HindIII</i> site of pXM12                    | This study   |
| pXM17        | <i>aurC</i> upstream 3.6 kb cloned in <i>BamHI/NotI</i> site of pXM11                        | This study   |
| pXM18        | <i>aurC</i> downstream 1.5 kb cloned in <i>NotI/HindIII</i> site of pXM12                    | This study   |
| pXM19        | <i>aurD</i> upstream cloned in <i>BamHI/NotI</i> site of pXM11                               | This study   |
| pXM20        | <i>aurD</i> upstream cloned in <i>BamHI/NotI</i> site of pXM12                               | This study   |
| pXM21        | <i>aurG</i> upstream 1.2 kb cloned in <i>BamHI/NotI</i> site of pXM11                        | This study   |
| pXM22        | <i>aurG</i> downstream 2.5 kb cloned in <i>NotI/HindIII</i> site of pXM12                    | This study   |

**Table S7.** NMR spectroscopic data of compounds **2–3** in CDCl<sub>3</sub>

| Position | <b>2</b>                                   |                     | <b>3</b>                                   |                     |
|----------|--------------------------------------------|---------------------|--------------------------------------------|---------------------|
|          | $\delta_{\text{H}}$ (mult, <i>J</i> in Hz) | $\delta_{\text{C}}$ | $\delta_{\text{H}}$ (mult, <i>J</i> in Hz) | $\delta_{\text{C}}$ |
| 1        | 1.07 (3H, t, 7.5)                          | 11.8                | 1.37 (3H, t, 6.5)                          | 22.9                |
| 2        | 1.67 (2H, m)                               | 20.1                | 4.23 (1H, m)                               | 65.3                |
| 3        | 3.90 (1H, dd, 8.5, 4.0)                    | 85.5                | 3.76 (1H, d, 7.5)                          | 86.8                |
| 4        | -                                          | 82.7                | -                                          | 83.1                |
| 5        | 4.79 (1H, s)                               | 80.5                | 4.78 (1H, s)                               | 81.1                |
| 6        | -                                          | 83.4                | -                                          | 83.5                |
| 7        | 3.28 (1H, t, 7.5)                          | 76.4                | 3.31 (1H, t, 8.5)                          | 76.3                |
| 8        | 4.13 (1H, t, 7.5)                          | 78.0                | 4.14 (1H, t, 8.0)                          | 78.0                |
| 9        | 5.91 (1H, dd, 15.0, 6.5)                   | 134.1               | 5.90 (1H, dd, 15.0, 7.5)                   | 133.9               |
| 10       | 6.43 (1H, m)                               | 131.7               | 6.44 (1H, m)                               | 131.7               |
| 11       | 6.48 (1H, m)                               | 137.0               | 6.47 (1H, m)                               | 136.9               |
| 12       | 6.38 (1H, m)                               | 132.1               | 6.38 (1H, m)                               | 132.2               |
| 13       | 7.15 (1H, dd, 15.0, 11.5)                  | 135.7               | 7.16 (1H, dd, 16.0, 11.0)                  | 135.6               |
| 14       | 6.34 (1H, d, 15.0)                         | 119.6               | 6.33 (1H, d, 15.0)                         | 119.7               |
| 15       | -                                          | 154.3               | -                                          | 154.3               |
| 16       | -                                          | 108.1               | -                                          | 108.2               |
| 17       | -                                          | 169.9               | -                                          | 169.9               |
| 18       | 5.48 (1H, s)                               | 88.8                | 5.48 (1H, s)                               | 88.8                |
| 19       | -                                          | 163.7               | -                                          | 163.8               |
| 20       | 1.18 (3H, s)                               | 16.4                | 1.37 (3H, s)                               | 17.7                |
| 21       | 1.25 (3H, s)                               | 15.1                | 1.24 (3H, s)                               | 15.0                |
| 22       | 1.96 (3H, s)                               | 8.9                 | 1.95 (3H, s)                               | 8.9                 |
| OMe      | 3.80 (3H, s)                               | 56.4                | 3.82 (3H, s)                               | 56.2                |
| Ac       | 2.15 (3H, s)                               | 20.8                | 2.15 (3H, s)                               | 20.8                |
| Ac       | -                                          | 170.6               | -                                          | 170.6               |

**Table S8.** NMR spectroscopic data of compounds **4** and **1** in CDCl<sub>3</sub>

| Position | <b>4</b>                                   |                     | <b>1</b>                                   |                     |
|----------|--------------------------------------------|---------------------|--------------------------------------------|---------------------|
|          | $\delta_{\text{H}}$ (mult, <i>J</i> in Hz) | $\delta_{\text{C}}$ | $\delta_{\text{H}}$ (mult, <i>J</i> in Hz) | $\delta_{\text{C}}$ |
| 1        | 1.06 (3H, t, 7.5)                          | 11.9                | 1.08 (3H, t, 6.5)                          | 11.8                |
| 2        | 1.65 (2H, m)                               | 20.3                | 1.67 (1H, m)                               | 20.0                |
| 3        | 3.96 (1H, dd, 8.5, 4.5)                    | 84.8                | 3.92 (1H, dd, 8.5, 4.5)                    | 85.5                |
| 4        | -                                          | 83.7                | -                                          | 82.6                |
| 5        | 3.45 (1H, s)                               | 80.4                | 4.89 (1H, s)                               | 80.6                |
| 6        | -                                          | 84.1                | -                                          | 83.0                |
| 7        | 3.15 (1H,brs)                              | 76.4                | 4.79 (1H, d, 8.5)                          | 76.3                |
| 8        | 4.12 (1H, t, 7.5)                          | 77.9                | 4.32 (1H, t, 7.5)                          | 78.0                |
| 9        | 5.90 (1H, dd, 14.0, 6.0)                   | 135.0               | 5.73 (1H, dd, 15.0, 7.0)                   | 132.9               |
| 10       | 6.39 (1H, m)                               | 131.5               | 6.41 (1H, m)                               | 132.4               |
| 11       | 6.45 (1H, m)                               | 137.4               | 6.45 (1H, m)                               | 136.6               |
| 12       | 6.35 (1H, m)                               | 131.9               | 6.33 (1H, m)                               | 132.5               |
| 13       | 7.14 (1H, dd, 15.0, 10.5)                  | 135.8               | 7.15 (1H, dd, 15.0, 11.0)                  | 135.4               |
| 14       | 6.32 (1H, d, 15.0)                         | 119.4               | 6.31 (1H, d, 15.0)                         | 119.9               |
| 15       | -                                          | 154.4               | -                                          | 154.2               |
| 16       | -                                          | 108.2               | -                                          | 108.2               |
| 17       | -                                          | 170.8               | -                                          | 169.6               |
| 18       | 5.50 (1H, s)                               | 88.7                | 5.48 (1H, s)                               | 89.0                |
| 19       | -                                          | 164.0               | -                                          | 163.6               |
| 20       | 1.27 (3H, s)                               | 16.5                | 1.12 (3H, s)                               | 16.3                |
| 21       | 1.36 (3H, s)                               | 14.6                | 1.18 (3H, s)                               | 15.1                |
| 22       | 1.96 (3H, s)                               | 8.9                 | 1.95 (3H, s)                               | 8.9                 |
| OMe      | 3.82 (3H, s)                               | 56.3                | 3.82 (3H, s)                               | 56.2                |
| 5-Ac     |                                            |                     | 2.12 (3H, s)                               | 20.8                |
| 5-Ac     |                                            |                     | -                                          | 170.5               |
| 7-Ac     |                                            |                     | 2.04 (3H, s)                               | 20.8                |
| 7-Ac     |                                            |                     | -                                          | 169.8               |

**Table S9.** NMR spectroscopic data of compounds **5**, **6** in CDCl<sub>3</sub>

| Position | <b>5</b>                              |                     | <b>6</b>                              |                     |
|----------|---------------------------------------|---------------------|---------------------------------------|---------------------|
|          | $\delta_{\text{H}}$ (mult, $J$ in Hz) | $\delta_{\text{C}}$ | $\delta_{\text{H}}$ (mult, $J$ in Hz) | $\delta_{\text{C}}$ |
| 1        | 1.06 (3H, t, 7.5)                     | 11.8                | 1.08 (3H, t, 7.5)                     | 11.8                |
| 2        | 1.70 (2H, m)                          | 20.2                | 1.66 (2H, m)                          | 20.2                |
| 3        | 3.90 (1H, dd, 8.5, 4.5)               | 85.5                | 3.90 (1H, dd, 8.0, 5.0)               | 85.6                |
| 4        | -                                     | 82.7                | -                                     | 82.8                |
| 5        | 4.79 (1H, s)                          | 80.5                | 4.81 (1H, s)                          | 80.3                |
| 6        | -                                     | 83.4                | -                                     | 83.4                |
| 7        | 3.24 (1H, t, 7.5)                     | 76.4                | 3.29 (1H, t, 8.0)                     | 76.4                |
| 8        | 4.11 (1H, t, 7.5)                     | 77.9                | 4.12 (1H, t, 8.0)                     | 78.0                |
| 9        | 5.92 (1H, dd, 15.0, 6.5)              | 134.5               | 5.92 (1H, dd, 15.0, 8.0)              | 134.1               |
| 10       | 6.43 (1H, m)                          | 131.5               | 6.44 (1H, m)                          | 131.7               |
| 11       | 6.48 (1H, m)                          | 137.7               | 6.49 (1H, m)                          | 137.0               |
| 12       | 6.38 (1H, m)                          | 131.5               | 6.39 (1H, m)                          | 132.1               |
| 13       | 7.13 (1H, dd, 15.0, 11.5)             | 136.0               | 7.16 (1H, dd, 16.0, 10.0)             | 135.7               |
| 14       | 6.02 (1H, d, 15.0)                    | 122.0               | 6.33 (1H, d, 15.0)                    | 119.6               |
| 15       | -                                     | 158.6               | -                                     | 154.3               |
| 16       | -                                     | 101.0               | -                                     | 108.1               |
| 17       | -                                     | 169.8               | -                                     | 170.6               |
| 18       | 5.48 (1H, s)                          | 88.7                | 5.50 (1H, s)                          | 88.9                |
| 19       | -                                     | 164.0               | -                                     | 163.6               |
| 20       | 1.16 (3H, s)                          | 16.5                | 1.18 (3H, s)                          | 16.4                |
| 21       | 1.23 (3H, s)                          | 15.1                | 1.27 (3H, s)                          | 15.0                |
| 22       | -                                     | -                   | 1.97 (3H, s)                          | 8.9                 |
| OMe      | 3.79 (3H, s)                          | 55.9                | 3.82 (3H, s)                          | 56.2                |
| Ac       | 2.13 (3H, s)                          | 20.8                |                                       |                     |
| Ac       | -                                     | 171.0               |                                       |                     |
| Pr       |                                       |                     | 1.19 (3H, t, 7.5)                     | 9.3                 |
| Pr       |                                       |                     | 2.44 (2H, q, 7.5)                     | 27.6                |
| Pr       |                                       |                     | -                                     | 173.3               |

**Table S10.** NMR spectroscopic data of compounds **7** and **8**

| Position | <b>8</b> <sup>a</sup>                      |                     | <b>7</b> <sup>b</sup>                      |                     |
|----------|--------------------------------------------|---------------------|--------------------------------------------|---------------------|
|          | $\delta_{\text{H}}$ (mult, <i>J</i> in Hz) | $\delta_{\text{C}}$ | $\delta_{\text{H}}$ (mult, <i>J</i> in Hz) | $\delta_{\text{C}}$ |
| 1        | 1.00 (3H, t, 8.0)                          | 14.0                | 0.97 (3H, t, 7.5)                          | 13.9                |
| 2        | 2.13 (2H, m)                               | 21.7                | 2.10 (2H, m)                               | 21.2                |
| 3        | 5.44 (1H, t, 7.5)                          | 135.1               | 5.45 (1H, t, 7.5)                          | 134.7               |
| 4        | -                                          | 132.3               | -                                          | 132.2               |
| 5        | 6.00 (1H, s)                               | 138.0               | 6.03 (1H, s)                               | 138.1               |
| 6        | -                                          | 132.9               | -                                          | 132.7               |
| 7        | 6.38 (1H, d, 15.5)                         | 141.2               | 6.41 (1H, d, 15.0)                         | 140.5               |
| 8        | 6.28 (1H, m)                               | 127.2               | 6.48 (1H, m)                               | 127.7               |
| 9        | 6.45 (1H, dd, 14.5, 10.5)                  | 137.0               | 6.62 (1H, dd, 15.5, 11.5)                  | 137.4               |
| 10       | 6.34 (1H, m)                               | 130.8               | 6.50 (1H, m)                               | 132.0               |
| 11       | 6.54 (1H, dd, 14.5, 12.0)                  | 138.6               | 6.67 (1H, dd, 15.5, 12.0)                  | 134.9               |
| 12       | 6.31 (1H, m)                               | 131.3               | 6.44 (1H, m)                               | 131.4               |
| 13       | 7.21 (1H, dd, 15.0, 11.5)                  | 136.1               | 6.98 (1H, dd, 15.5, 10.5)                  | 136.4               |
| 14       | 6.32 (1H, d, 15.0)                         | 118.5               | 6.38 (1H, d, 15.0)                         | 119.8               |
| 15       | -                                          | 154.7               | -                                          | 154.7               |
| 16       | -                                          | 107.6               | -                                          | 108.2               |
| 17       | -                                          | 170.6               | -                                          | 169.8               |
| 18       | 5.48 (1H, s)                               | 88.6                | 5.36 (1H, s)                               | 89.8                |
| 19       | -                                          | 163.8               | -                                          | 162.1               |
| 20       | 1.80 (3H, s)                               | 16.8                | 1.78 (3H, s)                               | 16.6                |
| 21       | 1.94 (3H, s)                               | 13.9                | 1.89 (3H, s)                               | 13.7                |
| 22       | 1.95 (3H, s)                               | 8.9                 | 1.90 (3H, s)                               |                     |
| OMe      | 3.82 (3H, s)                               | 56.1                |                                            | 8.7                 |

<sup>a</sup> measured in CDCl<sub>3</sub>; <sup>b</sup> measured in DMSO-d<sub>6</sub>;

**Table S11.** NMR spectroscopic data of compounds **9**, **10** in CDCl<sub>3</sub>

| Position | <b>9</b>                                   |                     | <b>10</b>                                  |                     |
|----------|--------------------------------------------|---------------------|--------------------------------------------|---------------------|
|          | $\delta_{\text{H}}$ (mult, <i>J</i> in Hz) | $\delta_{\text{C}}$ | $\delta_{\text{H}}$ (mult, <i>J</i> in Hz) | $\delta_{\text{C}}$ |
| 1        | 1.05 (3H, t, 7.5)                          | 11.6                | 1.10 (3H, t, 7.5)                          | 11.3                |
| 2        | 1.56 (2H, m)                               | 21.5                | 1.55 (2H, m)                               | 21.3                |
| 3        | 3.68 (1H, dd, 8.0, 5.0)                    | 85.0                | 3.54 (1H, m)                               | 84.8                |
| 4        | -                                          | 81.8                | -                                          | 81.1                |
| 5        | 3.79 (1H, brs)                             | 85.2                | 3.75 (1H, m)                               | 86.6                |
| 6        | -                                          | 83.5                | -                                          | 83.7                |
| 7        | 5.97 (1H, d, 15.0)                         | 142.0               | 5.85 (1H, d, 14.0)                         | 135.9               |
| 8        | 6.46 (1H, m)                               | 127.6               | 6.44 (1H, m)                               | 129.5               |
| 9        | 6.32 (1H, m)                               | 135.0               | 6.40 (1H, m)                               | 134.9               |
| 10       | 6.31 (1H, m)                               | 132.1               | 6.32 (1H, m)                               | 131.9               |
| 11       | 6.48 (1H, m)                               | 138.1               | 6.52 (1H, dd, 15.5, 11.5)                  | 137.9               |
| 12       | 6.32 (1H, m)                               | 133.0               | 6.37 (1H, m)                               | 132.7               |
| 13       | 7.18 (1H, dd, 16.0, 11.0)                  | 136.0               | 7.21 (1H, dd, 16.0, 11.0)                  | 135.9               |
| 14       | 6.34 (1H, d, 15.0)                         | 119.4               | 6.34 (1H, d, 15.0)                         | 119.2               |
| 15       | -                                          | 154.6               | -                                          | 154.4               |
| 16       | -                                          | 108.2               | -                                          | 108.0               |
| 17       | -                                          | 170.8               | -                                          | 170.6               |
| 18       | 5.46 (1H, s)                               | 88.8                | 5.49 (1H, s)                               | 88.8                |
| 19       | -                                          | 163.9               | -                                          | 163.7               |
| 20       | 1.22 (3H, s)                               | 18.4                | 1.21 (3H, s)                               | 19.2                |
| 21       | 1.28 (3H, s)                               | 21.5                | 1.46 (3H, s)                               | 27.7                |
| 22       | 1.95 (3H, s)                               | 9.1                 | 1.96 (3H, s)                               | 8.9                 |
| OMe      | 3.80 (3H, s)                               | 56.4                | 3.82 (3H, s)                               | 56.2                |

## Supplementary Figures

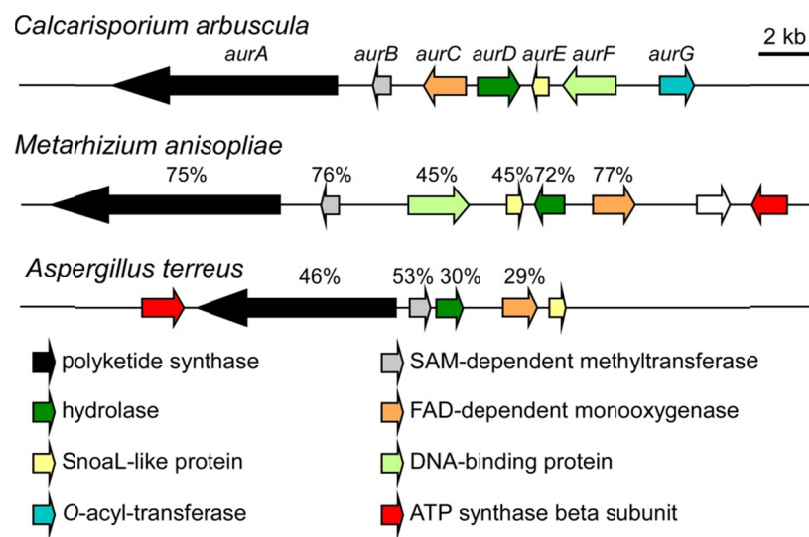

**Figure S1.** The homologous gene clusters among fungi producing aurovertins (*C. arbuscula* and *M. anisopliae*) and citreoviridin (*A. terreus*). The identity of each homolog to the *C. arbuscula* counterpart is shown.



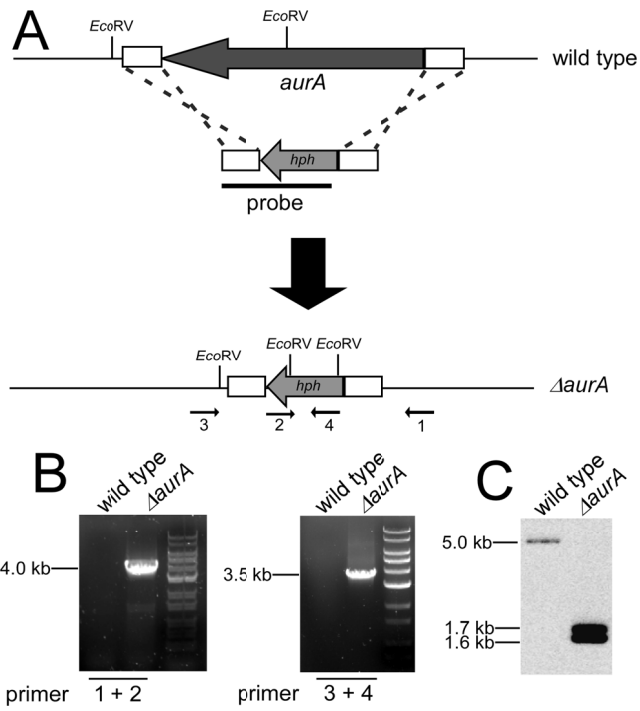

**Figure S2.** Deletion of the entire *aurA* gene in *C. arbuscula*. The genotype was confirmed by PCR and Southern blot.

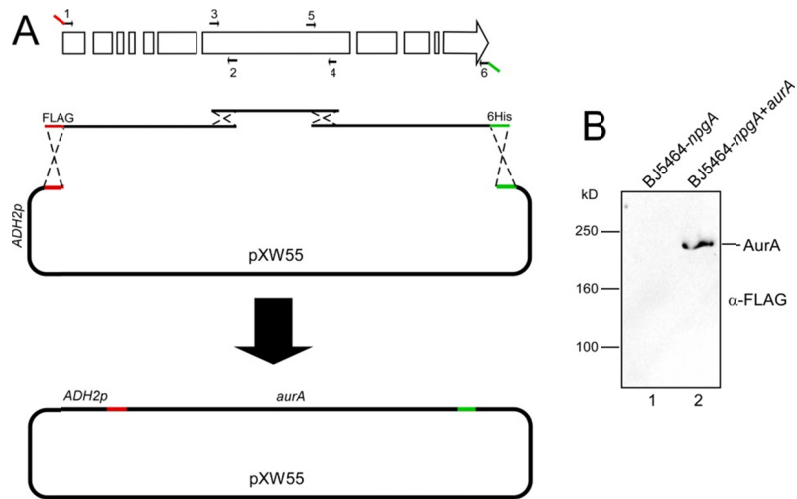

**Figure S3.** Heterologous expression of AurA in *S. cerevisiae* confirmed by Western blot.

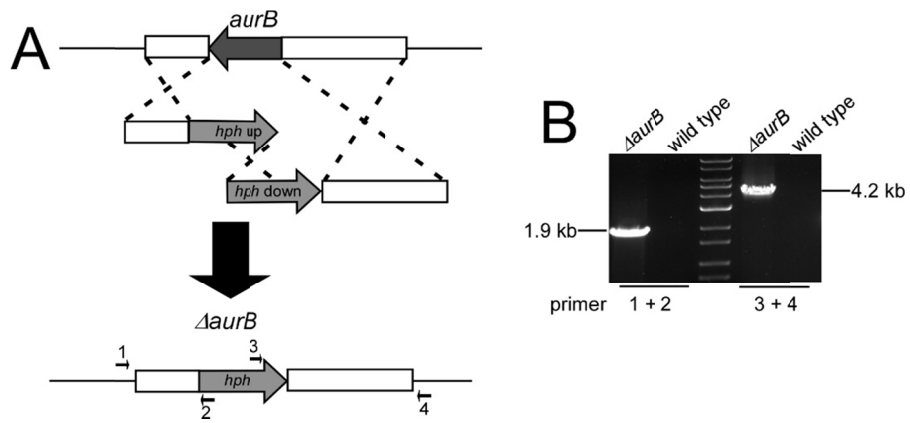

**Figure S4.** Deletion of *aurB* in *C. arbuscula*. The genotype was confirmed by PCR with primers as indicated.

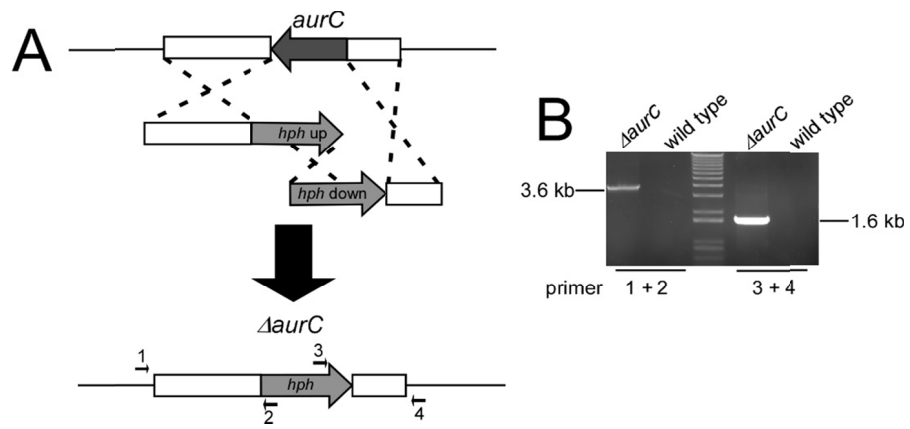

**Figure S5.** Deletion of *aurC* in *C. arbuscula*. The genotype was confirmed by PCR with primers as indicated.



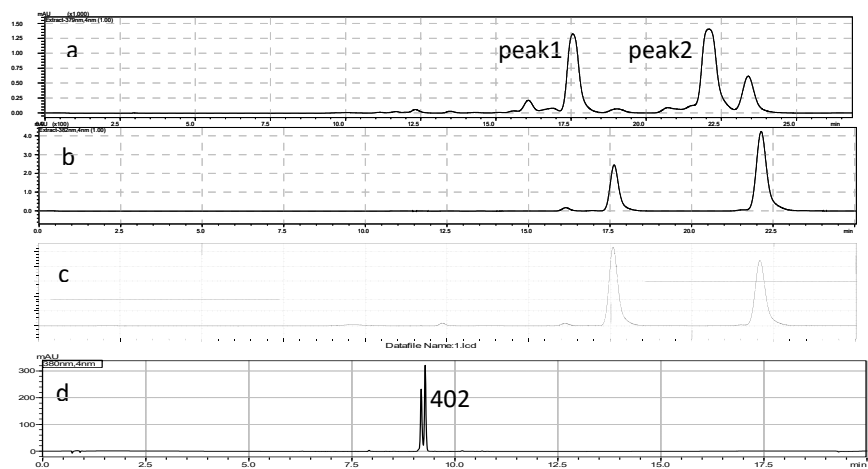

**Figure S7.** Compound **9** exists as an equilibrium of two forms. a: Semi-purified compound **9** from *C. arbuscula*; b: peak 1 checked by normal phase HPLC after purification; c: peak 2 checked by normal phase HPLC after purification; d: LC-MS spectrum  $m/z$   $[M+H]^+ = 403$  ion after purification.

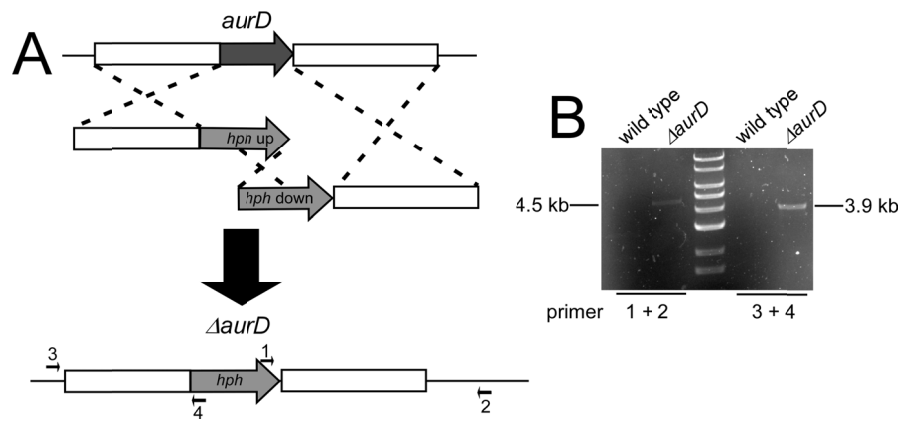

**Figure S8.** Deletion of *aurD* in *C. arbuscula*. The genotype was confirmed by PCR with primers as indicated.

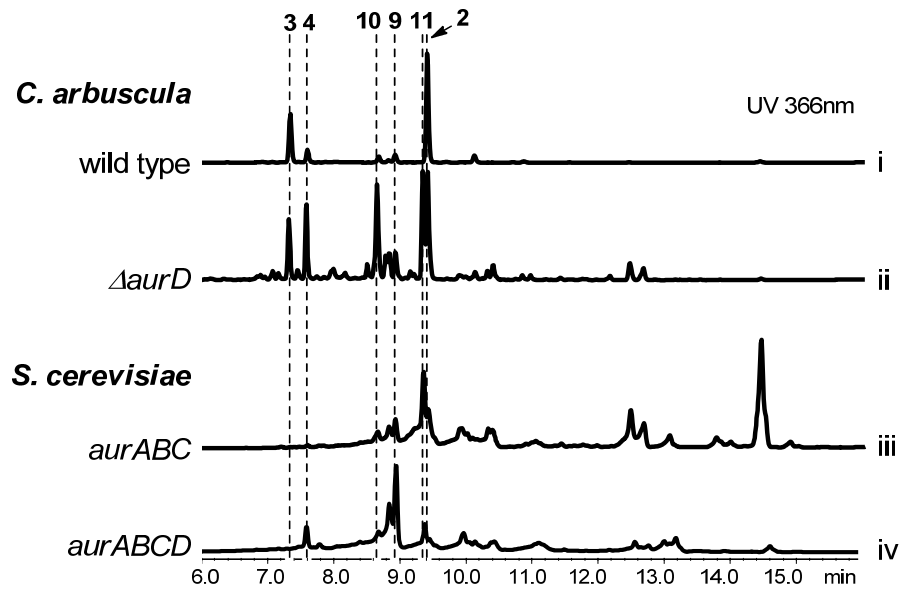

Figure S9. HPLC profile of  $\Delta aurD$  *C. arbuscula* strain.



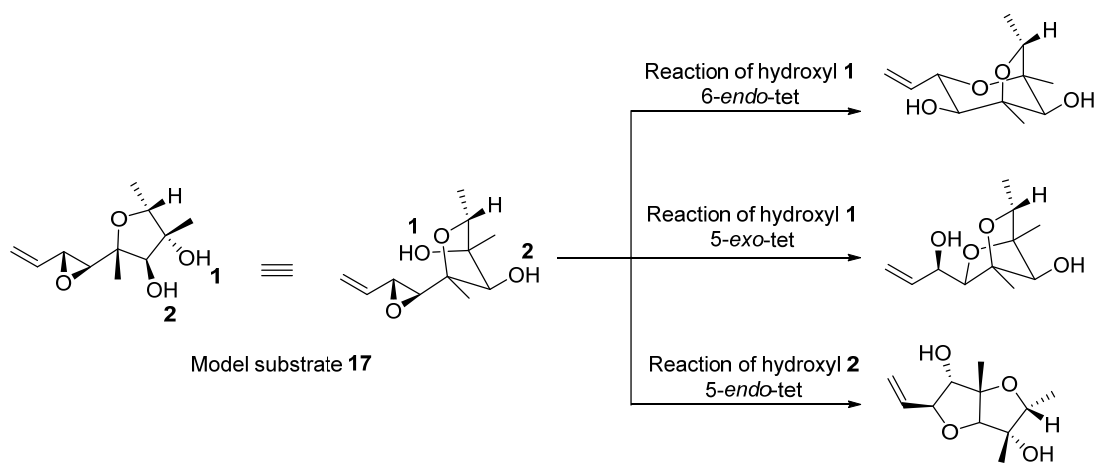

**Figure S10.** Possible epoxide-opening cyclization reactions with a model substrate.

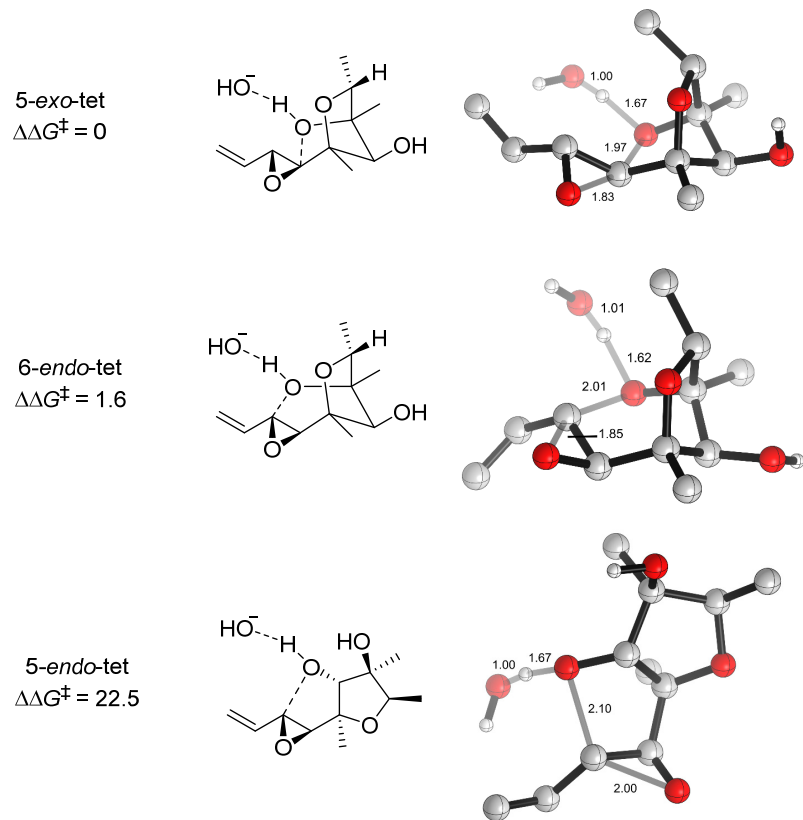

**Figure S11.** Base-catalyzed epoxide-opening cyclization reactions. M06-2X/6-311++G(d,p)-IEFPCM(water)//M06-2X/6-31G(d)-IEFPCM(water). Non-critical hydrogen atoms omitted for clarity. All energies in kcal mol<sup>-1</sup>.

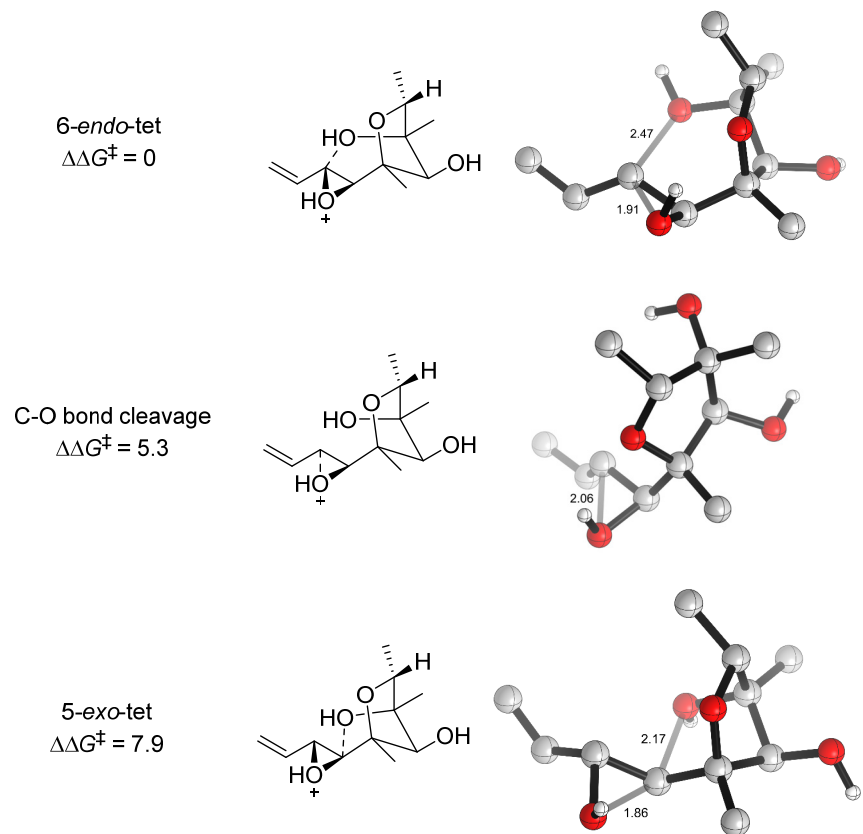

**Figure S12.** Acid-catalyzed epoxide-opening reactions. Non-critical hydrogen atoms omitted for clarity. All energies in  $\text{kcal mol}^{-1}$ .

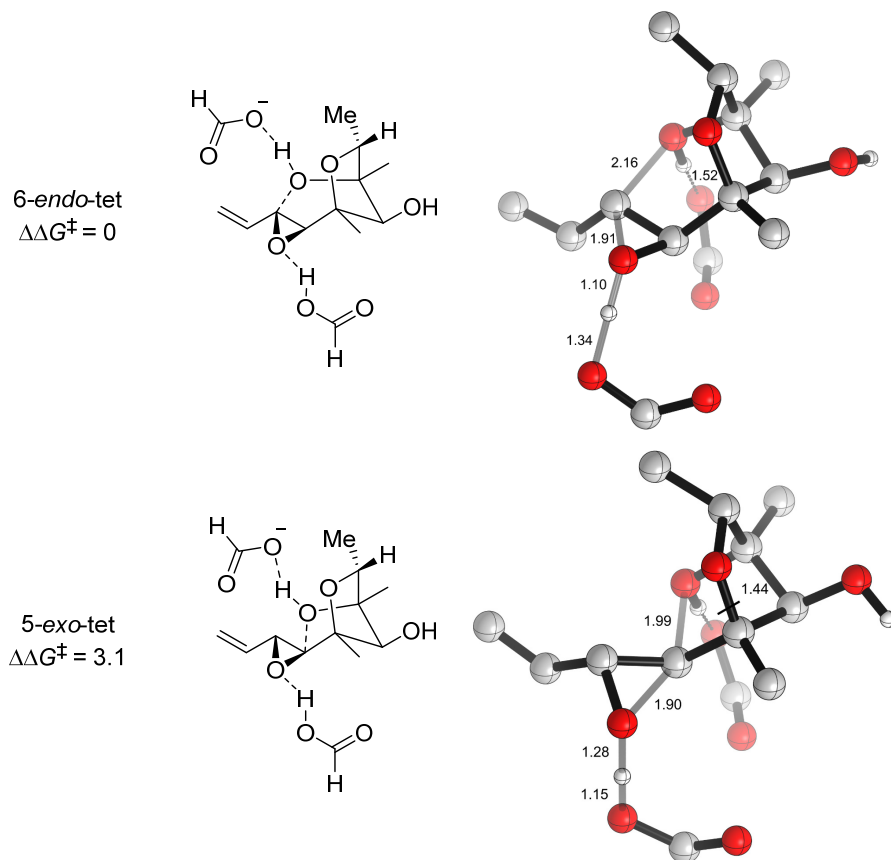

**Figure S13.** Simultaneous general acid/base catalysis in epoxide-opening cyclization reactions (formic acid and formate ion as acid and base respectively). M06-2X/6-311++G(d,p)-IEFPCM(water)//M06-2X/6-31G(d)-IEFPCM(water). Non-critical hydrogen atoms omitted for clarity. All energies in kcal mol<sup>-1</sup>.

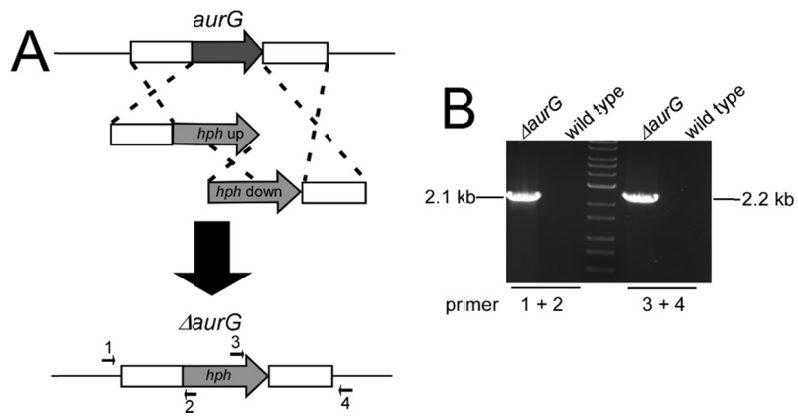

**Figure S14.** Deletion of *aurG* in *C. arbuscula*. The genotype was confirmed by PCR with primers as indicated.

A

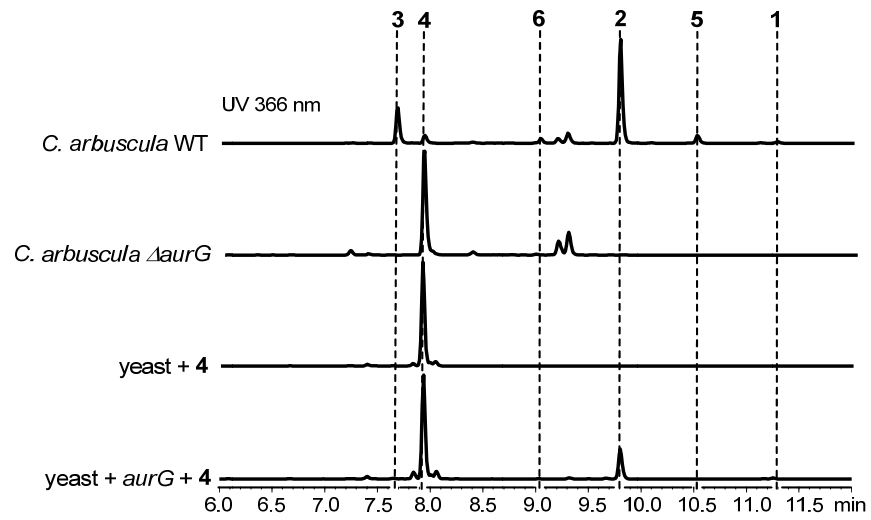

B

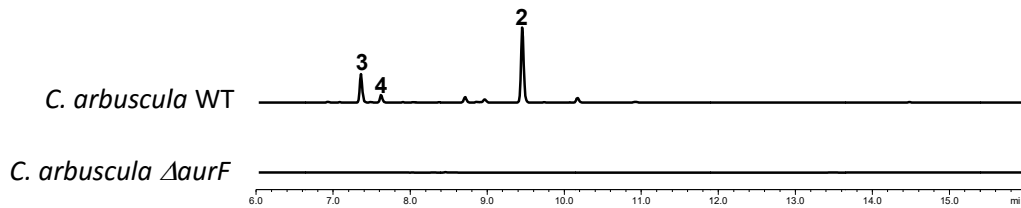

C.

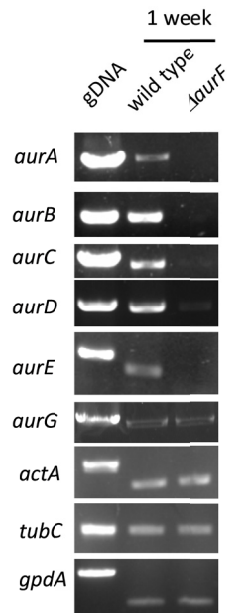

**Figure S15.** Functional verifications of AurG and AurF. (A) AurG is an *O*-acyltransferase involving in transformation of **4** to **2**. (B) AurF is the likely transcriptional factor that regulates the expression of the entire cluster. Knockout of *aurF* eliminates production of aurovertin production. (C) Transcription analysis of *aur* genes and housekeeping genes in wild type and  $\Delta aurF$  mutant.

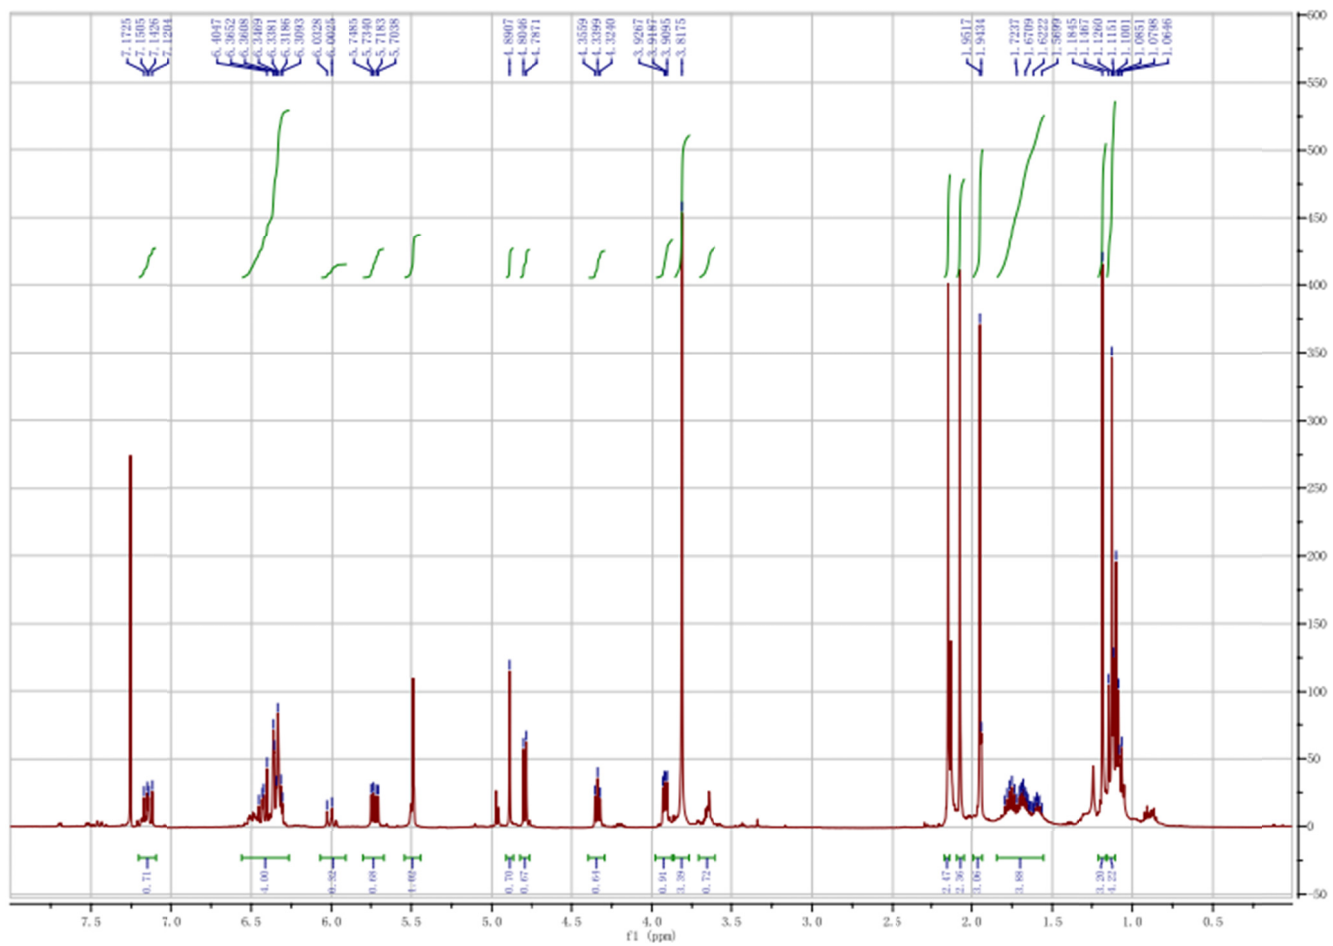

Figure S16.  $^1\text{H}$  NMR of aurovertin A (**1**) in  $\text{CDCl}_3$  (500 MHz)

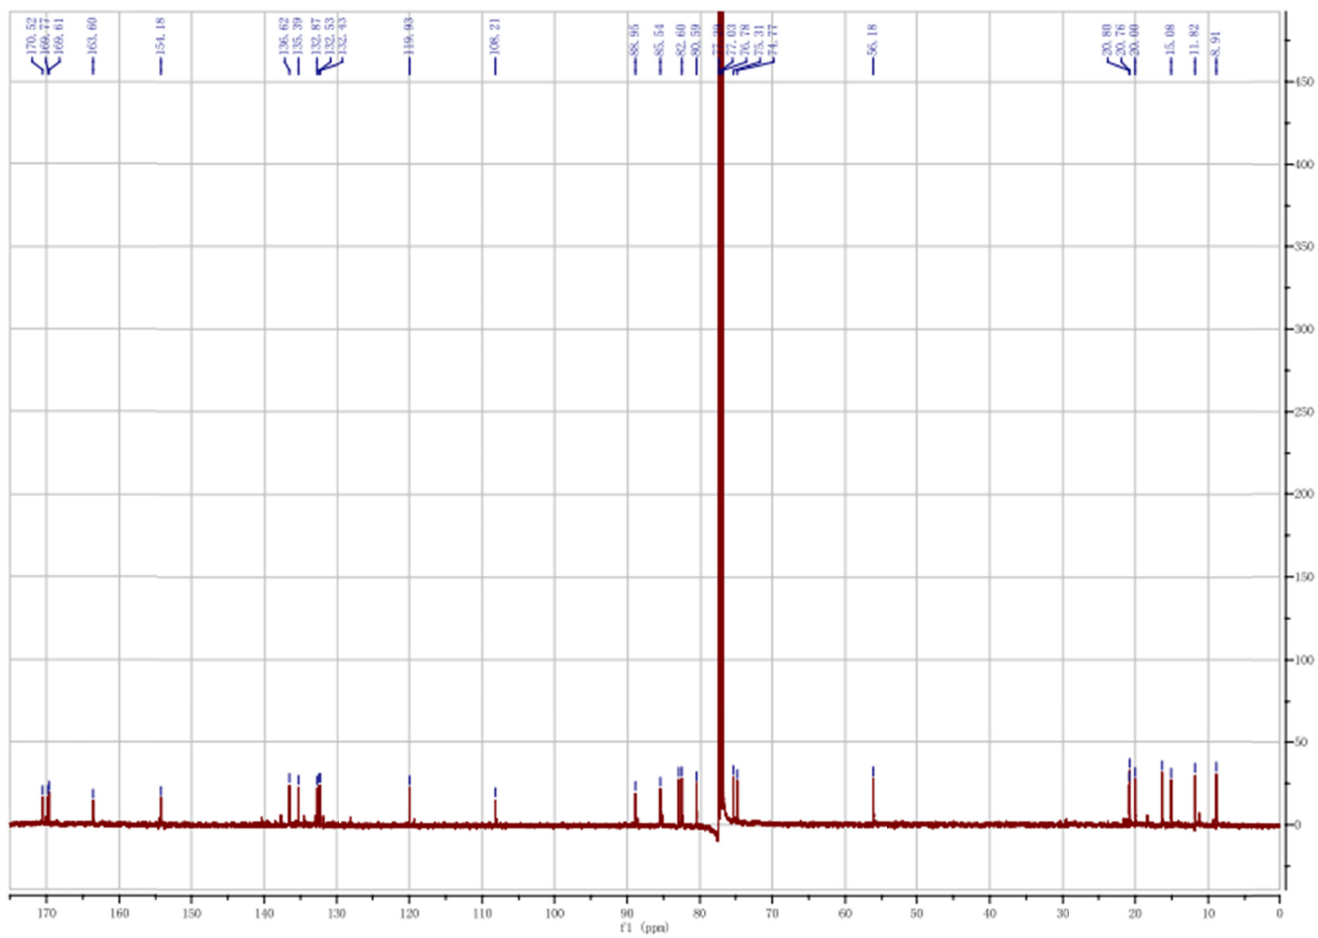

Figure S17. <sup>13</sup>C NMR of aurovertin A (1) in CDCl<sub>3</sub> (125 MHz)



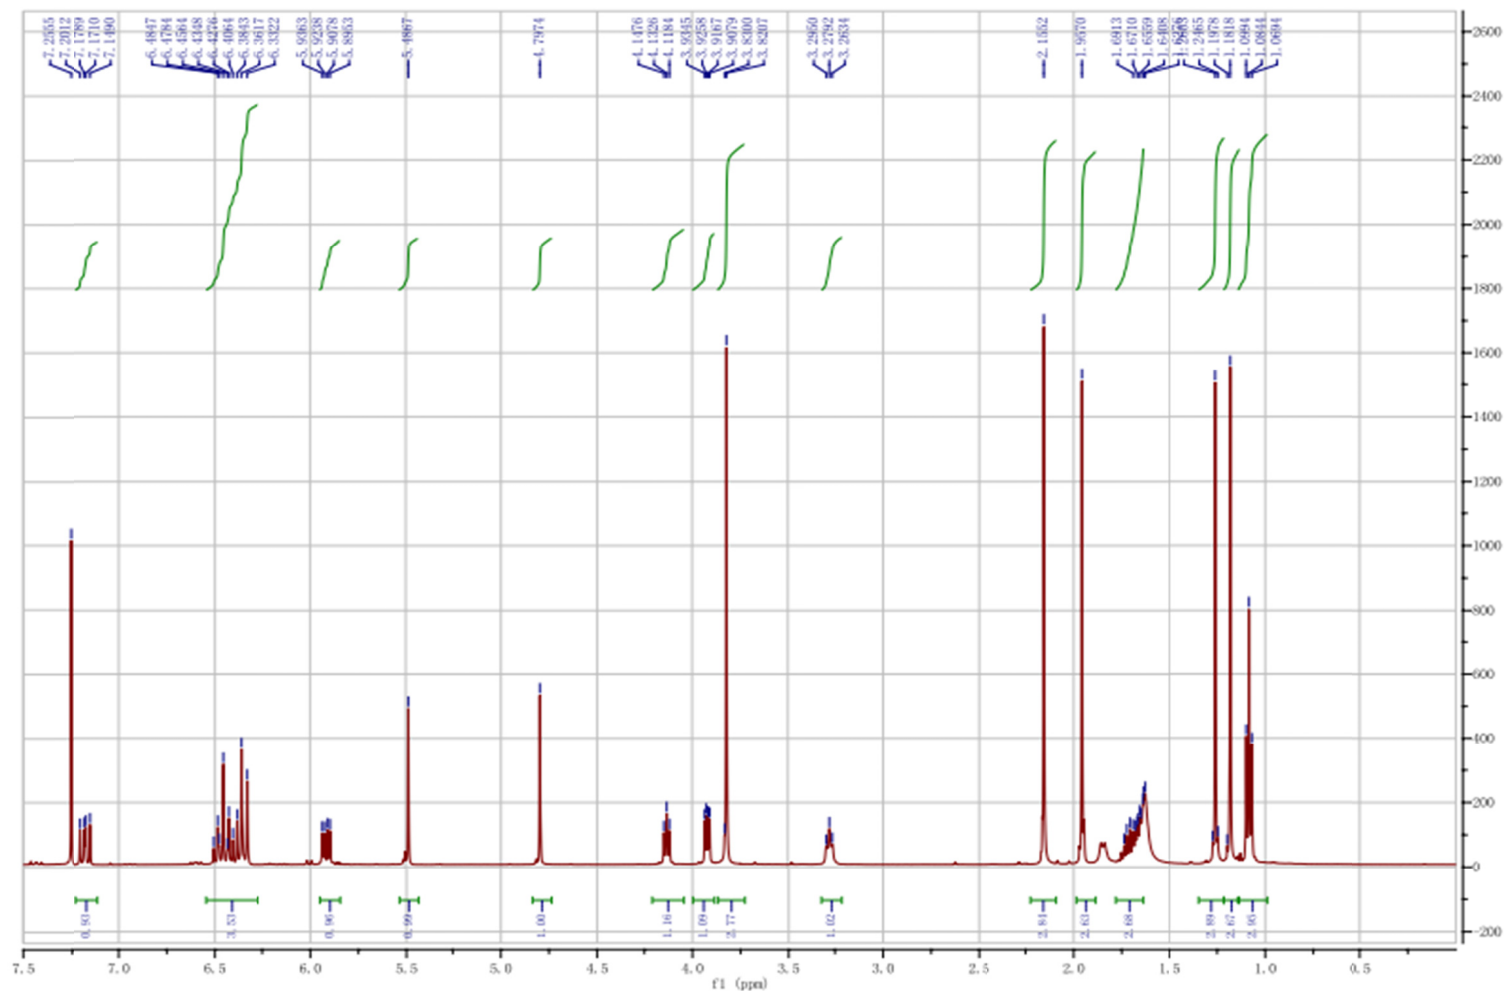

Figure S18.  $^1\text{H}$  NMR of aurovertin B (**2**) in  $\text{CDCl}_3$  (500 MHz)

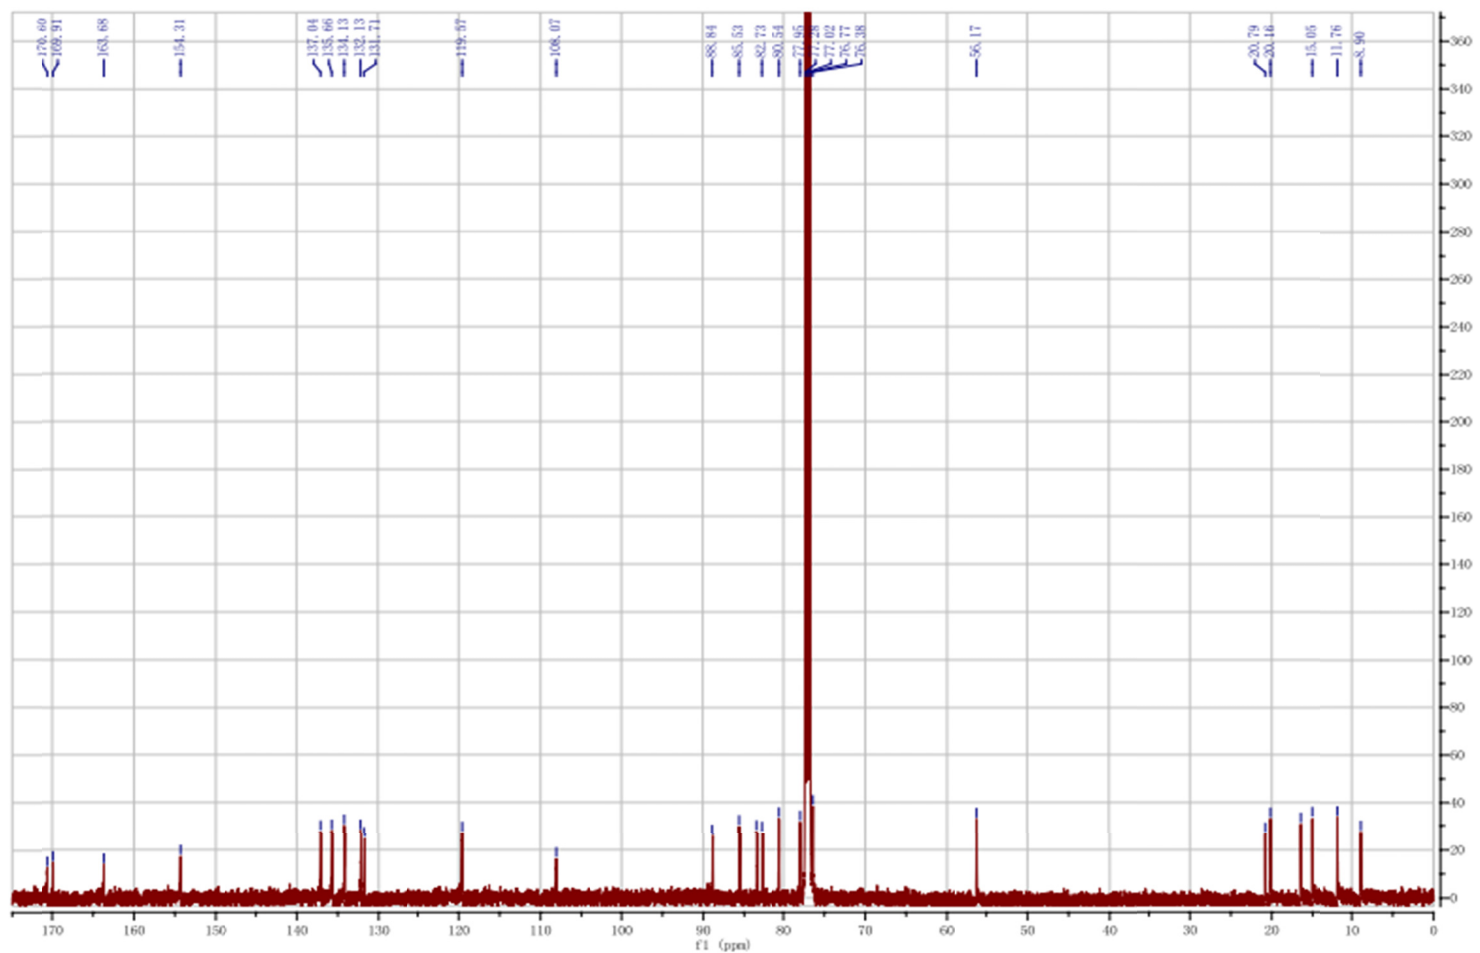

Figure S19.  $^{13}\text{C}$  NMR of aurovertin B (2) in  $\text{CDCl}_3$  (125 MHz)

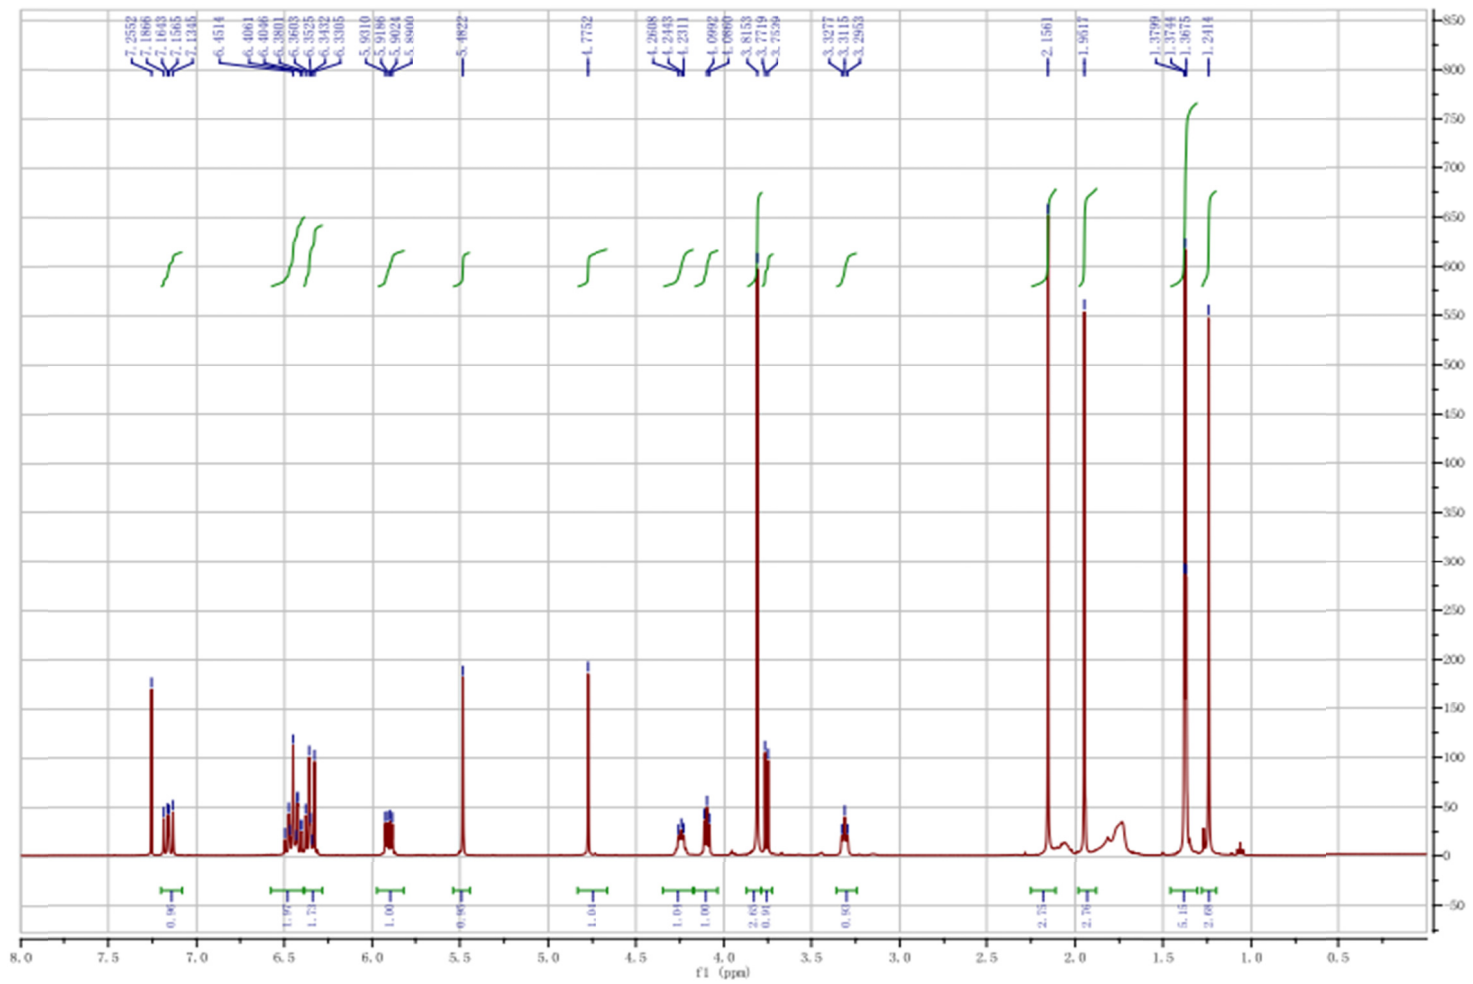

Figure S20. <sup>1</sup>H NMR of aurovertin D (3) in CDCl<sub>3</sub> (500 MHz)

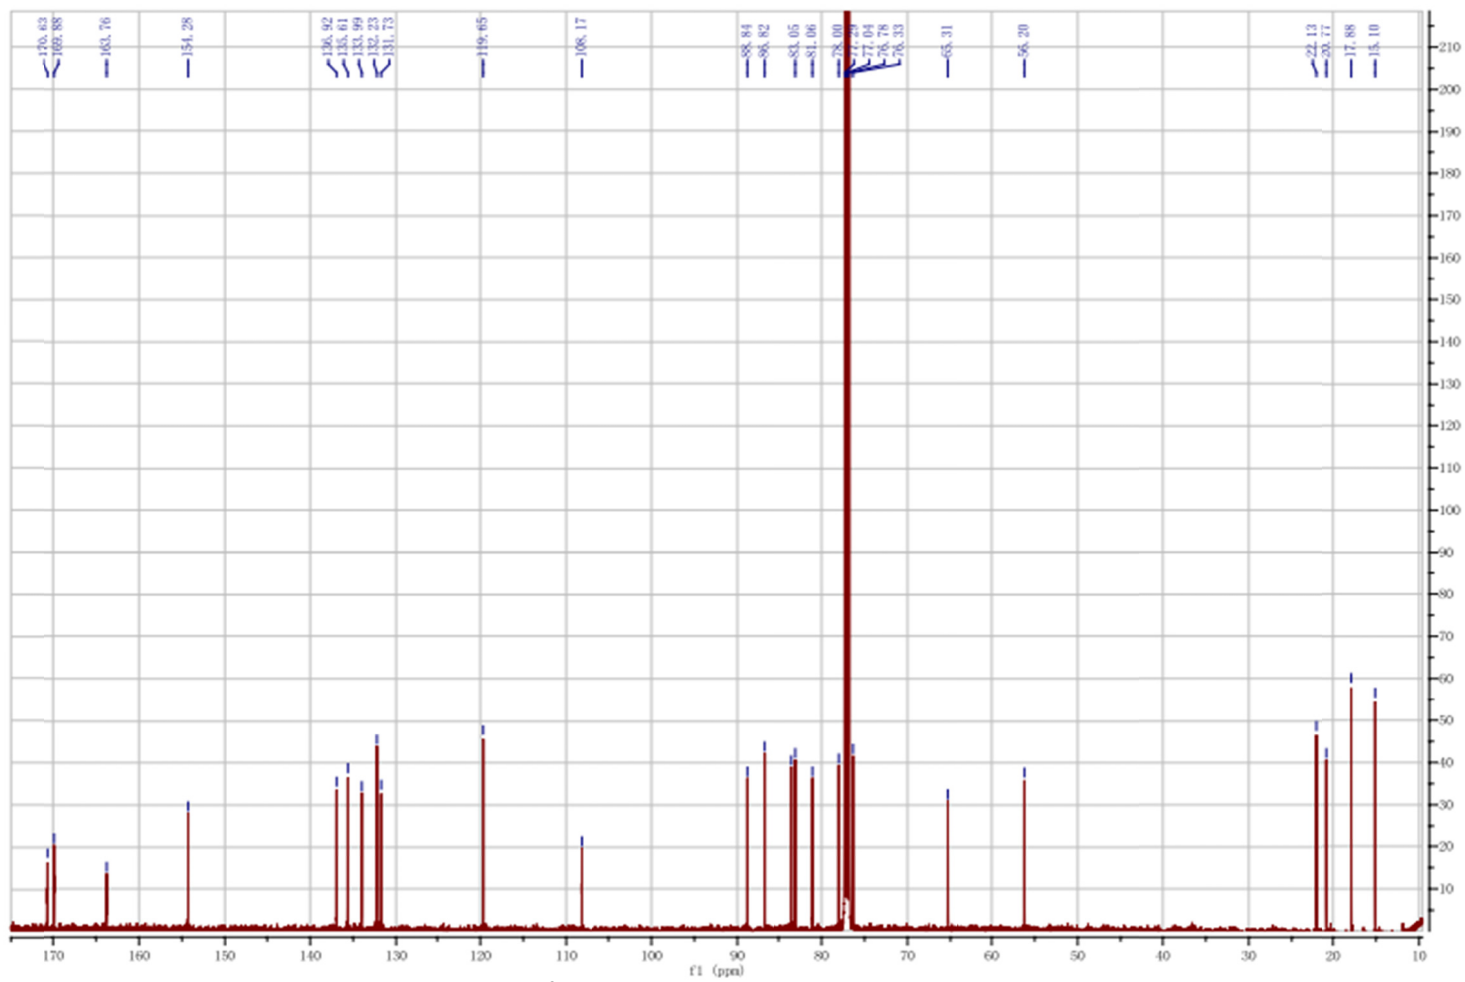

Figure S21.  $^{13}\text{C}$  NMR of aurovertin D (**3**) in  $\text{CDCl}_3$  (125 MHz)

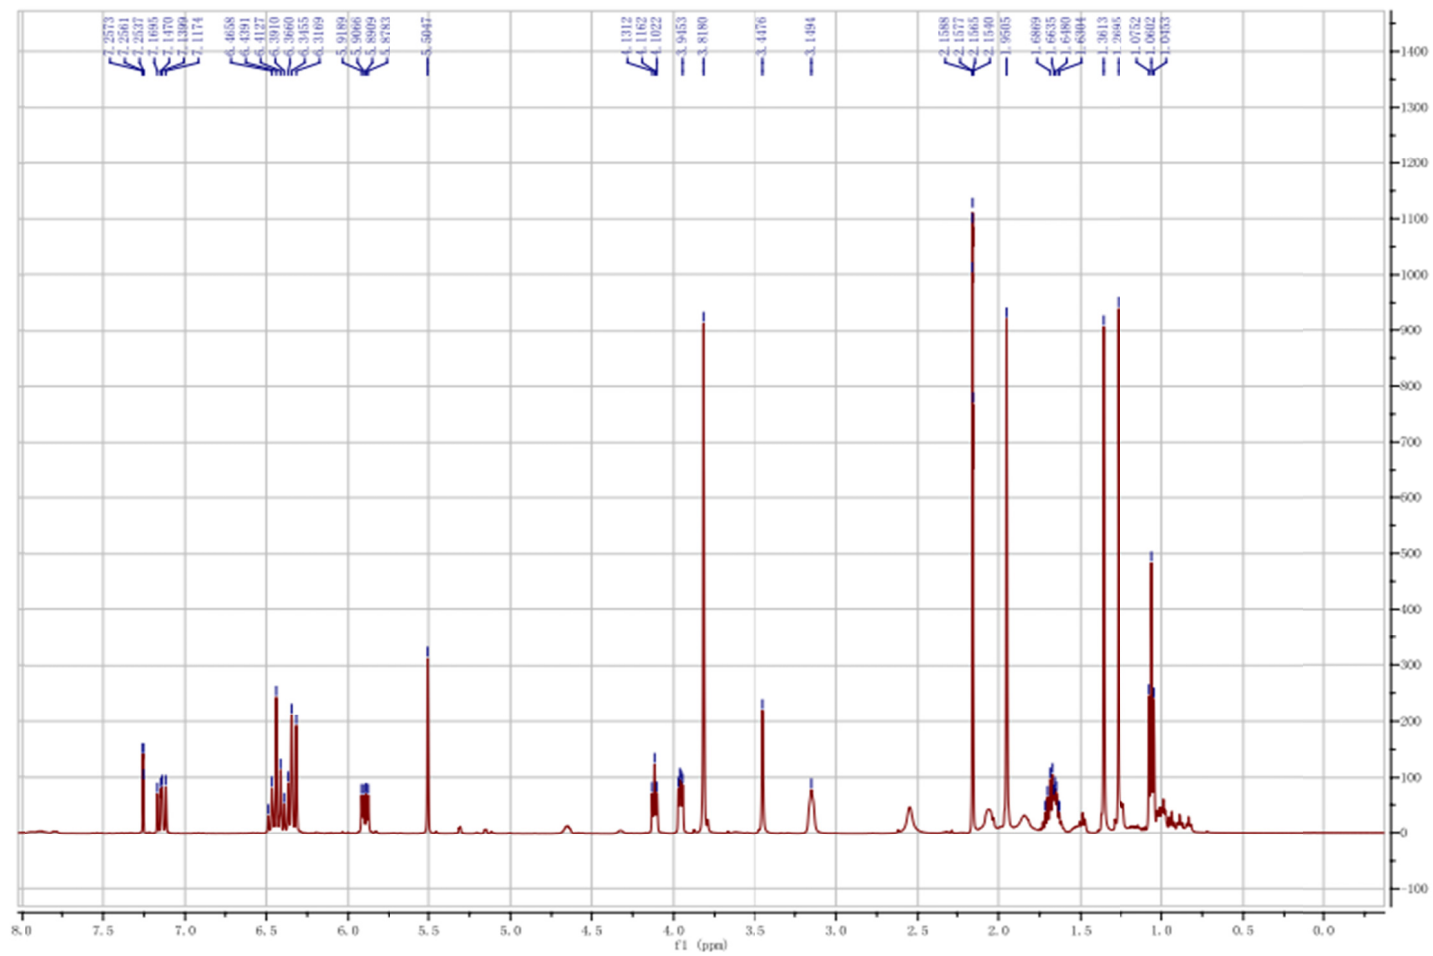

Figure S22. <sup>1</sup>H NMR of aurovertin E (4) in CDCl<sub>3</sub> (500 MHz)

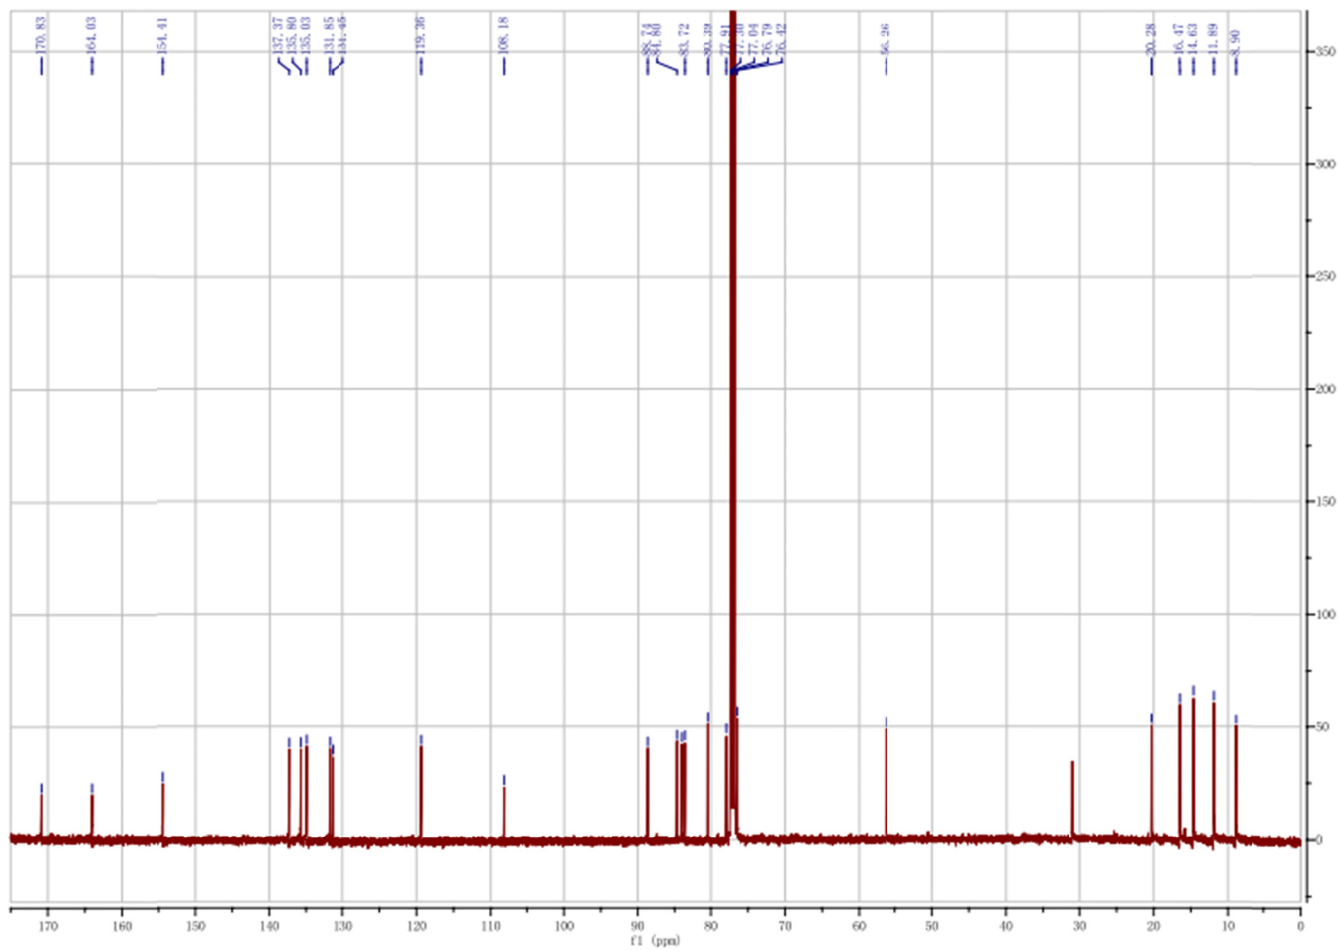

Figure S23. <sup>1</sup>H NMR of aurovertin E (4) in CDCl<sub>3</sub> (125 MHz)

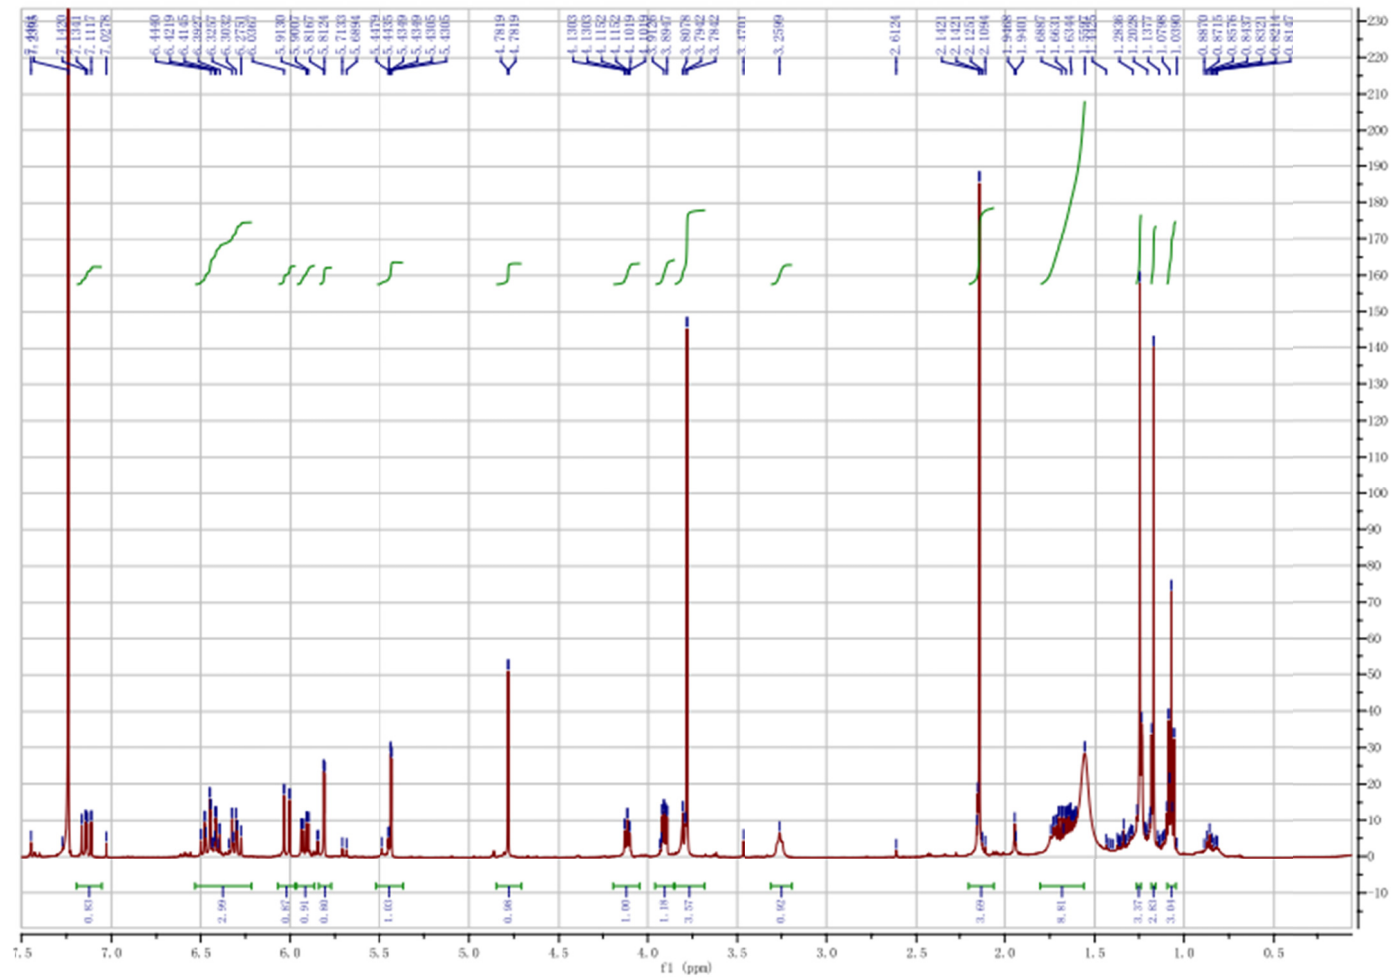

Figure S24.  $^1\text{H}$  NMR of aurovertin J (**5**) in  $\text{CDCl}_3$  (500 MHz)

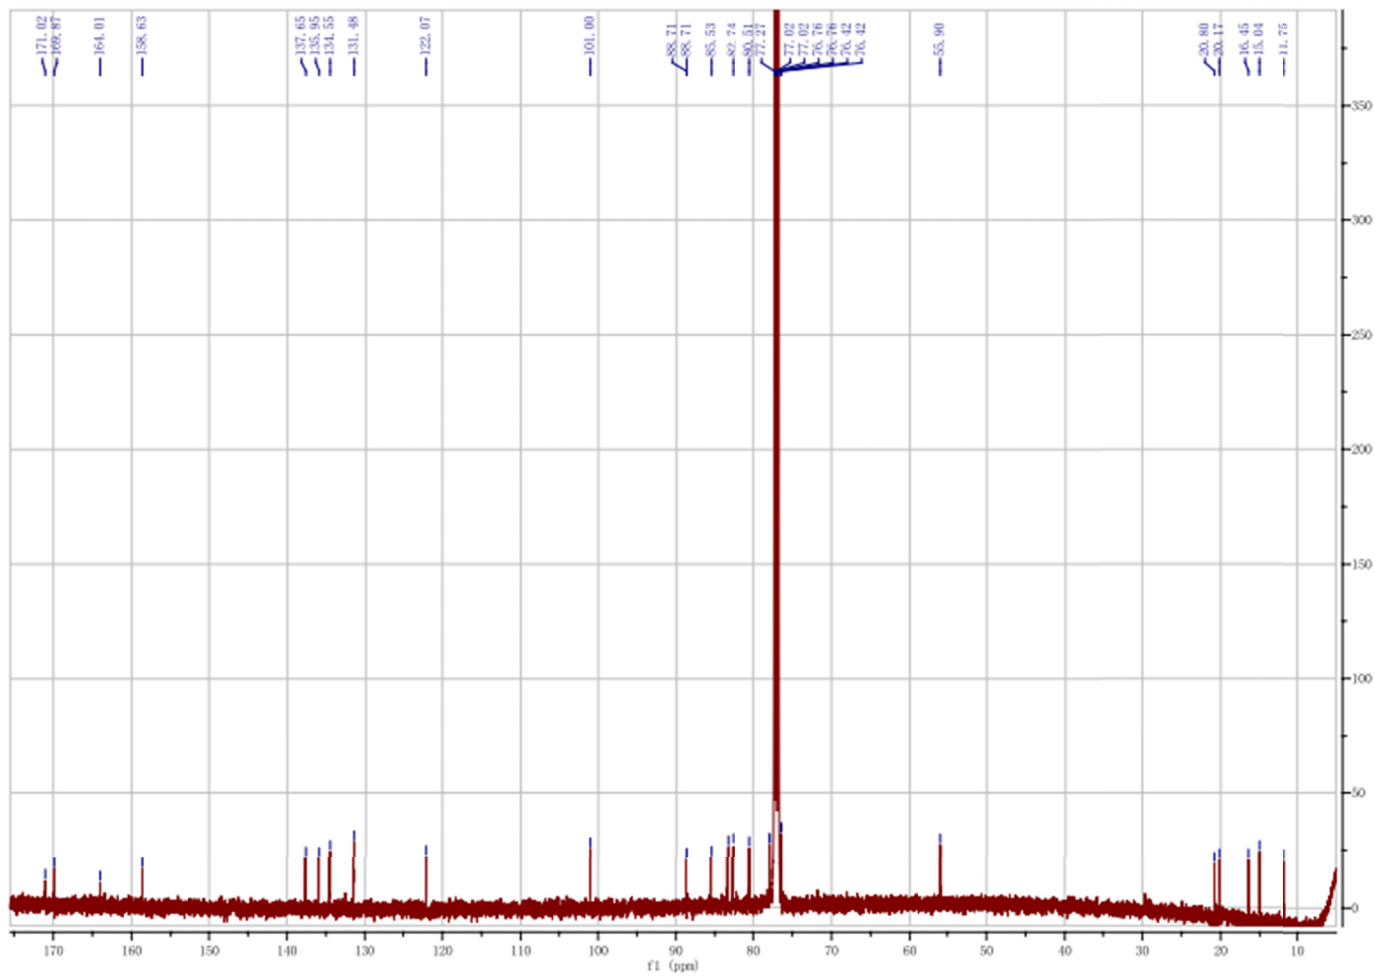

Figure S25. <sup>13</sup>C NMR of aurovertin J (5) in CDCl<sub>3</sub> (125 MHz)



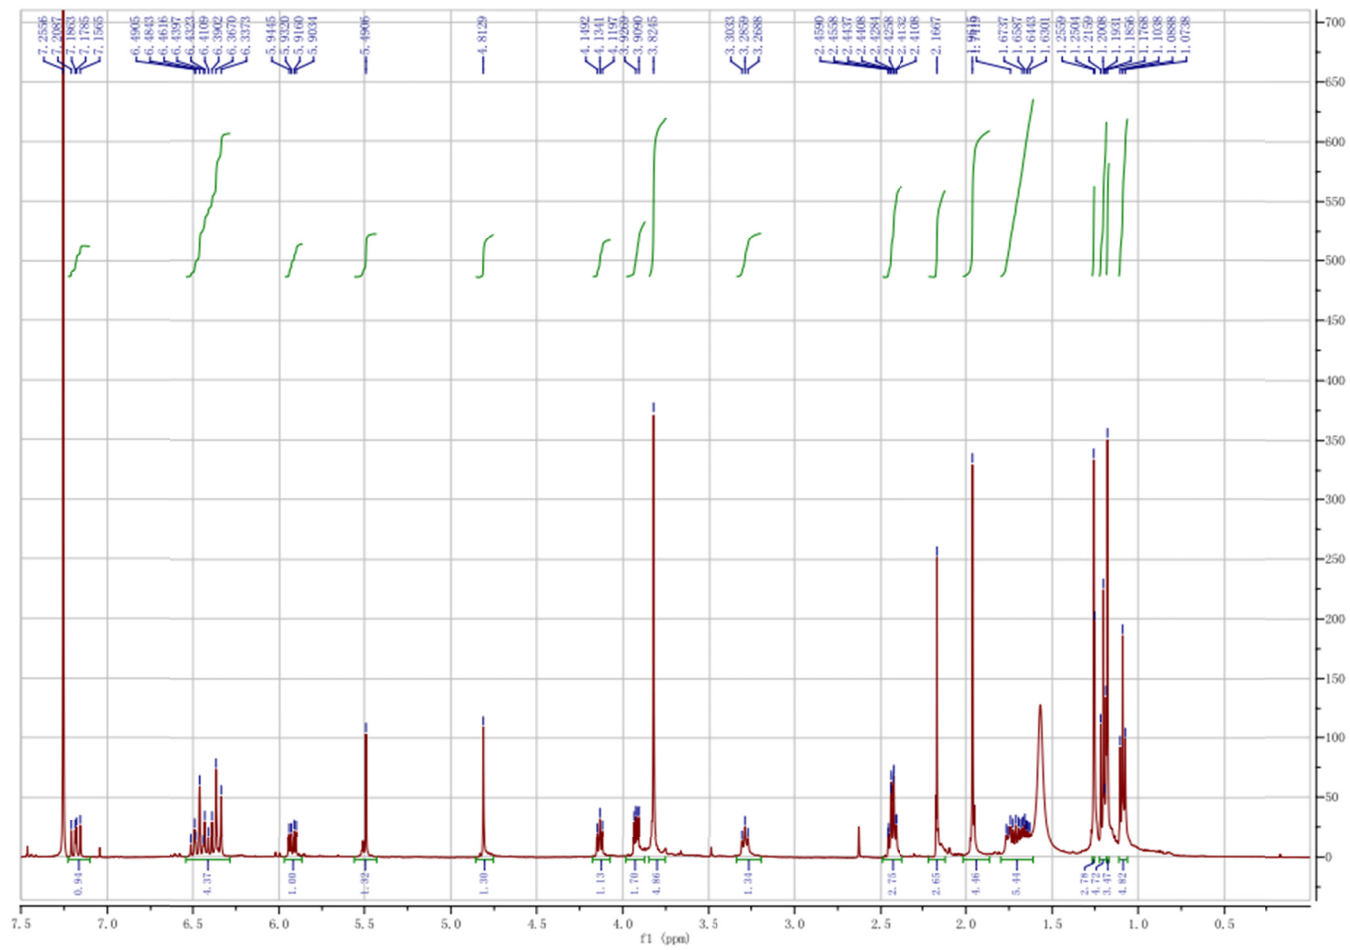

Figure S26.  $^1\text{H}$  NMR of aurovertin M (**6**) in  $\text{CDCl}_3$  (500 MHz)

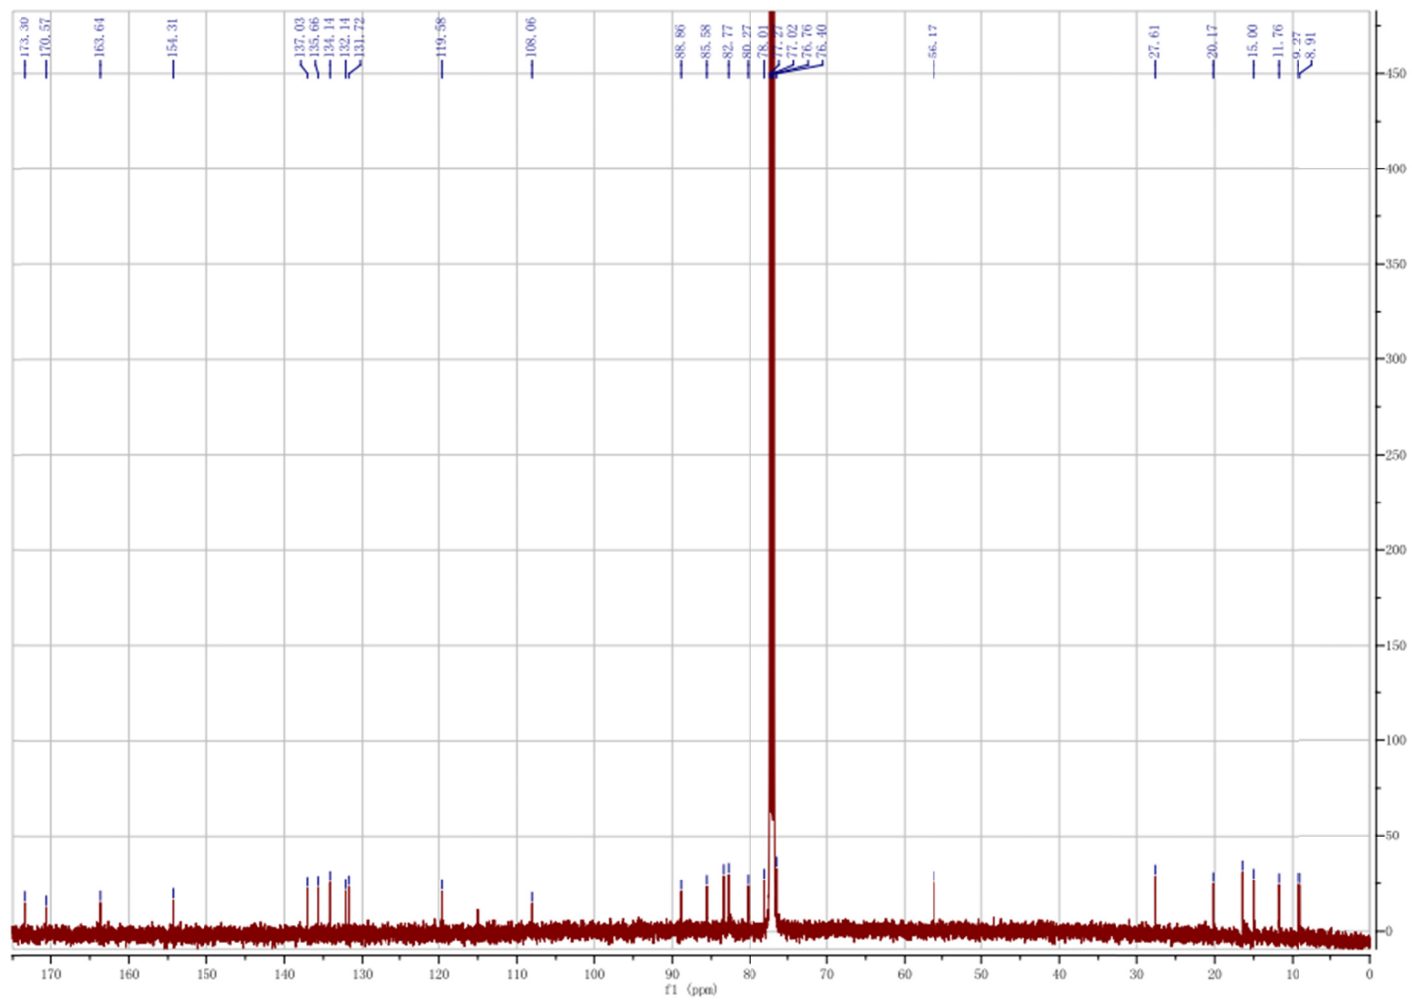

Figure S27.  $^{13}\text{C}$  NMR of aurovertin M(6) in  $\text{CDCl}_3$  (125 MHz)

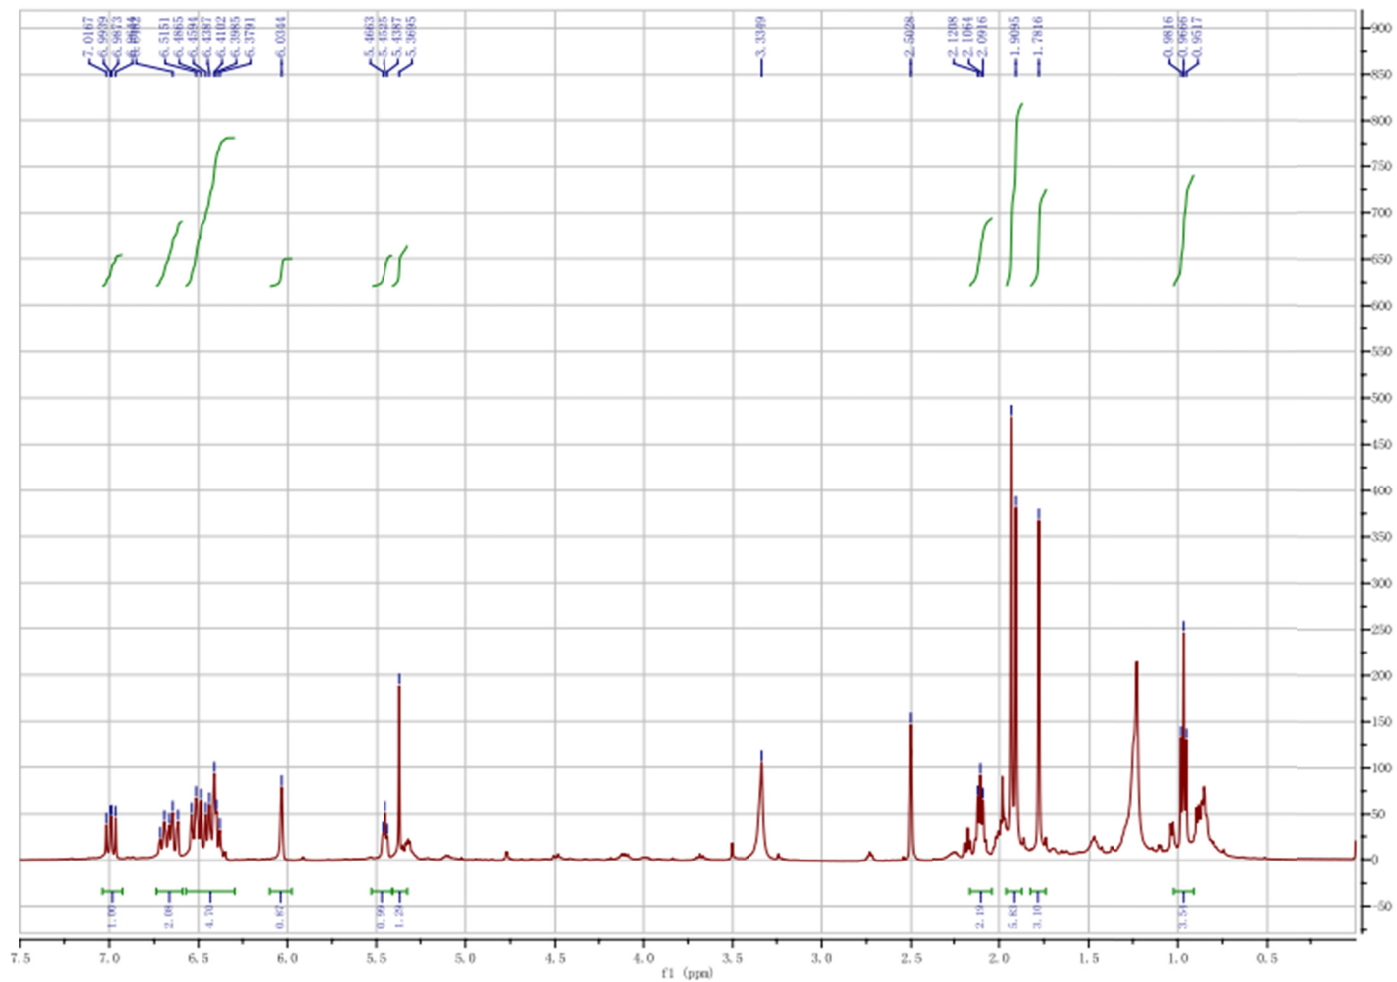

Figure S28.  $^1\text{H}$  NMR of compound **7** in DMSO- $d_6$  (500 MHz)

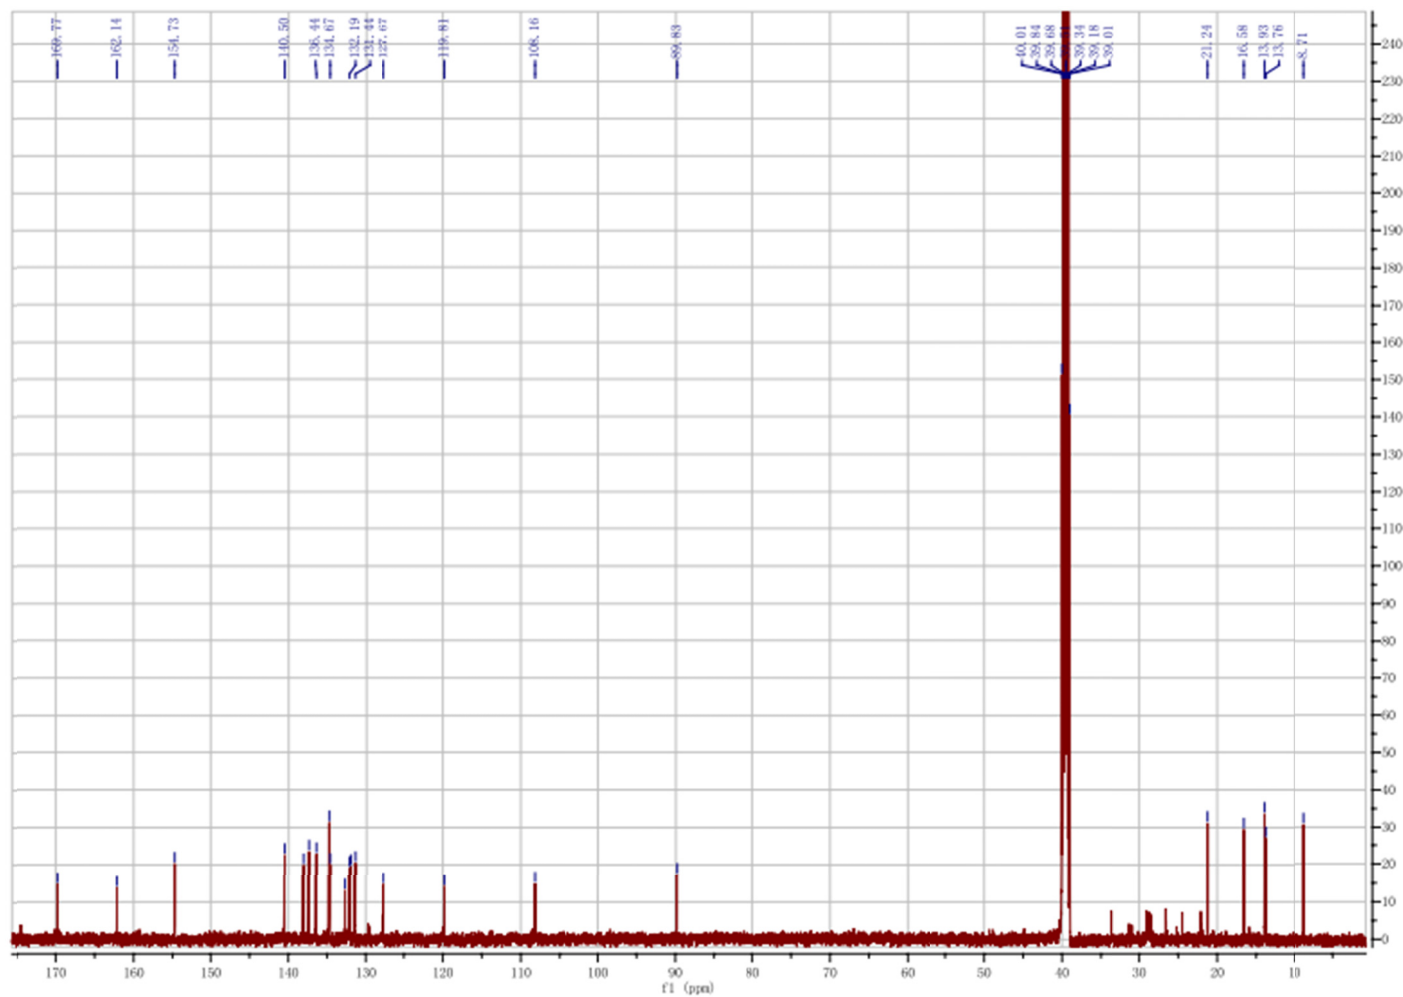

Figure S29.  $^{13}\text{C}$  NMR of compound 7 in DMSO- $d_6$  (125 MHz)

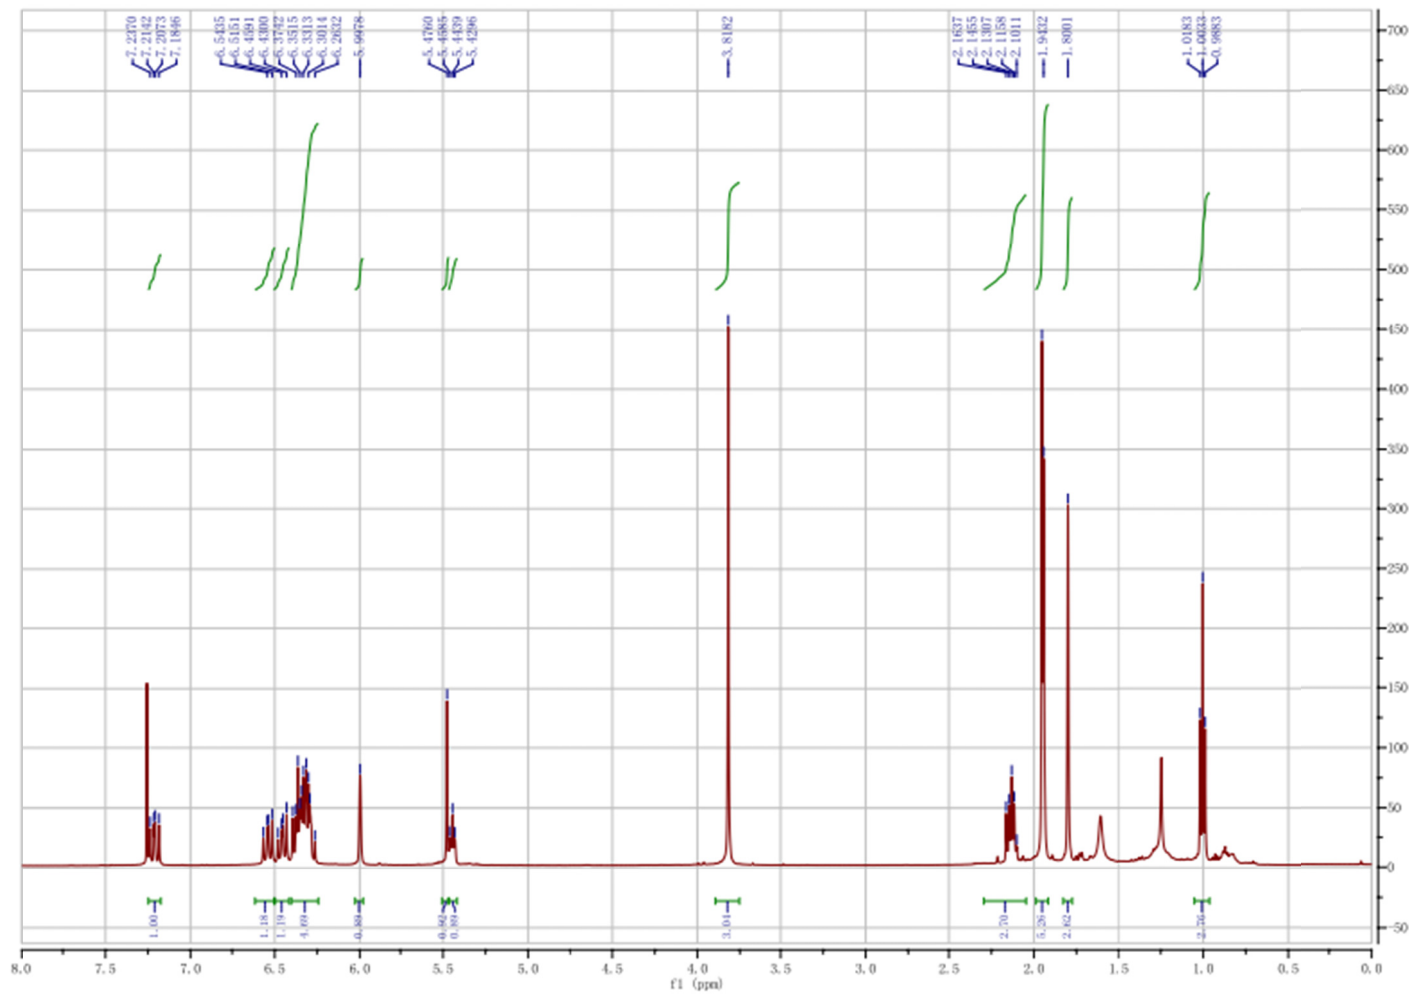

Figure S30.  $^1\text{H}$  NMR of compound **8** in  $\text{CDCl}_3$  (500 MHz)

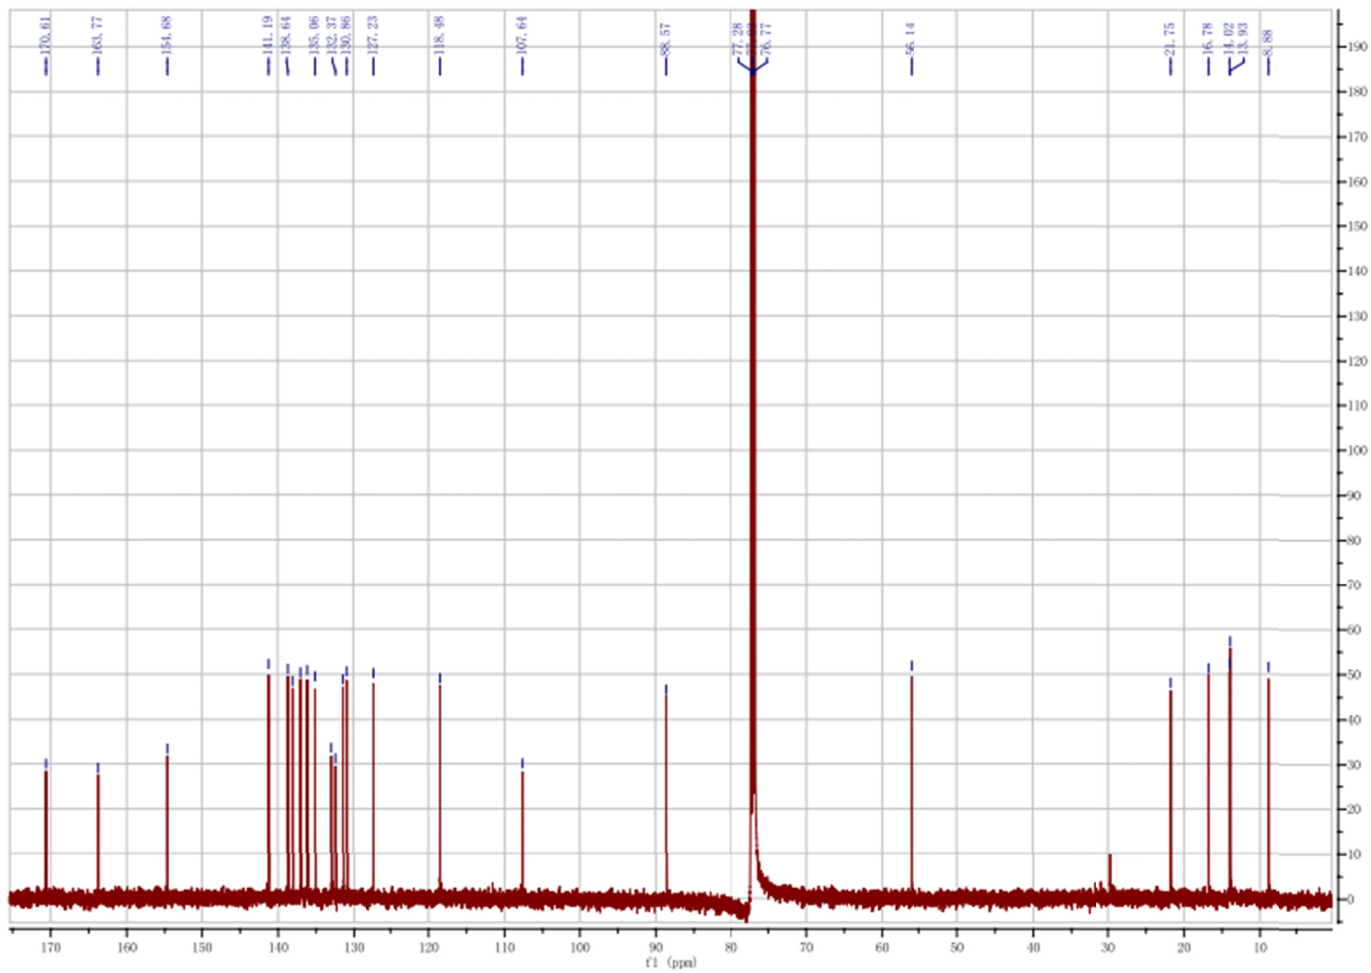

Figure S31.  $^{13}\text{C}$  NMR of compound **8** in  $\text{CDCl}_3$  (125 MHz)

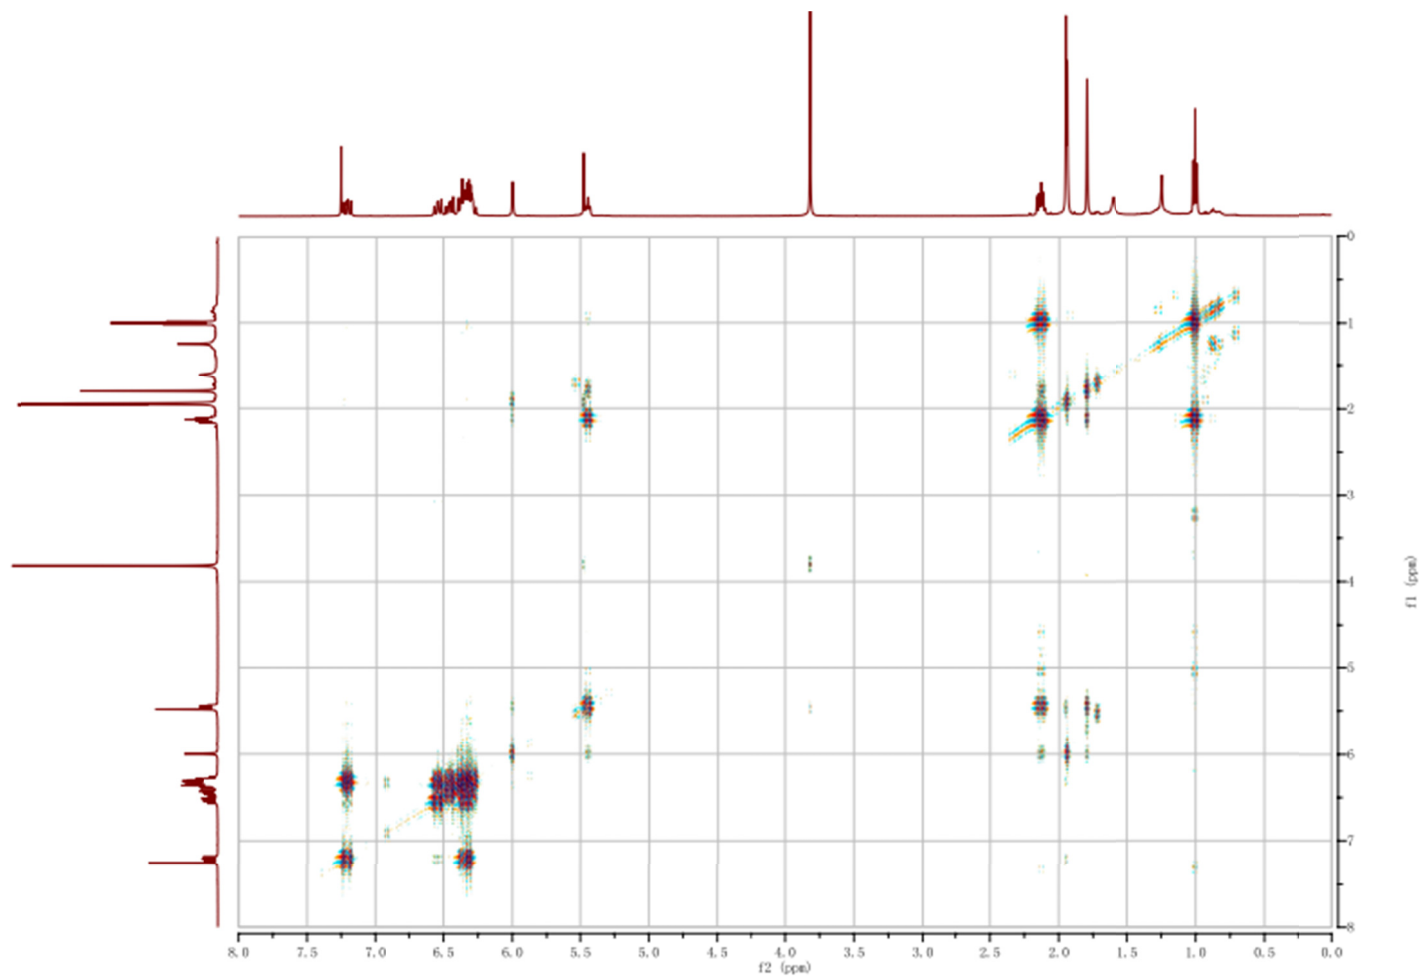

**Figure S32.**  $^1\text{H}$   $^1\text{H}$ -COSY of compound **8** in  $\text{CDCl}_3$  (500 MHz)

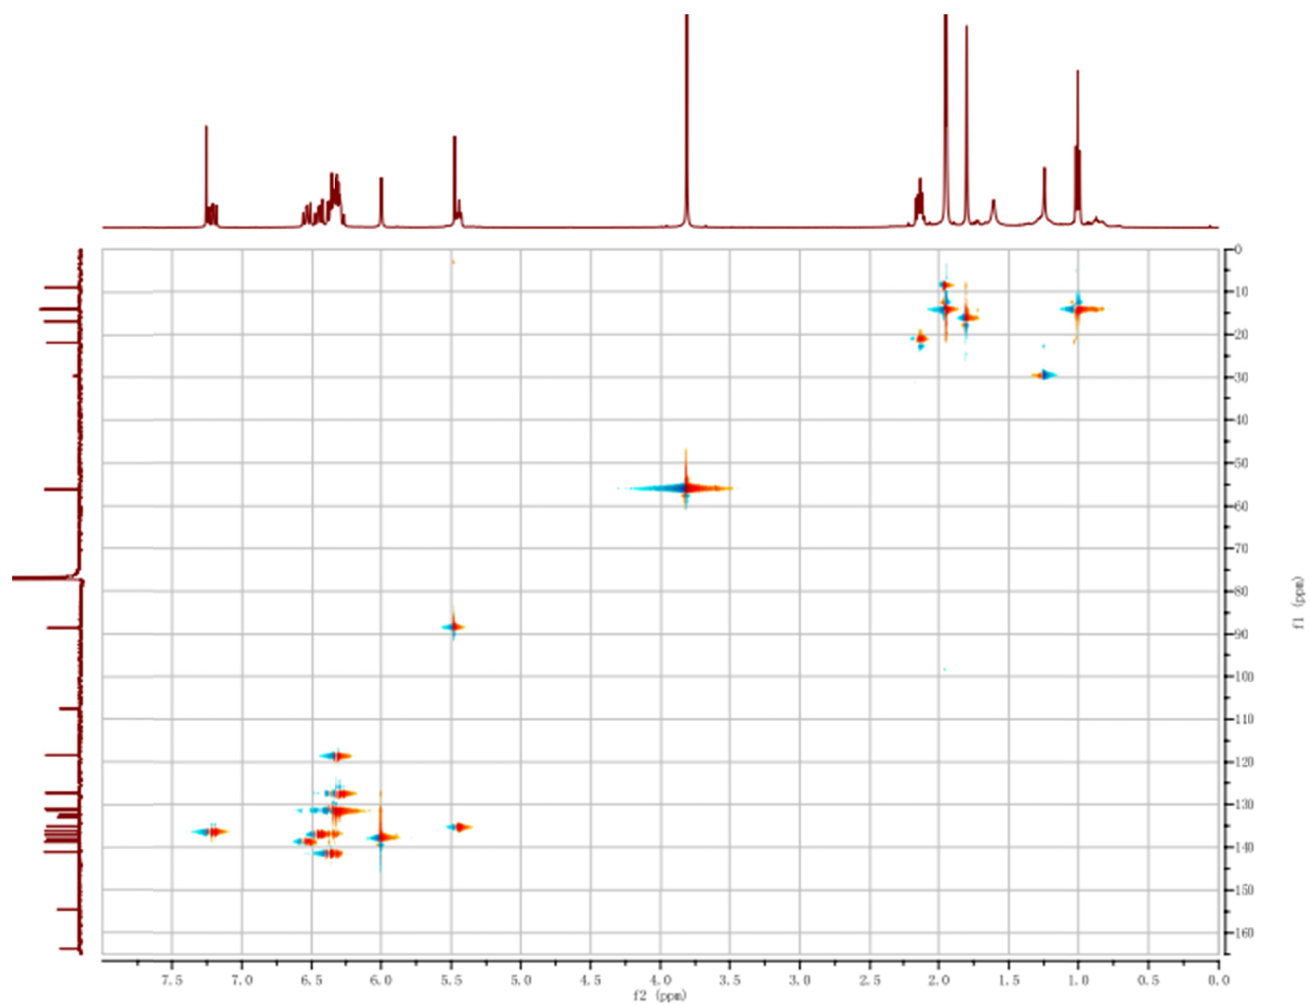

**Figure S33.** HSQC of compound **8** in CDCl<sub>3</sub> (500 MHz)



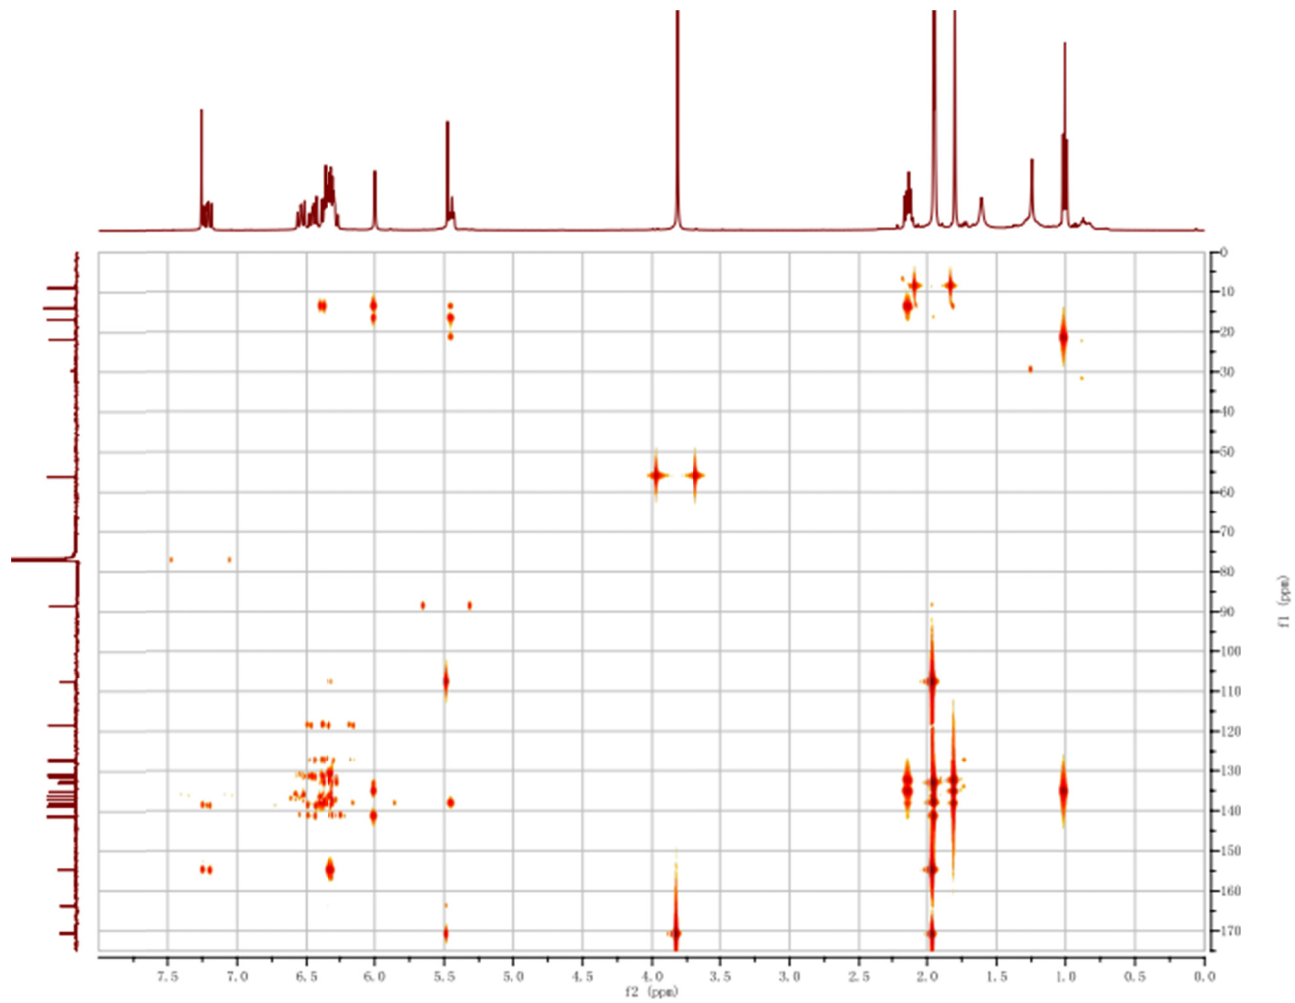

Figure S34. HMBC of compound **8** in CDCl<sub>3</sub> (500 MHz)

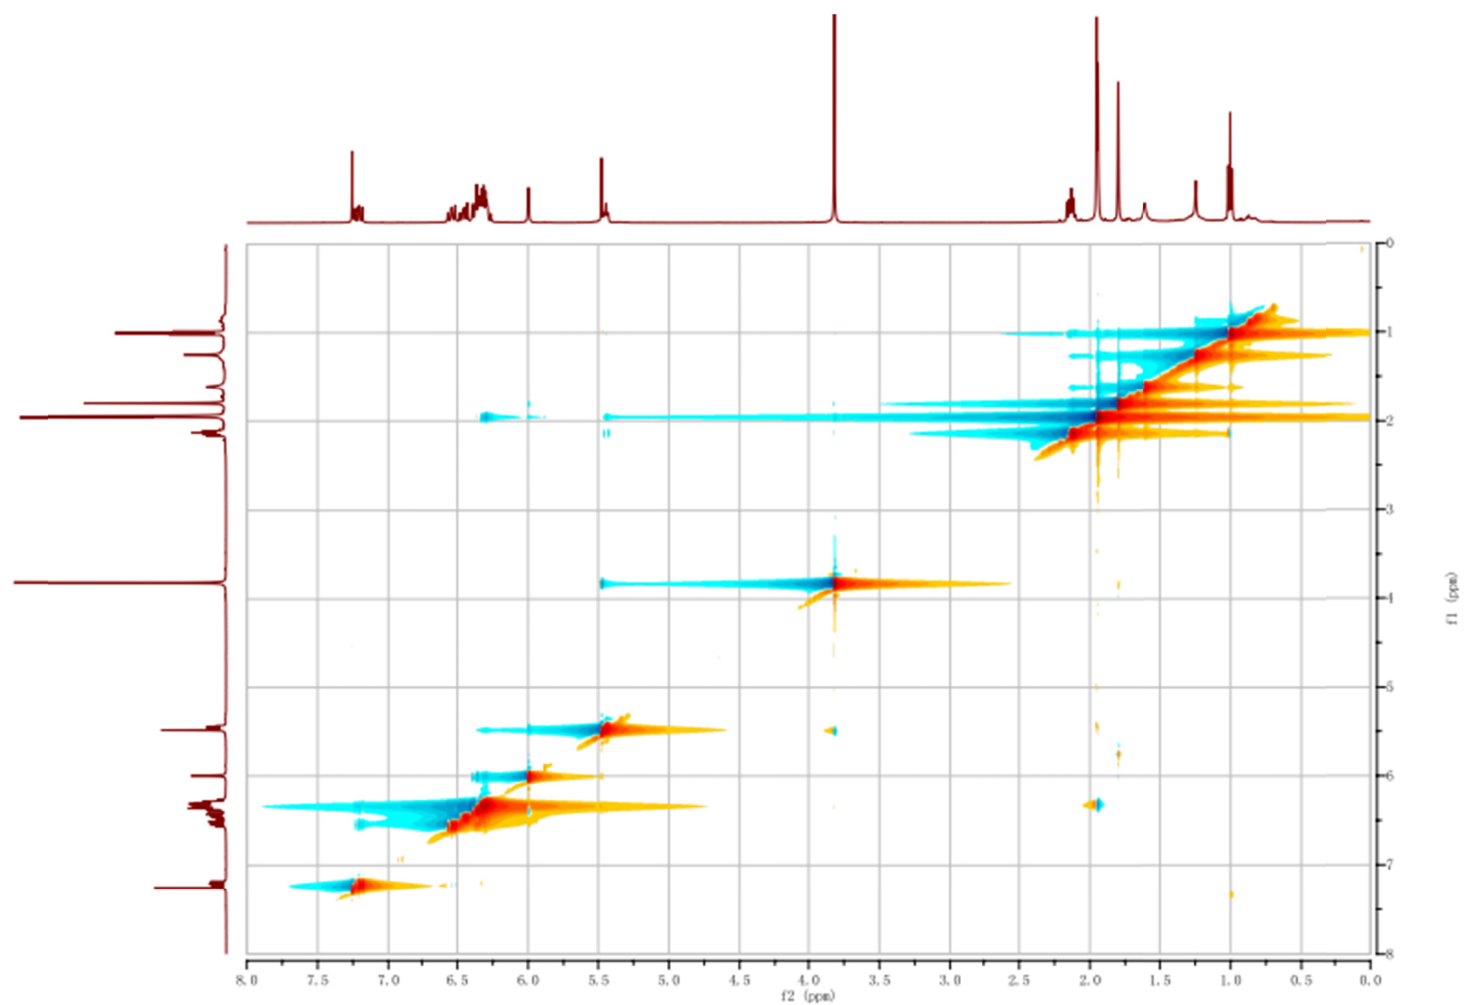

Figure S35. NOESY of compound **8** in CDCl<sub>3</sub> (500 MHz)

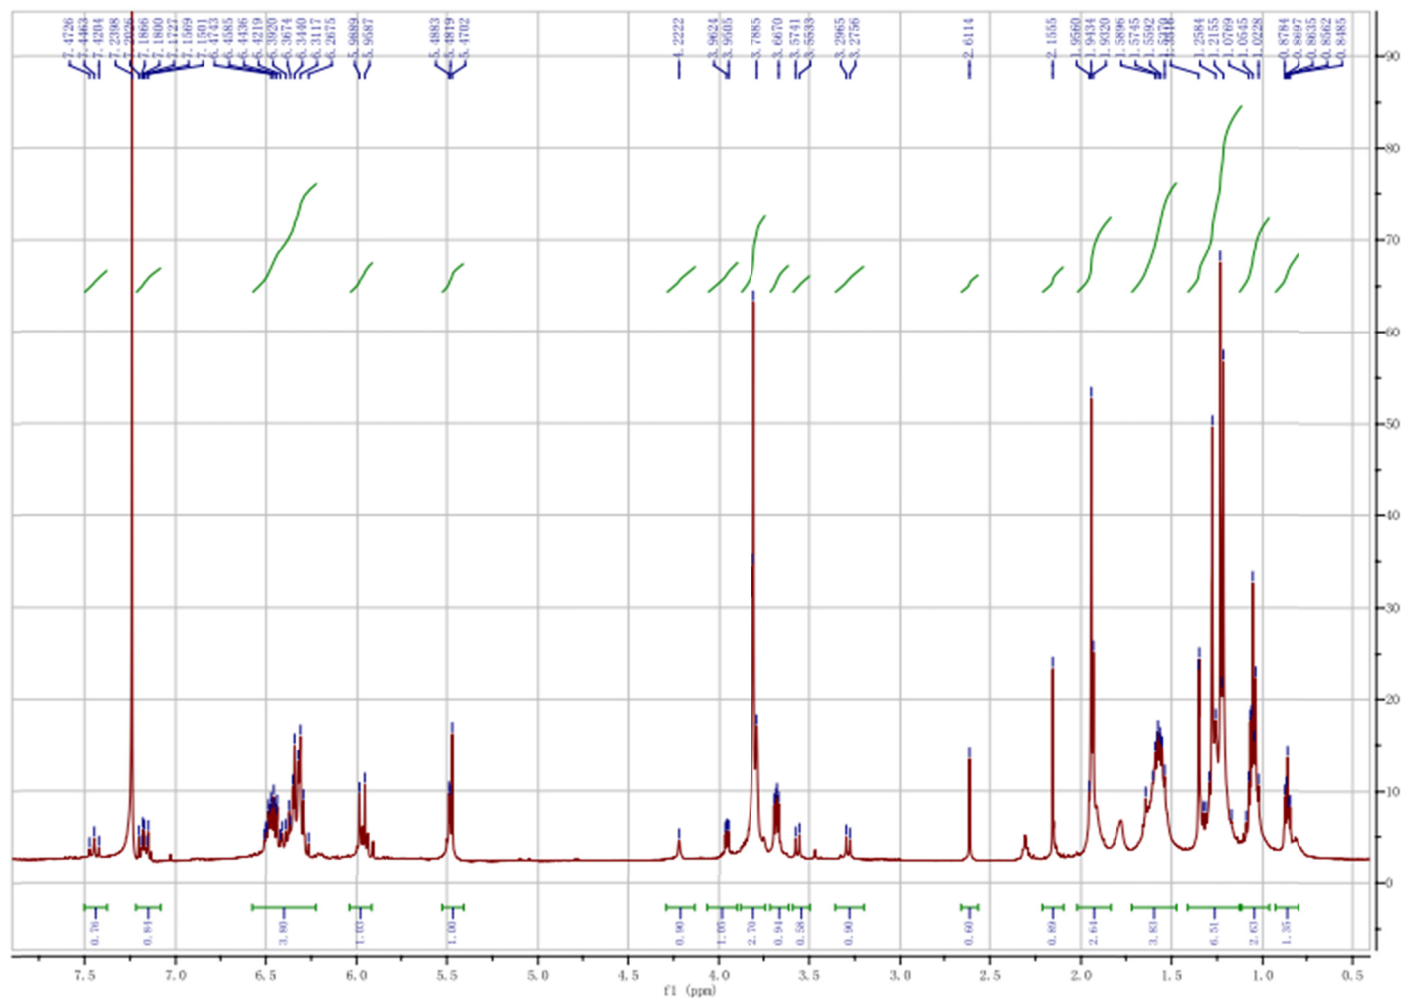

Figure S36.  $^1\text{H}$  NMR of compound **9** in  $\text{CDCl}_3$  (500 MHz)

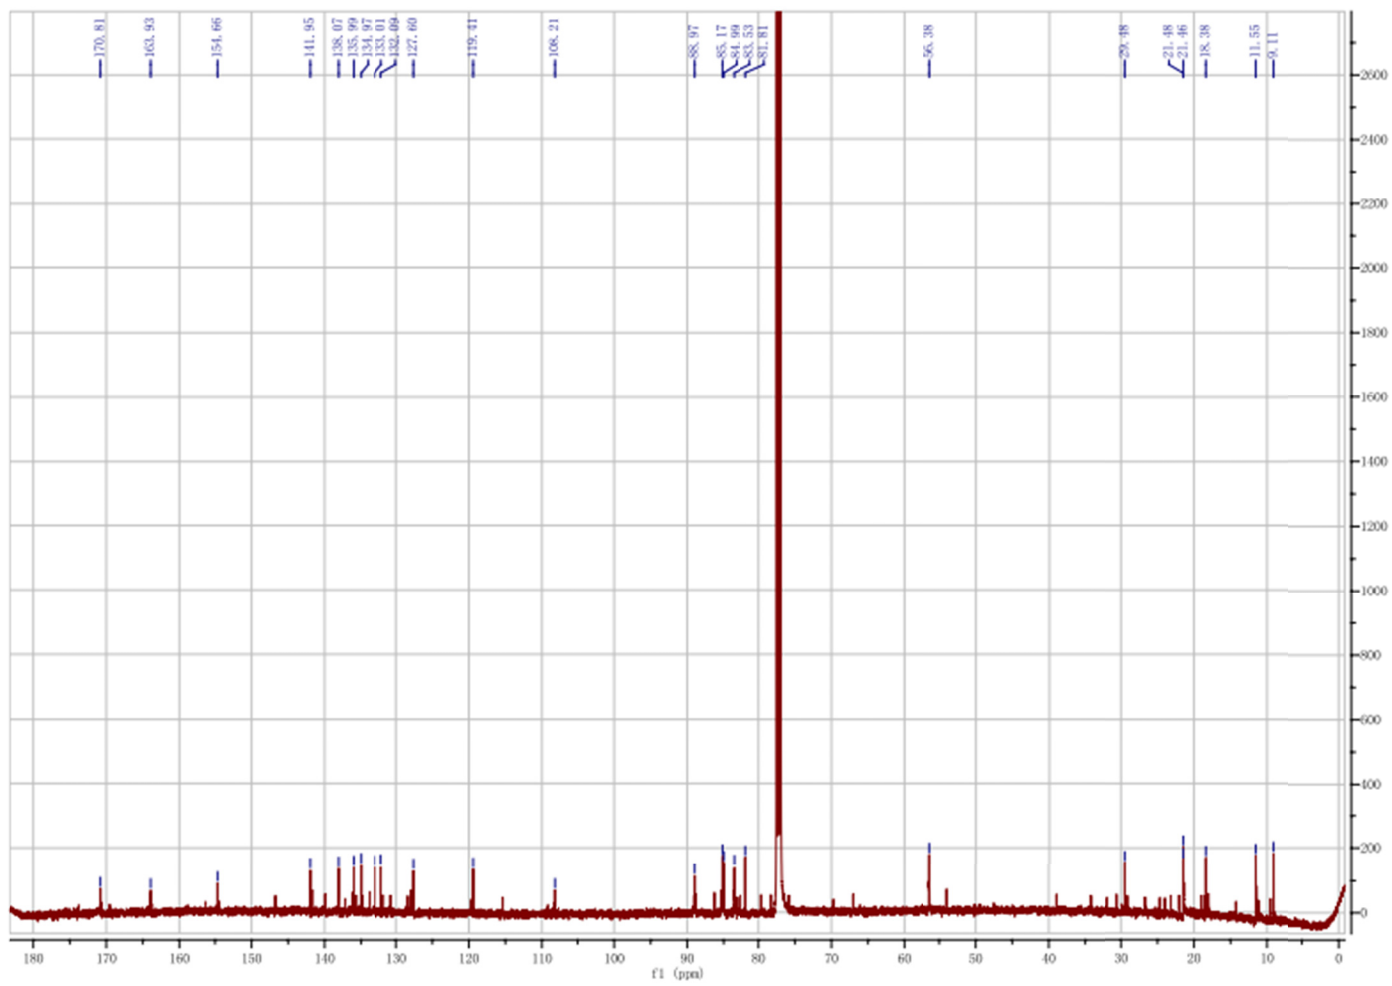

Figure S37.  $^{13}\text{C}$  NMR of compound 9 in  $\text{CDCl}_3$  (125 MHz)

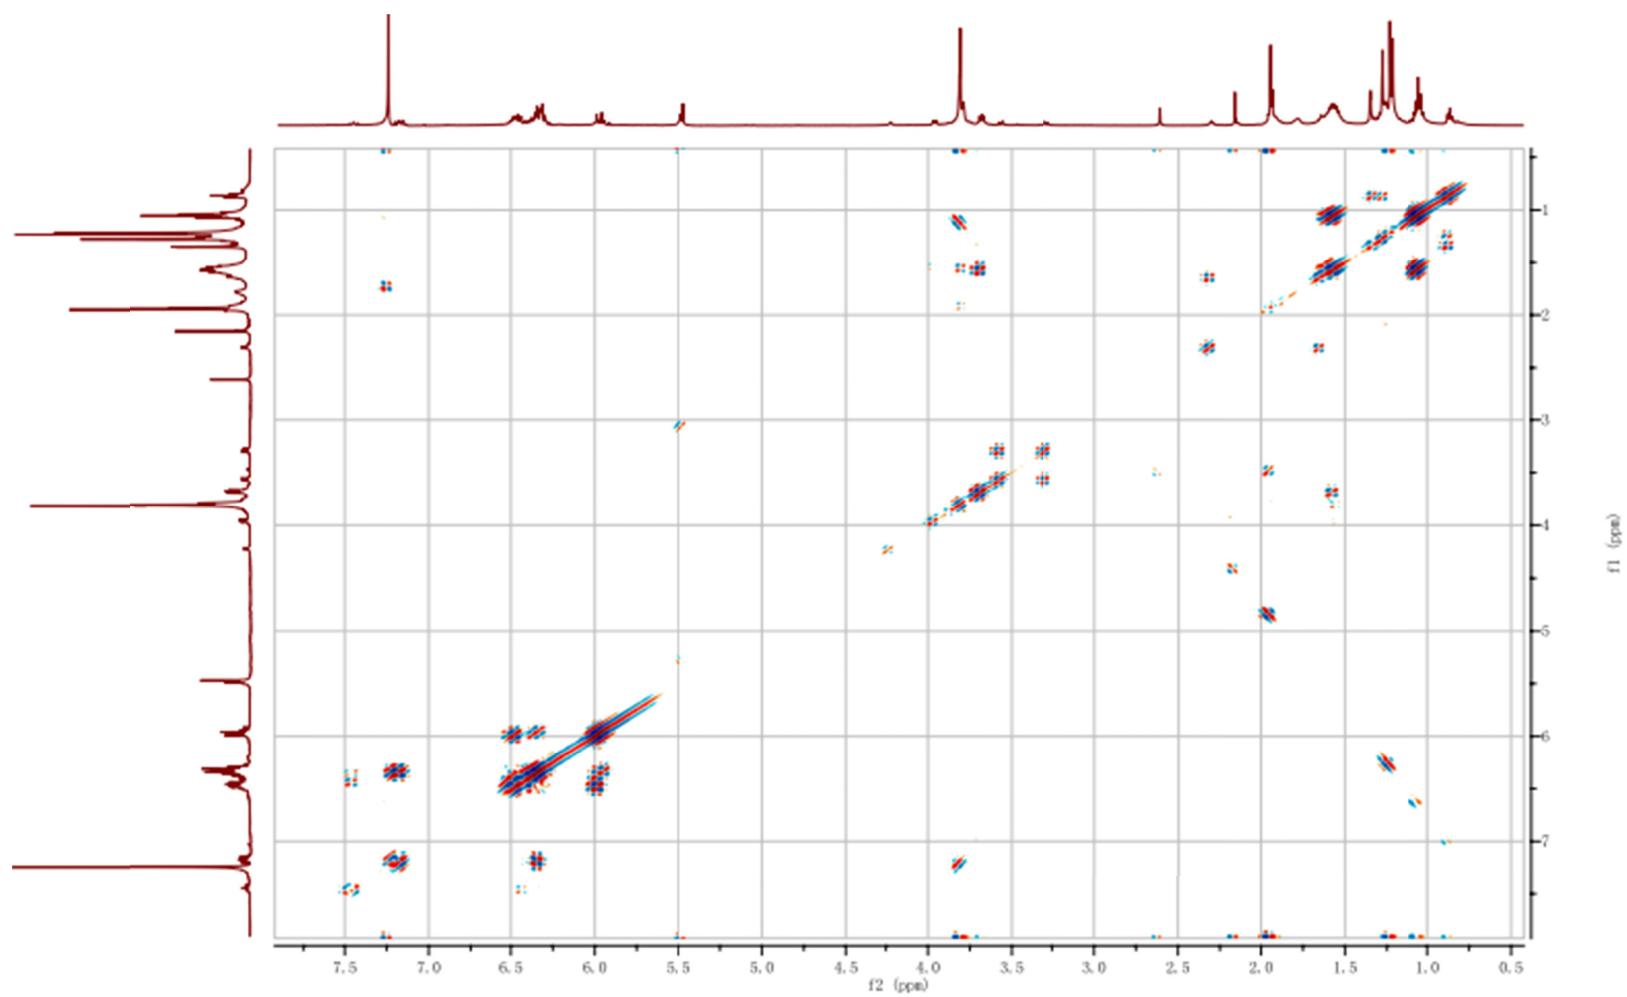

**Figure S38.**  $^1\text{H}$   $^1\text{H}$ -COSY of compound **9** in  $\text{CDCl}_3$  (500 MHz)

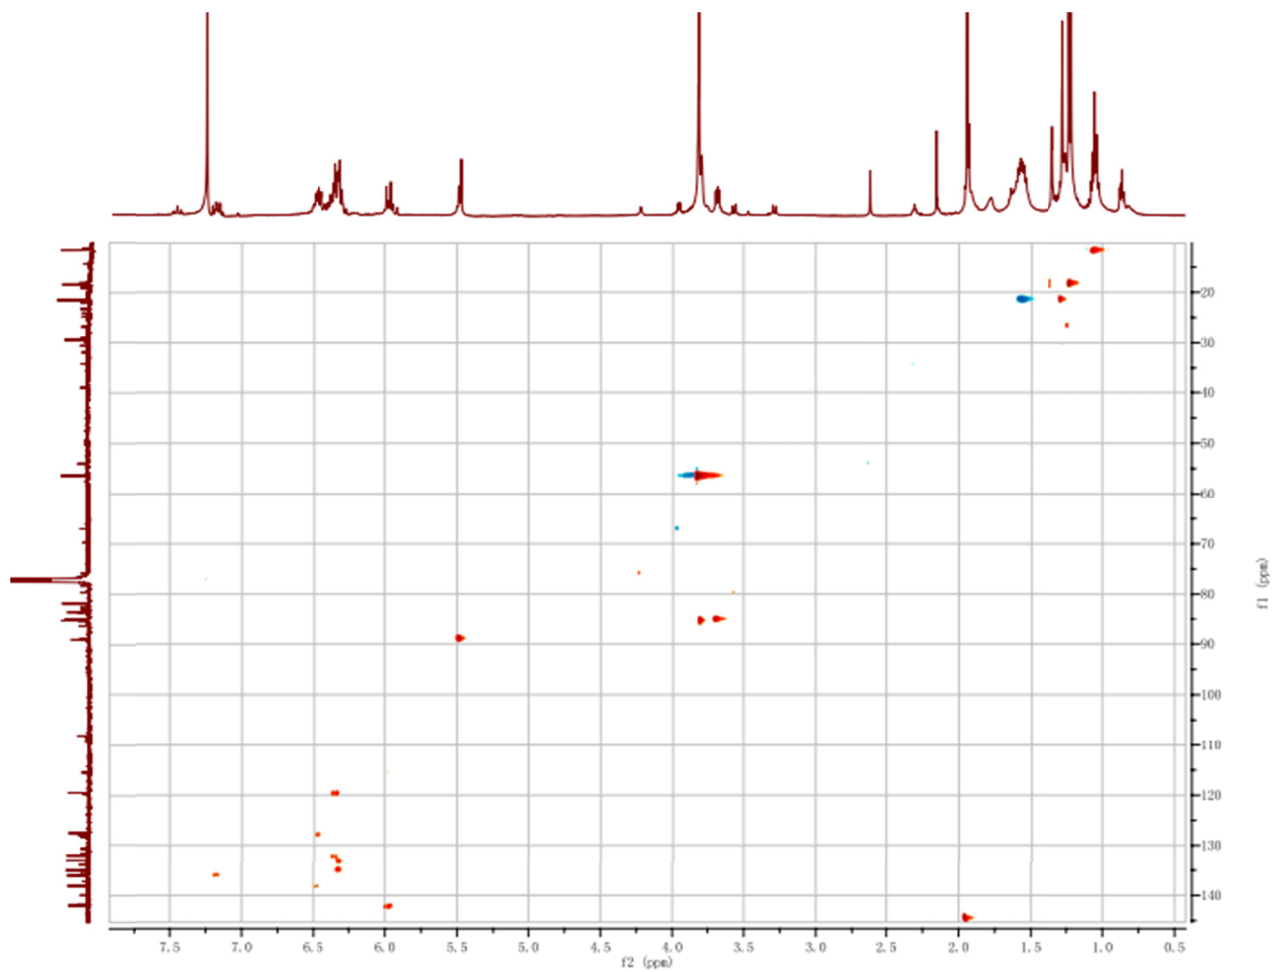

Figure S39. HSQC of compound 9 in CDCl<sub>3</sub> (500 MHz)

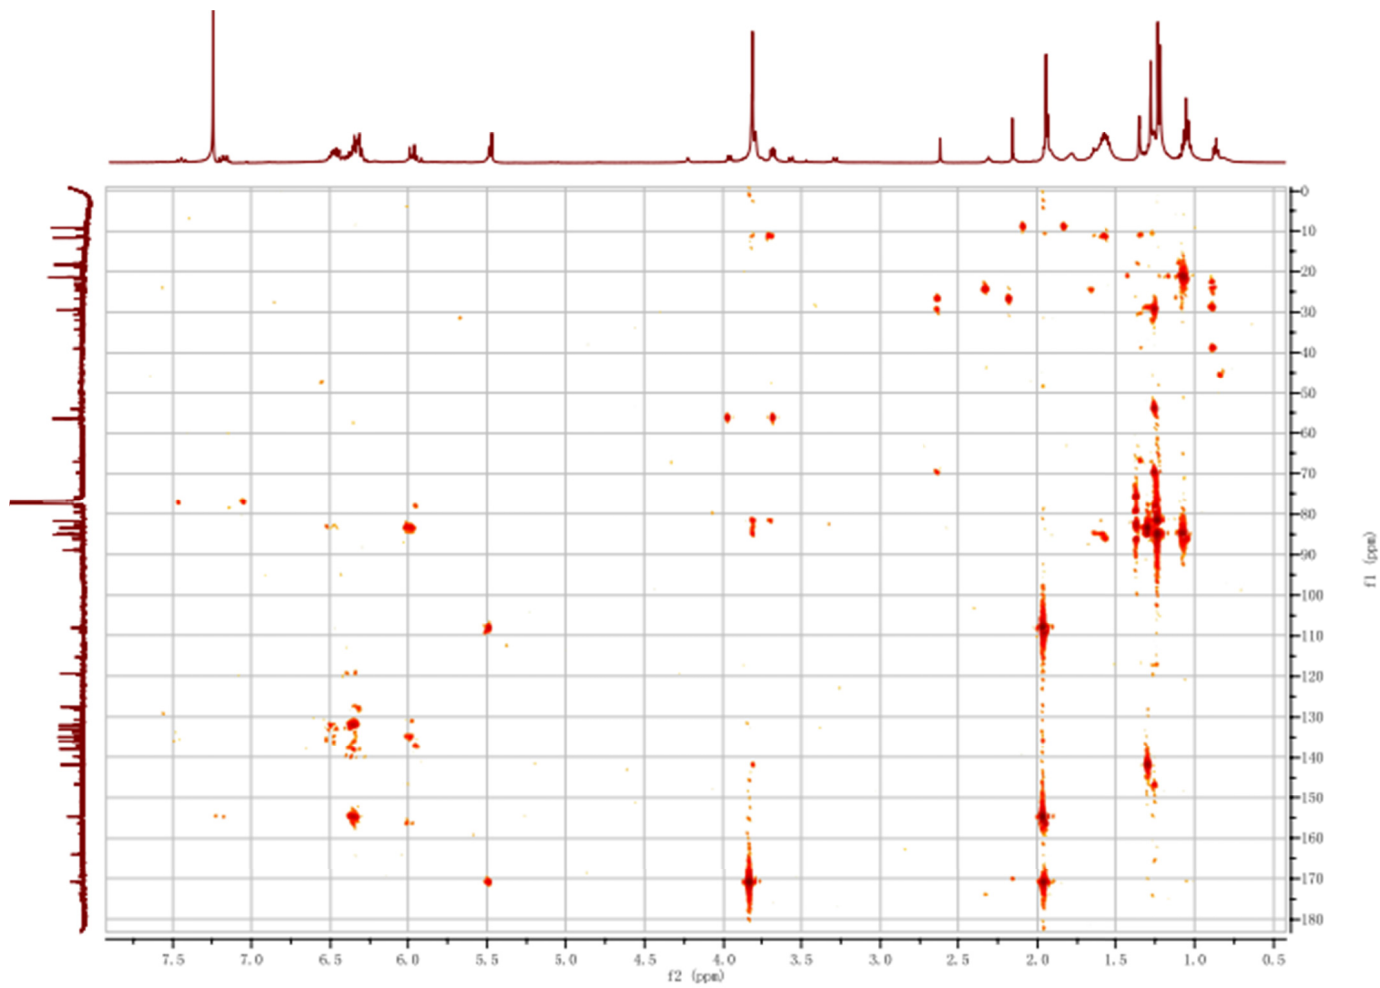

Figure S40. HMBC of compound **9** in  $\text{CDCl}_3$  (500 MHz)

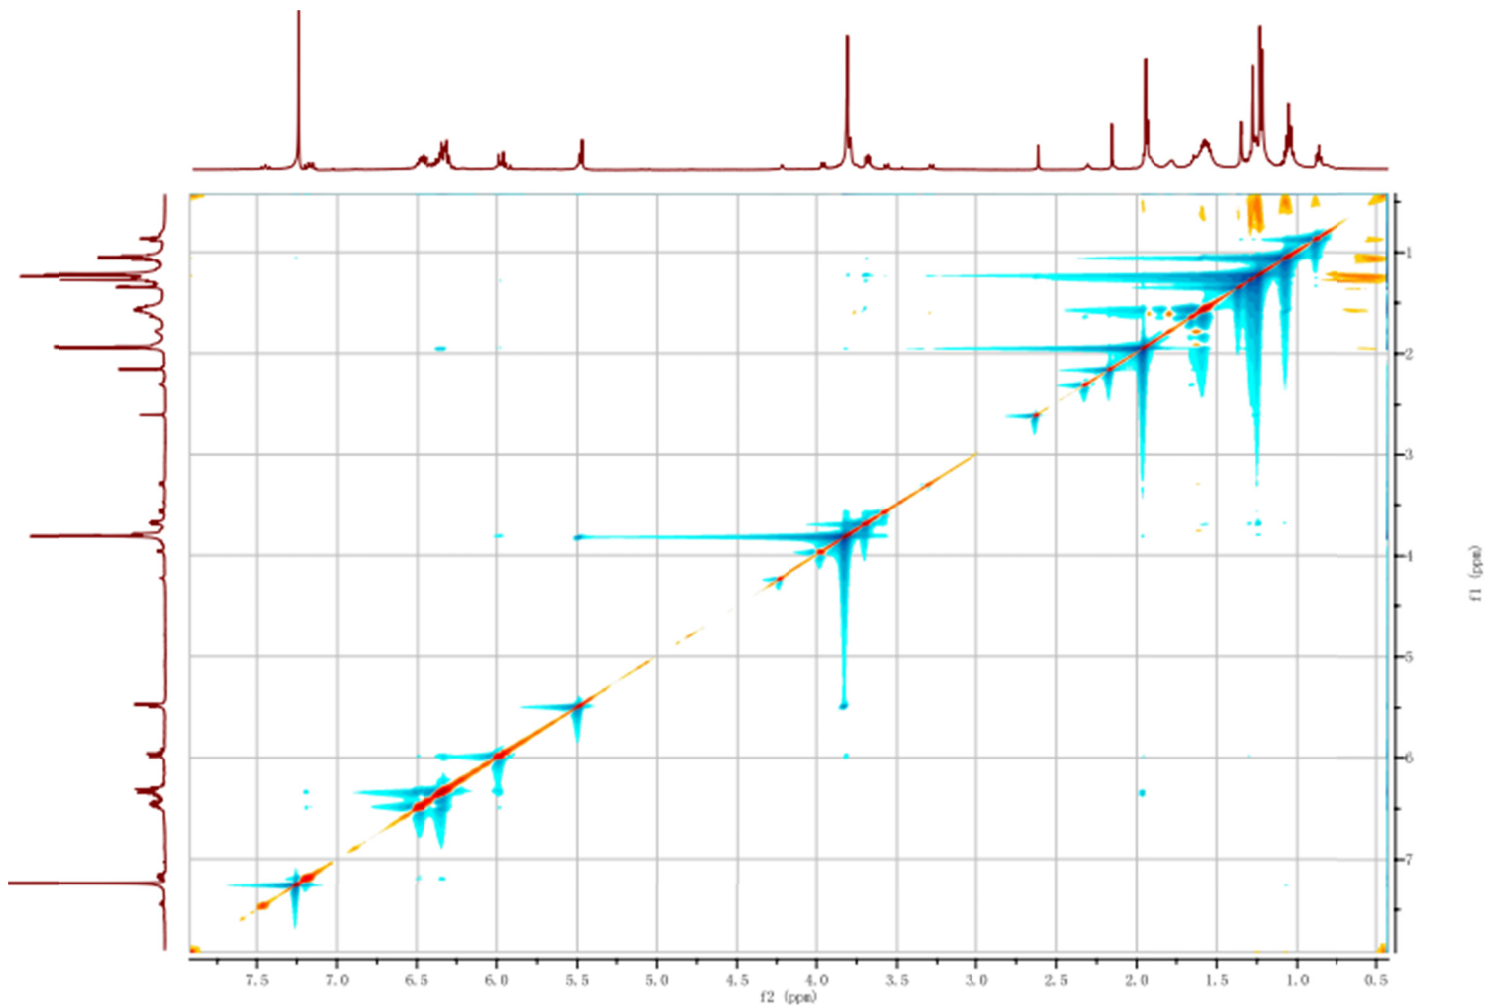

Figure S41. NOESY of compound **9** in CDCl<sub>3</sub> (500 MHz)



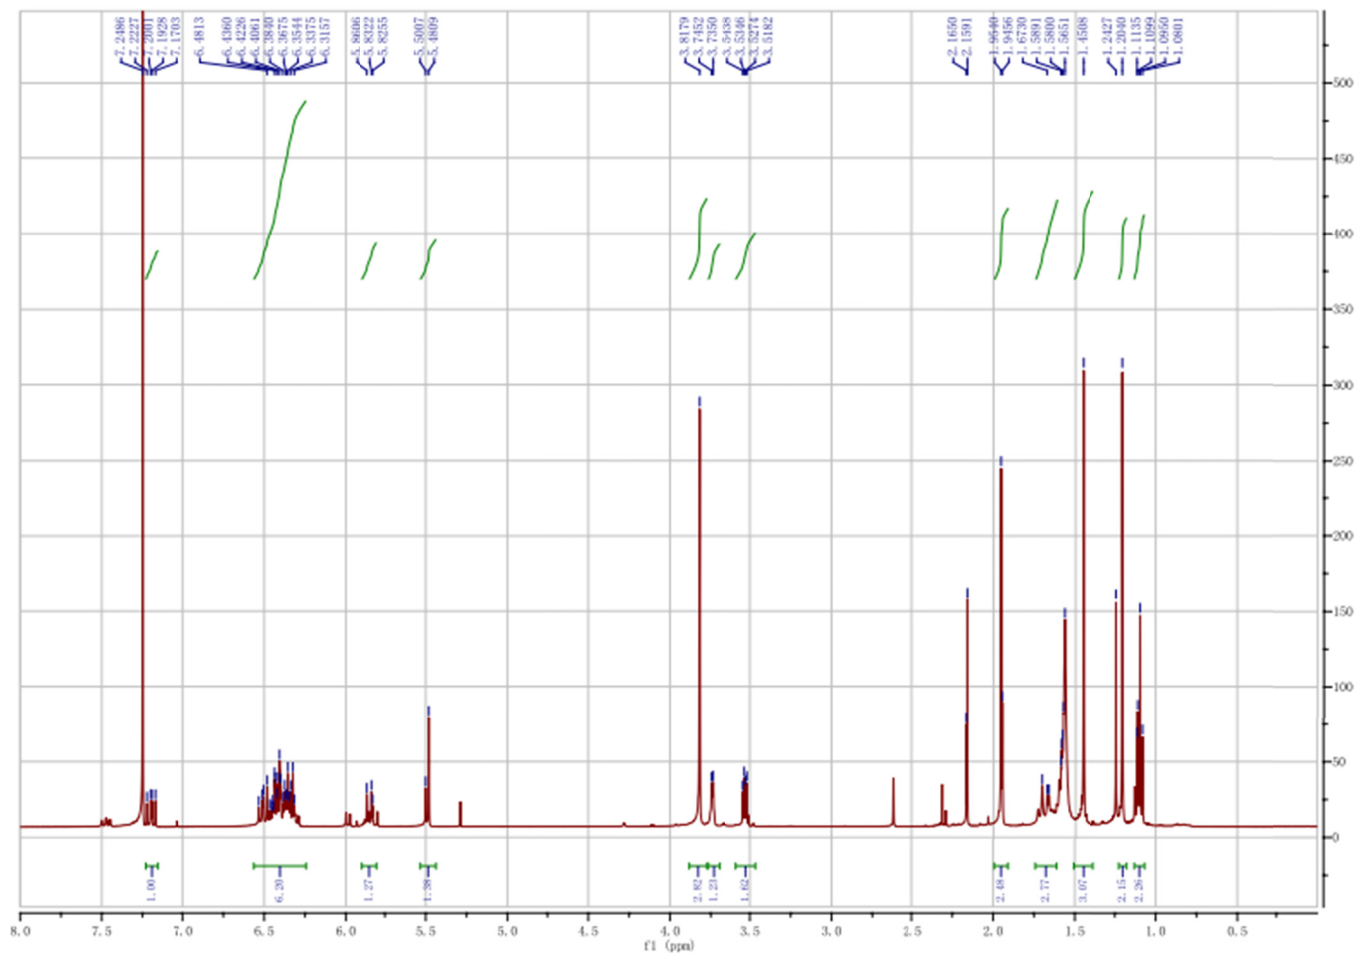

Figure S42.  $^1\text{H}$  NMR of compound **10** in  $\text{CDCl}_3$  (500 MHz)

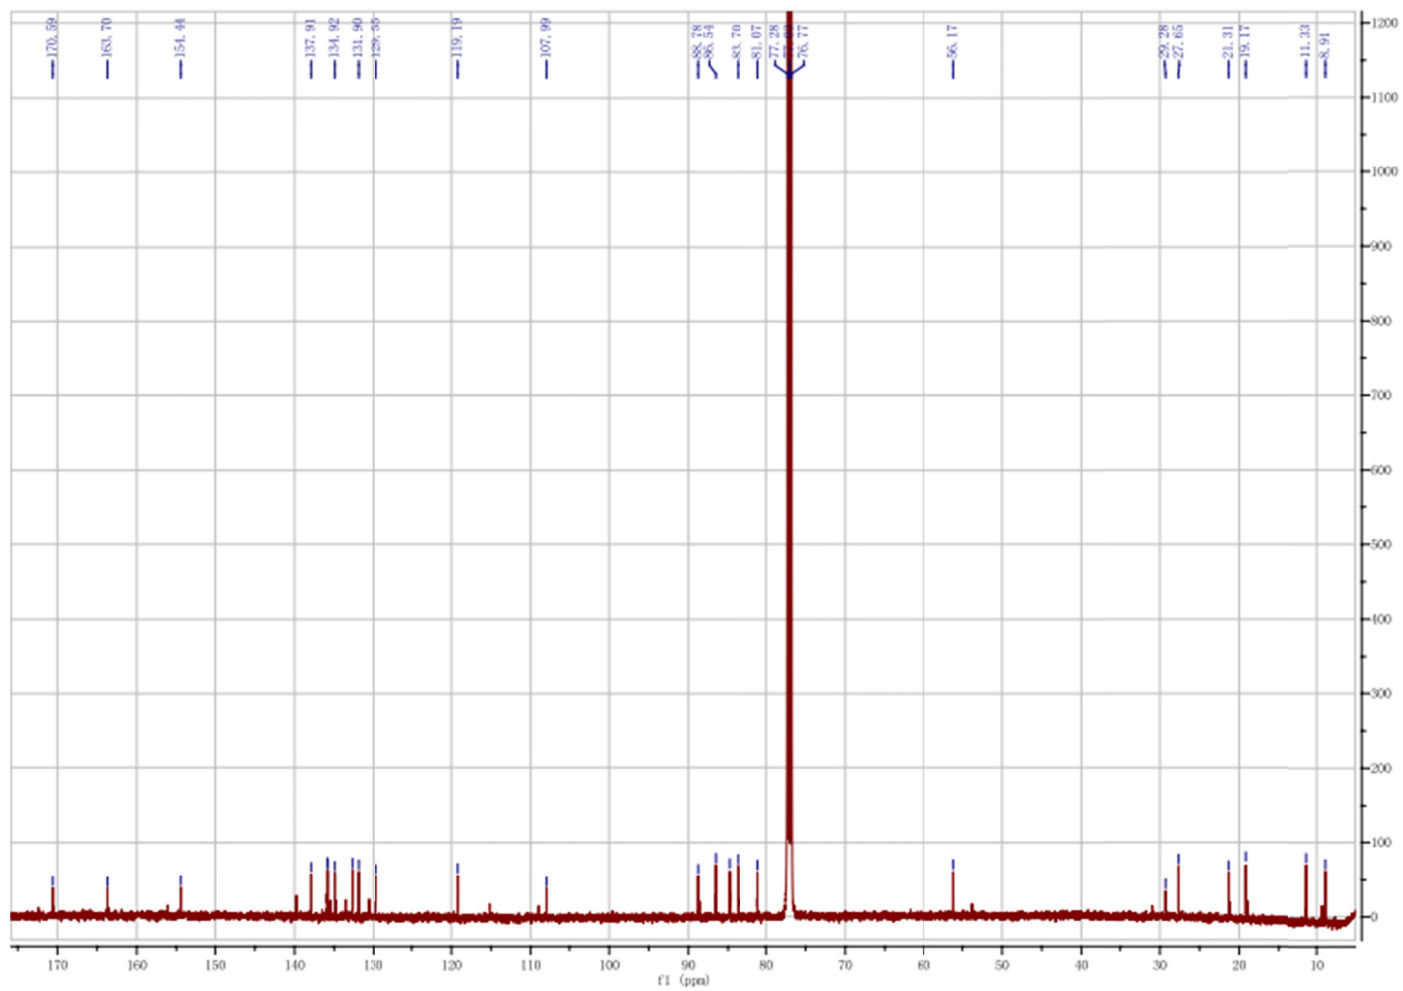

Figure S43.  $^{13}\text{C}$  NMR of compound **10** in  $\text{CDCl}_3$  (125 MHz)

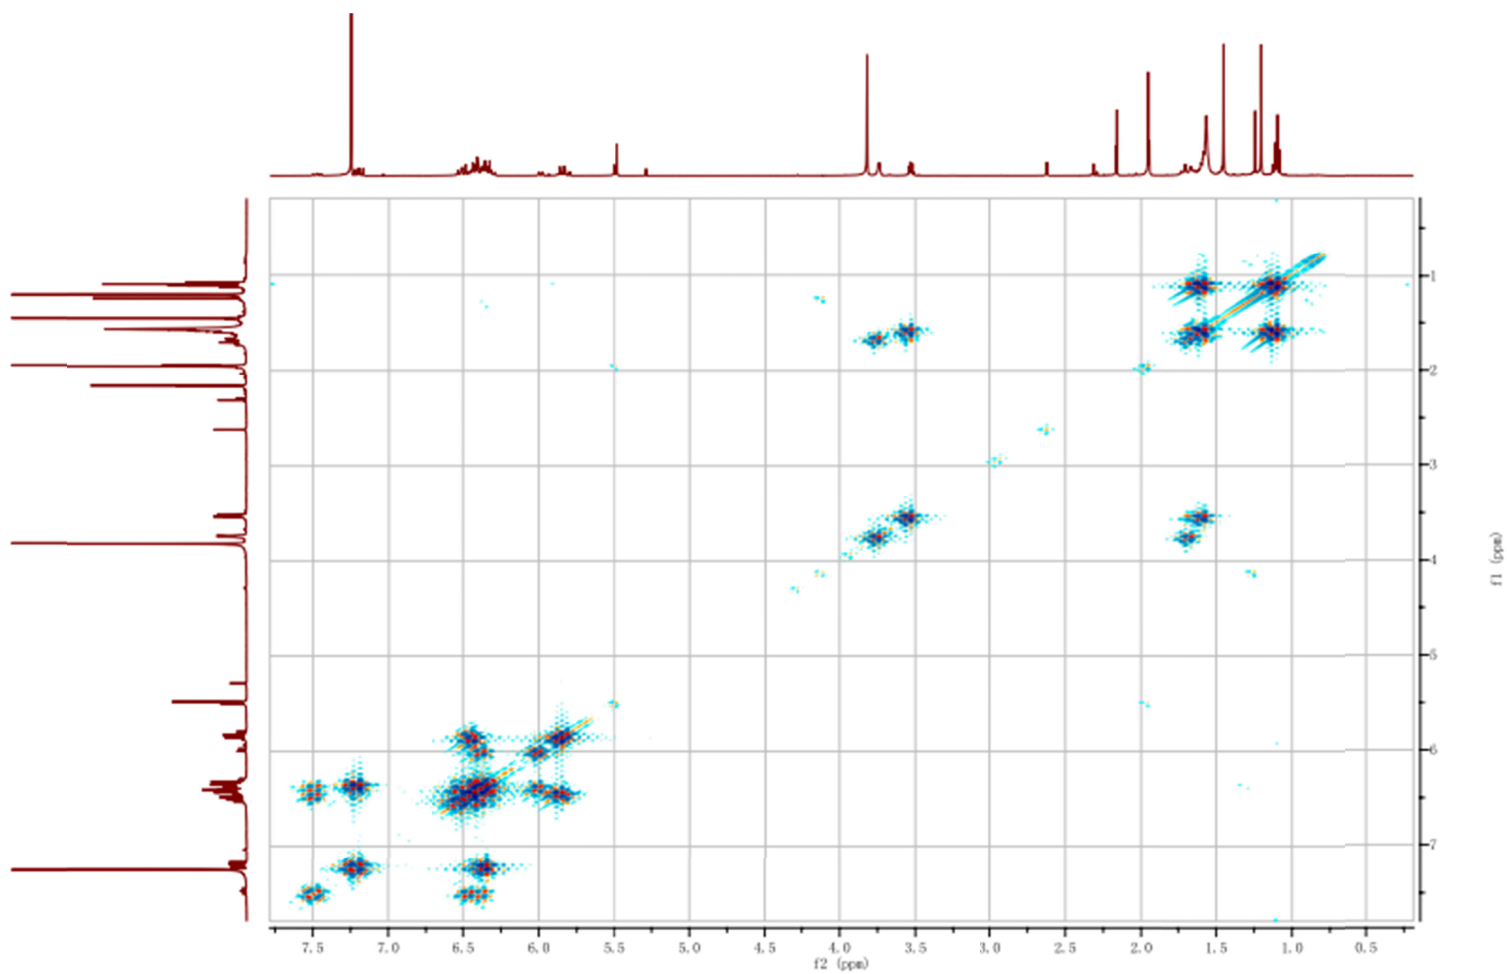

Figure S44.  $^1\text{H}$   $^1\text{H}$ -COSY of compound **10** in  $\text{CDCl}_3$  (500 MHz)

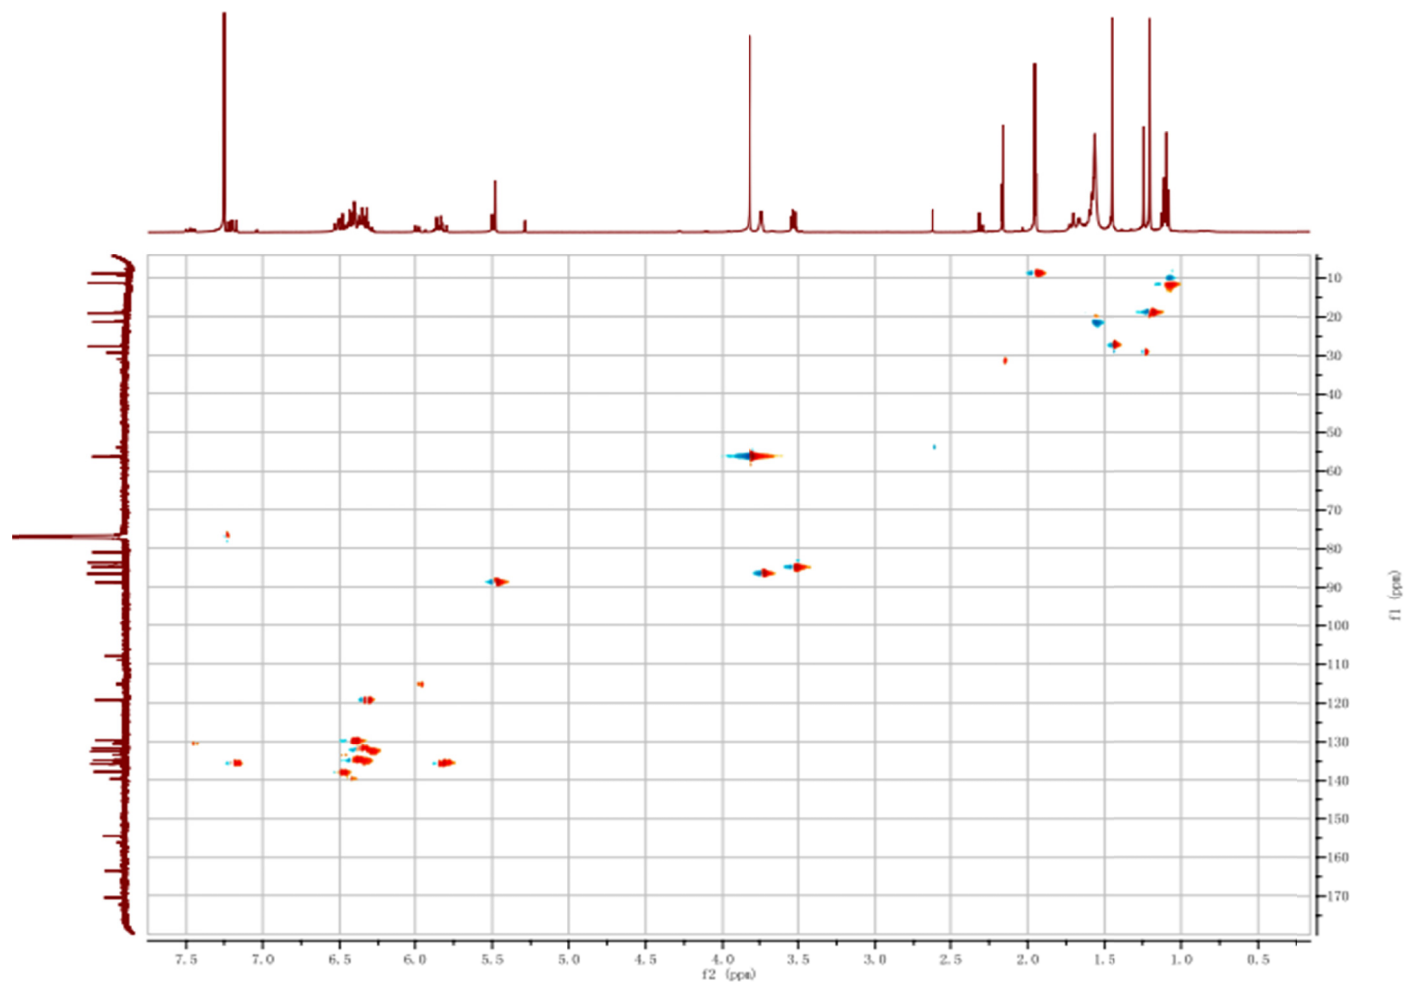

Figure S45. HSQC of compound **10** in CDCl<sub>3</sub> (500 MHz)

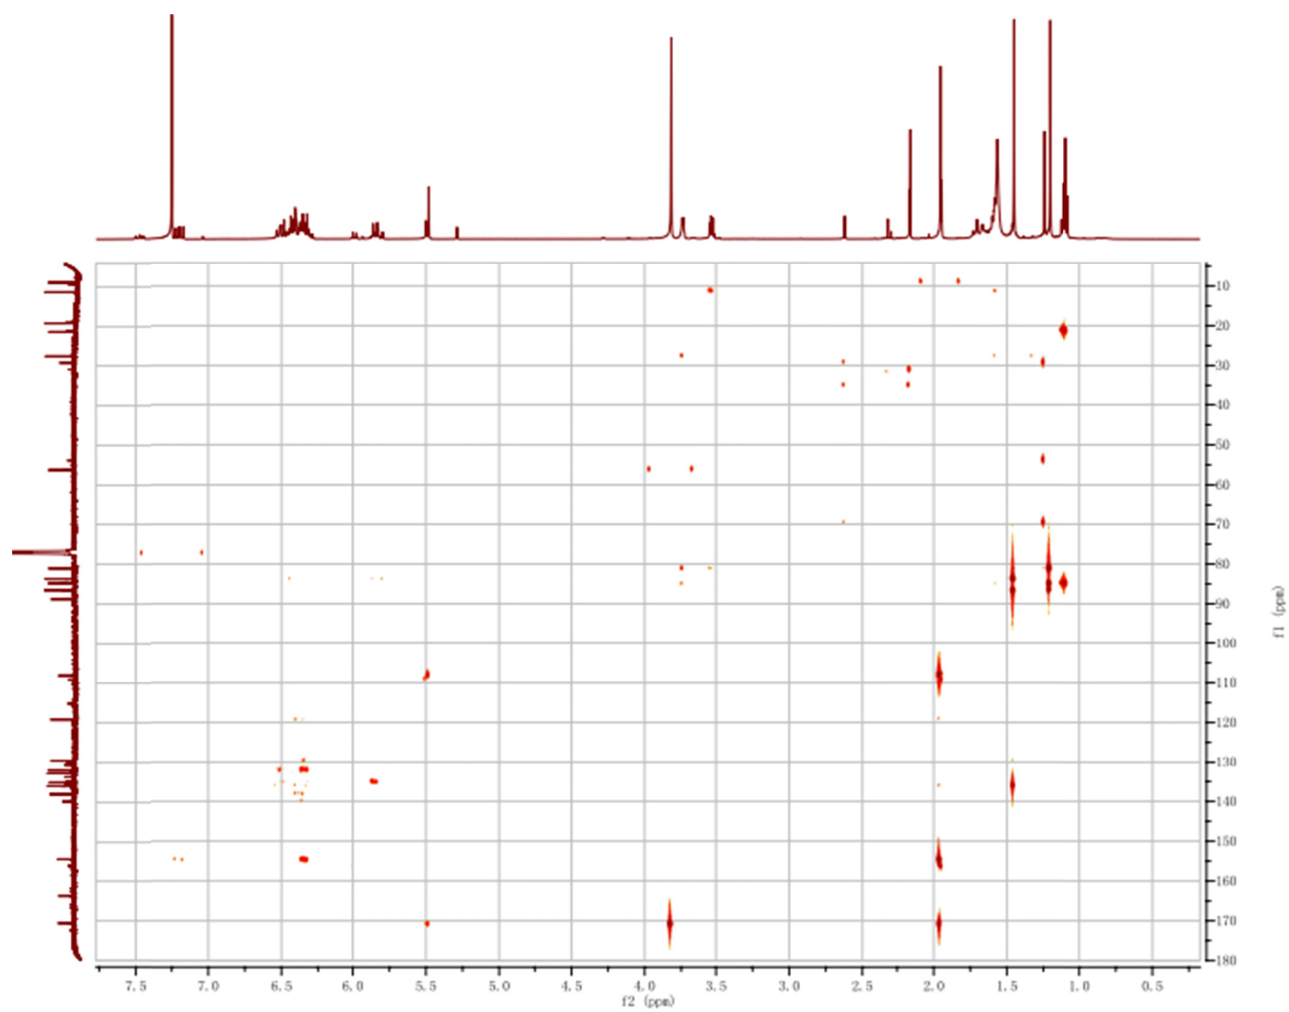

Figure S46. HMBC of compound **10** in CDCl<sub>3</sub> (500 MHz)

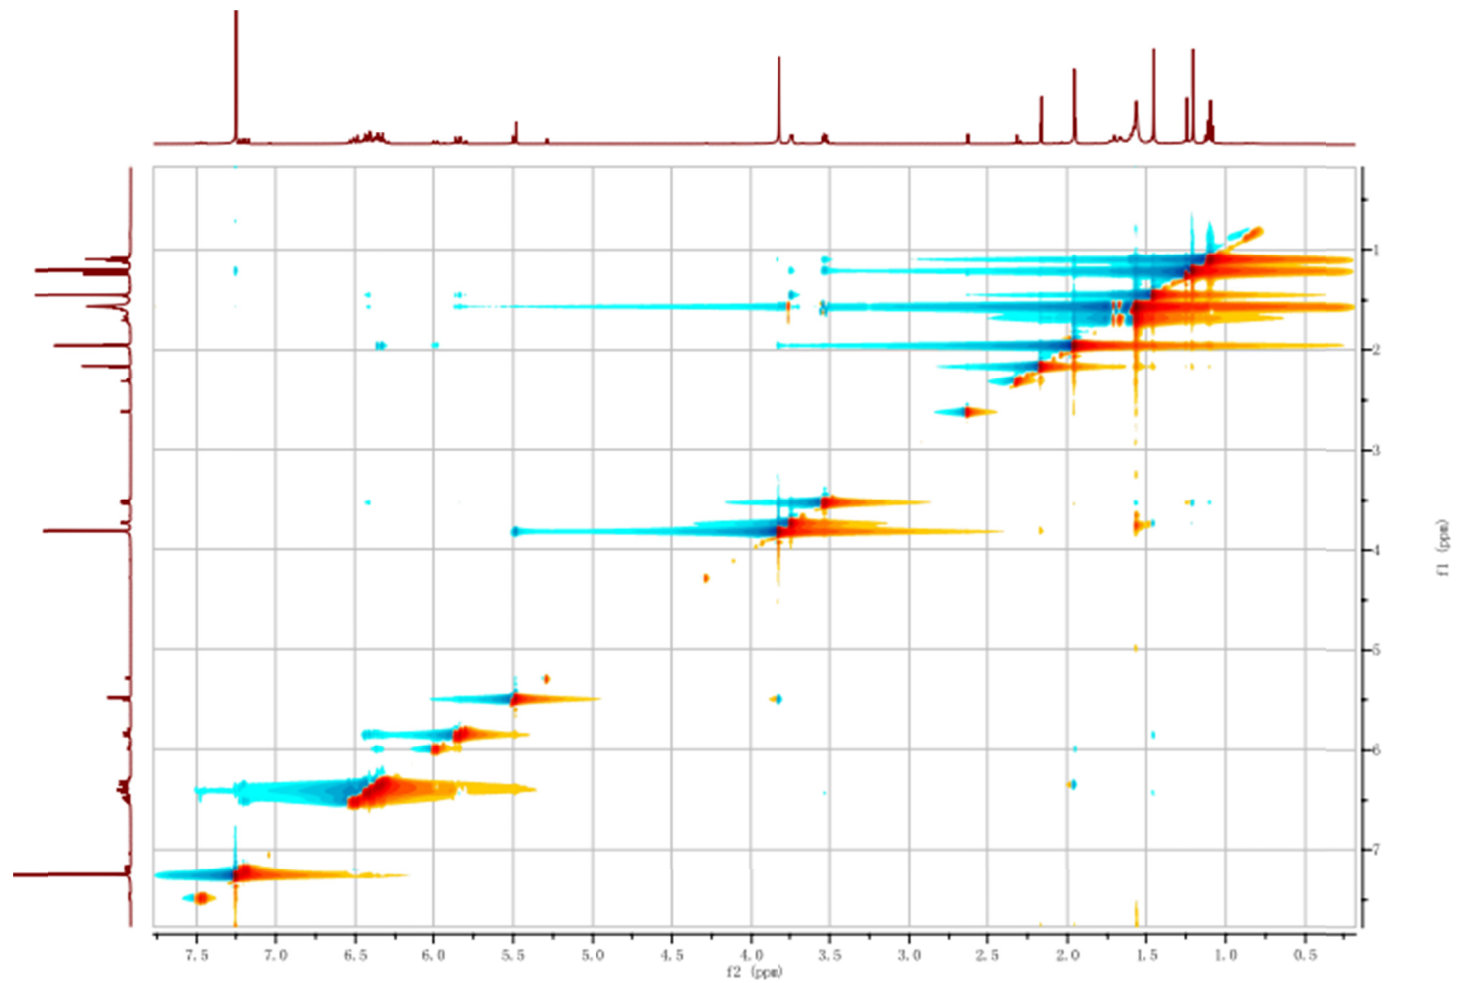

Figure S47. NOESY of compound **10** in CDCl<sub>3</sub> (500 MHz)

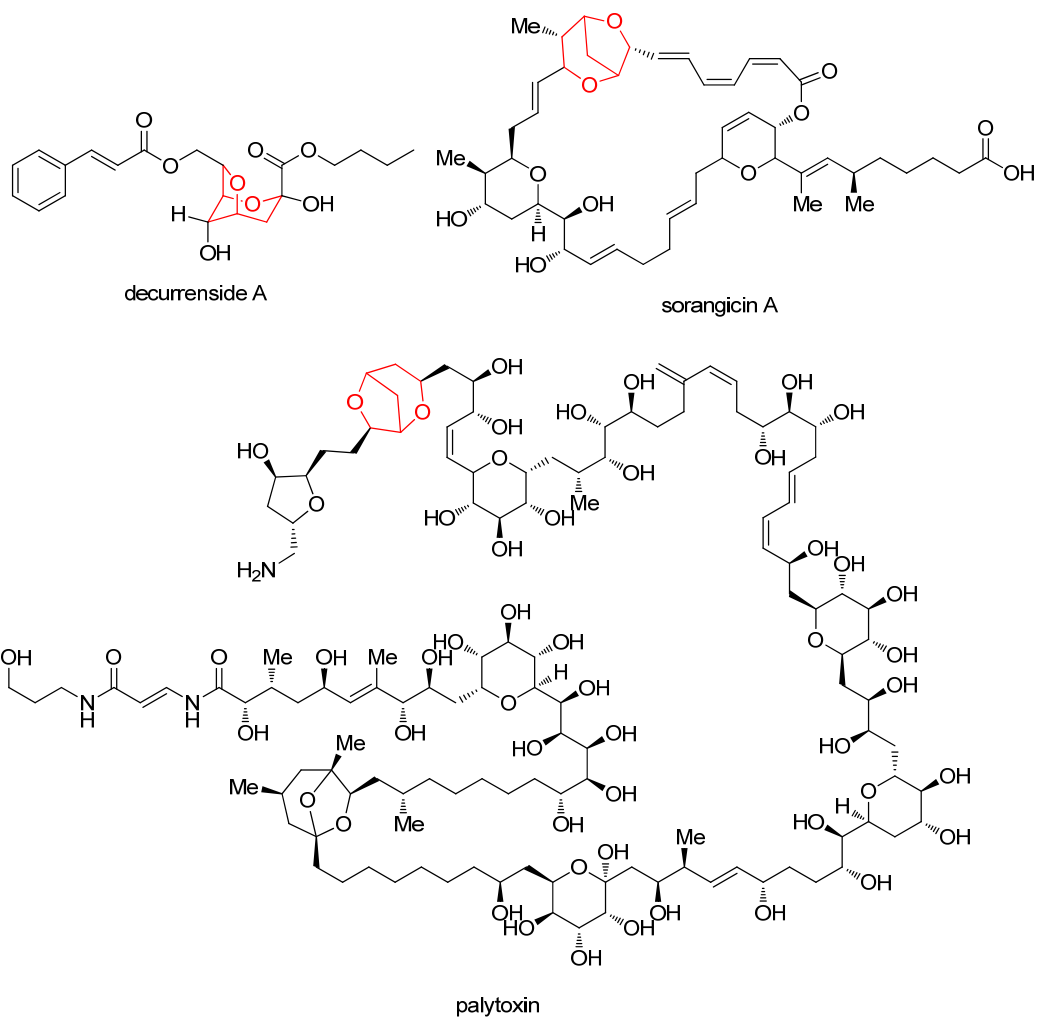

**Scheme S1.** Structures of decurrenside A, sorangicin A and palytoxin, which all contain a 2,6-dioxabicyclo[3.2.1]-octane (DBO) ring. The DBO moiety is shown in red.

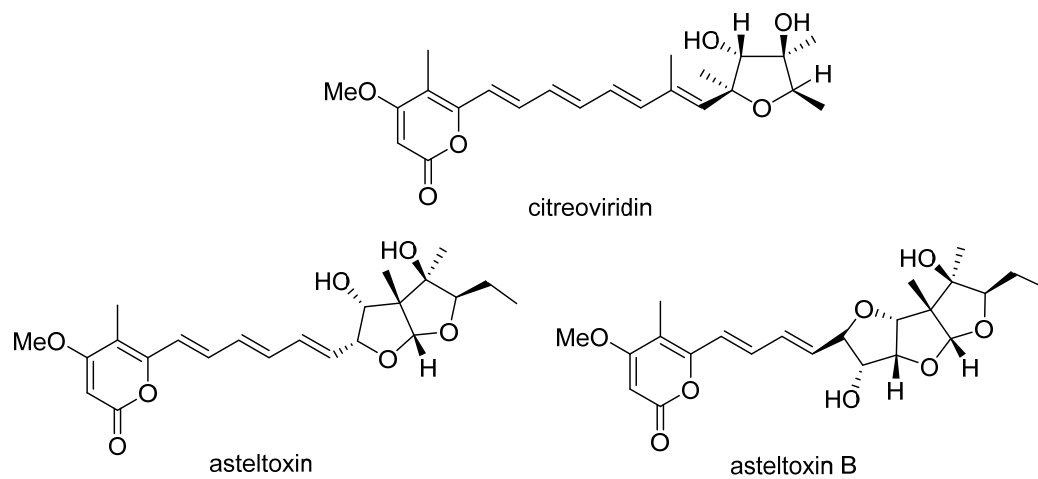

**Scheme S2.** Structures of citreoviridin, asteltoxin and asteltoxin B.



## Supplementary References

- (1) Ma, S. M.; Li, J. W.; Choi, J. W.; Zhou, H.; Lee, K. K.; Moorthie, V. A.; Xie, X.; Kealey, J. T.; Da Silva, N. A.; Vederas, J. C.; Tang, Y. *Science* **2009**, *326*, 589.
- (2) Sambrook, J.; MacCallum, P.; Russell, D. *Molecular Cloning: A Laboratory Manual (Third Edition)*; Cold Spring Harbor Laboratory Press., 2000.
- (3) Xu, W.; Cai, X.; Jung, M. E.; Tang, Y. *J. Am. Chem. Soc.* **2010**, *132*, 13604.
- (4) Punt, P. J.; Dingemans, M. A.; Kuyvenhoven, A.; Soede, R. D.; Pouwels, P. H.; van den Hondel, C. A. *Gene* **1990**, *93*, 101.
- (5) Yu, J. H.; Hamari, Z.; Han, K. H.; Seo, J. A.; Reyes-Dominguez, Y.; Scazzocchio, C. *Fungal Genet. Biol.* **2004**, *41*, 973.
- (6) Alexander, N. J.; Hohn, T. M.; McCormick, S. P. *Appl. Environ. Microbiol.* **1998**, *64*, 221.
- (7) Gravelat, F. N.; Askew, D. S.; Sheppard, D. C. *Methods Mol. Biol.* **2012**, *845*, 119.
- (8) Wang, F.; Luo, D. Q.; Liu, J. K. *J. Antibiot. (Tokyo)* **2005**, *58*, 412.
- (9) Guo, H.; Feng, T.; Li, Z.-H.; Liu, J.-K. *Nat. Prod. Bioprospect.* **2013**, *3*, 8.
- (10) Mulheirn, L. J.; Beechey, R. B.; Leworthy, D. P.; Osselton, M. D. *J. Chem. Soc. Chem. Commun.* **1974**, 874.
- (11) Steyn, P. S.; Vlegaar, R.; Wessels, P. L. *J. Chem. Soc. Perkin Trans. 1* **1981**, 1298.
- (12) Baldwin, C. L.; Weaver, L. C.; Brooker, R. M.; Jacobsen, T. N.; Osborne, C. E. J.; Nash, H. A. *Lloydia* **1964**, *27*, 88.
- (13) Frisch, M. J. et al. Gaussian 09; Gaussian, Inc., Wallingford CT **2013**. See Supporting information for full list of authors.
- (14) Zhao, Y.; Truhlar, D. G. *Theor. Chem. Acc.* **2008**, *120*, 215.
- (15) Tomasi, J.; Mennucci, B.; Cammi, R. *Chem. Rev.* **2005**, *105*, 2999.
- (16) Simon, L.; Goodman, J. M. *Org. Biomol. Chem.* **2011**, *9*, 689.
- (17) Grayson, M. N.; Goodman, J. M. *J. Org. Chem.* **2015**, *80*, 2056.
- (18) Overvoorde, L. M.; Grayson, M. N.; Luo, Y.; Goodman, J. M. *J. Org. Chem.* **2015**, *80*, 2634.
- (19) Hotta, K.; Chen, X.; Paton, R. S.; Minami, A.; Li, H.; Swaminathan, K.; Mathews, II; Watanabe, K.; Oikawa, H.; Houk, K. N.; Kim, C. Y. *Nature* **2012**, *483*, 355.
- (20) Legault, C. Y. CYLView, version 1.0b; Université de Sherbrooke: Sherbrooke, QC, Canada, **2009**; <http://www.cylview.org>.

## Full list of authors in the Gaussian09 reference

Gaussian 09, Revision D.01

M. J. Frisch, G. W. Trucks, H. B. Schlegel, G. E. Scuseria, M. A. Robb, J. R. Cheeseman, G. Scalmani, V. Barone, B. Mennucci, G. A. Petersson, H. Nakatsuji, M. Caricato, X. Li, H. P. Hratchian, A. F. Izmaylov, J. Bloino, G. Zheng, J. L. Sonnenberg, M. Hada, M. Ehara, K. Toyota, R. Fukuda, J. Hasegawa, M. Ishida, T. Nakajima, Y. Honda, O. Kitao, H. Nakai, T. Vreven, J. A. Montgomery, Jr., J. E. Peralta, F. Ogliaro, M. Bearpark, J. J. Heyd, E. Brothers, K. N. Kudin, V. N. Staroverov, T. Keith, R. Kobayashi, J. Normand, K. Raghavachari, A. Rendell, J. C. Burant, S. S. Iyengar, J. Tomasi, M. Cossi, N. Rega, J. M. Millam, M. Klene, J. E. Knox, J. B. Cross, V. Bakken, C. Adamo, J. Jaramillo, R. Gomperts, R. E. Stratmann, O. Yazyev, A. J. Austin, R. Cammi, C. Pomelli, J. W. Ochterski, R. L. Martin, K. Morokuma, V. G. Zakrzewski, G. A. Voth, P. Salvador, J. J. Dannenberg, S. Dapprich, A. D. Daniels, O. Farkas, J. B. Foresman, J. V. Ortiz, J. Cioslowski, and D. J. Fox, Gaussian, Inc., Wallingford CT, 2013.

## Supplementary Nucleotide and Protein Sequence Data

```

gene          1..8414
              /gene="aurA"
SOURCE       Calcarisporium arbuscula
CDS          join(1..432,548..928,1011..1143,1234..1356,1462..1663,
              1733..2549,2637..5701,5807..6609,6743..7252,7325..7403,
              7466..8414)
              /gene="aurA"
              /note="polyketide synthase"
              /codon_start=1
              /product="AurA"
              /translation="MTPEPIAIIIGSGCKFPGSSTSPSRLWDLISKPKDVASKPPADRF
              NIDGFYHPNPTNLLTTNAKESYFISENVRAFDNTFFNIAANEATSLDPQORLLLETVY
              ESVEAAGLRLEALRGSSTGVFCGVMCADWEAVVGLDKVVPEYAIISGLARSNLANRISY
              FFDWNGPSPMSIDTACSSSMVALHQGITALQSGECSAVAVIGTNLILTPNLYFAASNVH
              MLSPESRGRMWDHKANGYVRGEGVASLMLKRLSDAVADGDRIECVIRASGVNQDGRTL
              GLTMPGSEAQEKILIRSTYALAGLDPSRAEDRPQYFEAHGTGTQAGDYQEASGYNTFF
              GANPKASAEVVLHVGSIKTVIGHSEGCAGLAGLIKASLCIQHGLIPPNLHFERLNPKL
              EPYSSHLKVPTALTQWPELPSGVPRRVSVNSFGFGGTNSHAILESEYEPNLHGTTNGHV
              NGTSKKTNGLLNGASNLDSLTNGEESTKPALLPFVFSAASEKTLGALLEKYDSYLGE
              NPNVEAMDLAWSLIQKRSALMYRVTLYAPTIEGLQSEIQRELALRKANTPSTVISRPD
              TGKKRILGIFTGQGAQWPQMGLDIISTFPNARVWFEEELQASLDSLPTAHKPDFSLLEE
              LSAPKPSRRVQEAAVAQFICTAVQIVLVKLLSAIGISFDQVVGHSSGEVAAAAYAGVL
              NAHDAIRIAYLRGRVAHLAGANDKAGGMLAAGLSIEEATAFCELEPEFAGRIMIAACNS
              PSSVTLSGDADAIQEAEKHLKGQDKFARRVLDVTAHSHHMEPCSDPYLSAMTGCKIQ
              LGEPATTWYSTVYEGEKPNSSSHANALVGEYWKDNMRNPVLFYQALMQSITDAPPSL
              IVEVGPHPALKGPVLQAISEAVQTNSTIPYISTLSRGATGVKALAVTIGSLWTHLGAE
              GVKVEQYVALREPSRKLKFIHDLPSYFDHSQSYWTETRRSKAYLGRGPRHELGDLS
              EENTEGEWRWRNLFRRSNLEYLEGHQIQAQTIFFPATGYVAMAFEAGIMAEGRSMRLV
              QINDLEIDQAI AFLDDVKGIETLFRVYQIRSDGNVTNAAFSCHADIGGTLKTCASGQL
              VVTWGEANEALLPSKLPSPSGMSVVDTDEFYASLGKLGYGVTGLFRGITSLKRRKNTS
              SGFLDNVSGEELLLHPSTMDCGLQCLLAAVGAAPGDGELSRLQIPTRIQTTVINPIFCG
              KNNVLVGDLSLEFEAAVTGLSADGASGDVSLFTRDGPGLIQFEGVHVTPMLQPTASDDR
              PMFSEITWGGLLPNAEPLHGPAPPLQFWAGNMDDPQHMCFAVIQEVLSKLTAEADRQL
              EGYRVDVVEWFDHVVEQTRLGENPLCMKEWVDEDPTEALIHAKTAQPIIVEITDVIR
              KHFLNFLRGETPMIEVYRQDNLLTRFYDQEQELKYMSLRVGDVAGQLAFRYPRMKILE
              IGAGTGSATRAVLGRIGQYFHSYTFDTISAGFFEDAEATFEYADRMVYRVLDIEQDP
              TGQGFANDASYDLVIAANVLHATKYLEPTMNNVRRLLKPGGHLLIALEITNEHILQDALL
              FSAFEGWWLGKHDNRPWGPKISVPKWEELLRKTGFGGVQSI LPAPEKTEYSFWGYSTF
              VTQAINDRLEQLSEPSASDPATSIISTSDSSEKFGTLMII GGVTDKTSYLVPAKLL
              APSFERIIHTLTIDSIEYQDASLAAALCLADMVPTFQDLTDNKISCLKRLLEVGRRL
              LWVTAGSESENPYLSMSKGFLLSCIGYEYEGSIHQYLNIVDPEAVNAQI LSTTLMRMLL
              SDSTNDYLSLSTGVGSEIELELRLEDNMVKI PRIMNATPLNHRYAAGQRAVYSQADLEKS
              TVQIRSVQGNLEFFEGPVEGSTETQLDQGGSTIPVHVRYASLALKVQNGGFLNLVLG
              THEVSNVRLIAFSDNNASRVVPSALCWELTNNAIEDQEAQFLNIMASAVLARNI IQT
              ASTNTSLLVHEANDALRHAIWTQAVAKGVQPYFSTSDTSKQSNSTL VFHETSSTRA
              LARILPTGLSVIANFGKAAPNGVMAKIKPLLSPDVTQEDTGTLYRVSPLLSKGFNLDE
              VTQTFKVSRIVATEVMHSLANNFAAVHGETNVISIDKLSGRDAKTGELEILDWTQARE
              LPVRVSSASSQVKLSASKTYLLVARSRTPKVPEQWLDEMSRLGARVRIEPMVDTDRESI
              LSVDRTIRRTPPIIGVVNGAMVLQDRMFADATLDNII LGTYKPKVQGSRLLEDIYGDE
              DLDFLILFGSATAILGNMQSSYGAATNFMRSLIRGRERLNLVGSIIHPAEVRGVGYI
              SRMGIELSRLMKNKLVGSHIVSEKDLHETFAEAILAGKPASGRNPEVISGFNQHDPEEI
              PDLIWNPNPETWPLVNYRLQSTTSQSTSTLMPKIQQLESATSLAEAAELVLIALNAKI
              VQKLHLSSEDTHTPDTRLAELGADSLVAVDLRWFIRELDVEIPIILQIQSGASIGDLA
              NSATSKISDSLIPNVKR"

```

BASE COUNT 2110 a 2167 c 2075 g 2062 t

ORIGIN

```

1 atgacaccag agccaattgc cattattgga tcaggctgca aattccctgg gtcttctaca
61 tcgccatcgc gtctctggga tctcatcagc aagccaaagg atgtcgcac caagccccc
121 gcagacagat tcaatatcga cgggttctac catccaaatc caacaaatct attaacaa
181 aatgccaagg aatcatactt catctccgag aacgtaaggc cattogacaa cactttctc
241 aatattgcgg caaatgaagc gactagtgtg gatccccagc agcggctgct gctcgaaacg
301 gtttatgaat ccgtcgaggc tgctggctta cgattggagg ctcttcgggg ctccctccacg
361 ggtgtgtttt gcggagttat gtgcccagac tgggaagctg tcgtaggatt agacaaggtc
421 gtaccggaat atgtgagtgc tatccctttg aagatactct gaggcatctt gaagaccgaa
481 agatgatata catcctccga ctcccagtg ctctattgag agtcctgaca ctaacaactc
541 aaaccaggcc atttctggtc ttgcccggtc taactctggca aaccgtatct cttactttt

```

601 tgattggaac ggcccatcca tgtcaattga tacggcttgt tcttcgagta tggtagctct  
661 tcatcagggt atcactgcct tacaaagtgg tgaatgctcg gctgttgccg ttattggaac  
721 gaacctgatt ttaaccccca acttgactt cgcgcgctca aacgttcata tgctttcgcc  
781 ggagagccgt ggctcgatgt gggatcacia agctaattggc tatgtacgag gagaaggagt  
841 agcgtctttg atgctgaagc gactcagtga tgctgtgccc gatggcgatc ggatagaatg  
901 tgtaatcaga gcctcagggt ttaaccagggt atgcacccac actctattgc ttacggctcc  
961 tacttgagct caggctatcg aactgcatat tctgactgcg atctttctag gatgggcgaa  
1021 cactgggggt gacgatgcct tcaggtgagg ctcaggaaaa gttgatccgc tctacctatg  
1081 ccctcgctgg acttgatccg agtcgocgag aggatcgacc acagtatttt gaagcgacg  
1141 gcagtaagtt cattttatgt ctccatctct caatgtggca attaccttga aaaccttcca  
1201 cttttgtcca gtcatactta ccacggataa tagctggtag acaagctgga gattatcaag  
1261 agccttcagg tatctacaac actttctttg gggcgaatcc caaagcatcc gctgaagag  
1321 tgttacatgt gggatcaatc aagacgggta ttggctgtaa gttaatctct actcaccttg  
1381 agtctctcgc atctctgtat ccctttctcg cttgcttgac ttgaaggtat agatatactg  
1441 acctgaactt cccaattcaa gacagtgagg gatgtgctgg tttagctggc ctaatcaagg  
1501 catcttggtg tatacagcac ggtctgattc ctctaattc tcacttcgaa cgattgaatc  
1561 ccaactgga accttactcg tcgcatctca aggtgcctac tgcactcacc aagtggccag  
1621 agctaccttc cgggtgtcca cggcgtggtt cagtgaactc tttgtgagtt gaattctgca  
1681 tgaatttcaa agggcaagg aagaaatttt agctaactt cgttactctt agtggatttg  
1741 gtggcactaa ttcgcatgct atctctgaga gctacgaacc aaatctgcac gggactacaa  
1801 acgggcacgt aaatggcacg agcaaaaaga caaatggcct cttgaatggt gcaagcaacc  
1861 tgctagacag cctcacaat ggagaagaga gtaccaagcc tgcctctc ccatgtgtct  
1921 tctcggctgc gtcagaaaag acccttgggg ctctcttga gaagtacgac tcgtatctag  
1981 gggagaaccc gaactgtgaa gccatggatc ttgcctggtc cttgattcaa aaacttccg  
2041 ctctcatgta ccgctgacg ctttatgctc ctacgattga ggggctgcag agcgagatcc  
2101 agagagaact tgcgcttcgg aaagccaaca ccccatctac agtcatatca cggcccgaca  
2161 ctgaaagaa aagaattctt ggcacttcta ccggtcaagg tgcacagtgg ccccaatgg  
2221 gtcttgacat tatttcaact ttcccaaacg ctgcgctctg gtttgaagaa ttgcaagctt  
2281 cactagatag tctgccact cgcacaagc cagacttttc gttgctcgag gaactgtctg  
2341 ctccaaaagcc atcttctcga gtccaggagg ccgctgttgc gcagcccata tgcaccgcg  
2401 ttcagatcgt cctggtgaaa cttcttctg ccattggaat ttcctttgat caagtctg  
2461 gtcattcttc aggcgaggtc gccgctgcct acgctgctgg tgtgctaaat gcacacgatg  
2521 caatccgaat tgcctatcta cgaggaggg taagtcaata attcctctg aaatccgtt  
2581 ctcaagcttt ataatgcctc tctacttggg ttcaaggcac tgactttaca atataggtgg  
2641 ctcaacttgc tgggtctaata gacaaggctg gtggtatggt ggccgcgggg ctgtccattg  
2701 aggaagcaac tgcattttgt gaactgccg agtttctggt gcgtatcatg atagctgat  
2761 gcaactcgc atcagatgtc acgctctctg gcgatcgga tgcgattcaa gagcgggaga  
2821 aacattttaa aggcacaagat aagtttgcct gtcgggtgct ggtggacacg gcatacatt  
2881 cccatcacat ggagccctgc tccgatcctt acctcagtgc catgacgggg tgcaagattc  
2941 aactgggaga gccaacgcg actacatggt actcaactgt ctacgaggga gaaaagcca  
3001 acagttcaag ccacgctaata cgctcgtgg gagagtattg gaaggacaat atgcgcaacc  
3061 ccgtctctt ctaccaggcc ctcatgcaat ccattacaga cgcgccgctt agtcttatcg  
3121 tcgaagtctg accgcatcct gctctgaaag gcctgtttt acagggcatt tccgaggccg  
3181 ttcaaaacaaa ctccacaatt cttatatta gactctgag ccctgggtgag actggagtaa  
3241 aggccttgc agttaccata ggtctctgt ggacgcatc tggagcagag ggagtaaaag  
3301 tggaacagta tgtggccctc cgtgagccat cccggaagct gaaattcatt catgatttg  
3361 ctctctatcc ctttgatcac agtcagctc actggaccga gacgcgaagg tccaaggcct  
3421 acctcggctg gggaccacg catgaacttc tcggggacct tagtgaggaa aataccgaag  
3481 gaggatggcg ctggcgcaac ttcttgttcc gaagcaatct tgaatatctt gaaggacatc  
3541 agatccagcc ccagacgatc tttctgcaa caggctacgt agccatggca ttcgaagccg  
3601 cgggaatcat ggccgaggga agatctatgc gtctcgtaca gattaacgac ctcgagatag  
3661 accaagcaat cgccttcttg gacgatgtca aaggtattga aacgctattc cgagtgtacc  
3721 aaatccgatc cgatggcaac gtcacgaacg cagcattcag ctgccatgca gacattggag  
3781 gcacgctcaa gacttgcgca tctggccagt tggctgtgac ctggggcgag atggaagcga  
3841 atcttctgcc ttcaaaactt ctttctccat ccggaatgct ggtcgtagac acggatgat  
3901 tctatgcttc cttgggcaag ttgggctacg gctatacagg cctcttccgc ggcacacgt  
3961 cattgaagcg taagctgaac acttccagcg gcttccctgga caatgtgggc agcgaggagc  
4021 ttctgcttca cccctcaaca atggactgag gattgcaatg tctgcttgc gctgttgag  
4081 cgcccggtga cggagagcta tcacgtctcc aaataccaac ccgtatccag acgaccgtca  
4141 tcaatccaat cttttgtgga aagaataatg tgctagtagg cgattctctc gaatttgag  
4201 cagctgtcac aggatgtgag gcagatggag catccggaga tgtcagcttg ttcactcgcg  
4261 acgggcccgg tttgattcaa tttgaaggcg tccatgtaac tcccctgatg caacctacg  
4321 caagcgacga tcgaccaatg ttctcagaaa ttacatgggg cggctctctg cctaaccgtg  
4381 agcctttgca tggacctgca ccgctttgc aattctgggc tggcaatatg gacgaccgc  
4441 agcacatgtg ctttgacgtc atccaagaag tgctctcaa actgacagcc gaagacagc  
4501 agaggctgga aggataccga gtcacagctg ttgaatggtt tgaccacgtg gttgagcaga  
4561 cacgctggg ggagaatccc ctttgatgga aggagtggtt tgatgaagac ccgaccgag  
4621 ccctcattca cctggccaag acggcgcaac ccattattgt ggagataaca gacgttatta  
4681 ggaacattt cctgaatttc ctgcgcgccg aaacccgat gattgaagtc tatcgccag

4741 acaacctcct caccagattc tatgaccaag aacaagagct gaagtacatg agtcttcgag  
4801 ttggtgatgt ggctggacag ttggcgtttc ggtatccoacg catgaagatc ttggagatgt  
4861 gagccggaac tggctcggca actcagactg tcctcgggcy tatcggccaa tacttccatt  
4921 catacacttt cacagatata tcagctggct tttttgagga tgctgaggcg acgttcacag  
4981 agtacgcgca tcggatggtt tatcgggtgc ttgatattga acaggatccc acgggacaag  
5041 gctttgagc gaattcgtat gacttggcga tcgcagcaaa tgtgctgcat gccaccaagt  
5101 accttgagcc taccatgaac aatgtccgtc gtctgctcaa gcccgggcgc cacctcatcg  
5161 ccctagaaat cacaacgag cacattctac aggacgcctt gcttttcagc gccttcgaag  
5221 gatggtggct ggggaagcac gacaacagac cttggggccc caagatctcg gttccgaagt  
5281 gggaggaact tctcaggaaa acaggctttg gtgggtgca atcgatactt ccggctccag  
5341 aaaagactga gtattcgttc tggggctact cgacctttgt cacacaggcg atcaatgatc  
5401 ggctggagca gctcagcgag ccttcggcct ccgaccacgc cacgtcaatt atatcaactg  
5461 ccgactcttc agaaaagttt gggaccctga tgattattgg cggcgtaaca gacaagacct  
5521 cgtatcttgt tcccgcactg aaaaagctgc tggccccttc tttcgaacgg attatcata  
5581 ccttgaccat cgattccata gaatatcaag atgcgtcatt ggcagcagca ttgtgtttag  
5641 cagacatgga cgtgcgcgac ttccaagatc tgaccgacaa caagataagc tgcttgaaaa  
5701 ggttcgtacc ctctcccttg tagcgtttac cttttggcag tttatgggct accaggctct  
5761 gcttctgtt tatactgatt tccatatact gacaccgata ttttaggctg ttggagggtg  
5821 gccgaagatt gctatgggtc acagccggct ccgagtctga aaacccatac ctgagcatga  
5881 gcaaaggatt tctcagctgc atcggatatg agtatgaggg ttccatccac cagtacctca  
5941 acatttgtcga cccagaagct gtgaatgcgc agatcctctc gacaacctcg atgcgactgc  
6001 ttctgtccga ttccaccaat gactacagcc tttccacagg cgttggaaagt atagagcttg  
6061 agttacgcct tgaagacaat gtcatagaaga ttccccgaat catgaacgcg acaccgttaa  
6121 accaccgata tgctgcaggc caaaggcgag tatatagcca agccgacttg gaaaaatcga  
6181 ccgttcaaat ccgctctgtc caaggcaatt tggaaattctt tgagggcctt gttgagggtt  
6241 cgacagaaac ccagcttgat cagggtcaat ccacgattcc ggtccatgct cgatactcg  
6301 cctctctggc actgaaagtg cagaacggcg gattcctgaa cctcgtctcg ggaactcatg  
6361 aagtctcaaa cgttcgcctg atcgcctttt ccgataataa tgcatcaagg gtctcagtac  
6421 cttcagcttt gtgctgggag ctcactaaca atattgcca ggatcaagag gcgcagttct  
6481 tgaacatcat ggcgtctgca gtgtagcca gaaacataat tcagacggcc agcacgaaa  
6541 caagtttact ggtccacgaa gcaaacgatg cactcagaca tgccatttgg acccaagctg  
6601 ttgccaaggg taagcacaaa gatgacttgc acccgttgtt accaaagcac tcttcaccaa  
6661 ttcacaatgt ccctacgcga agtggcagtt tcctctctcc cattttgatt tgaacaaaag  
6721 ctgactctaa tactctactt aggggttcaa ccataattca gcacaagcga cacttctaaa  
6781 aagcagtcga actccagcac cttggttttc catgagacaa gctcaactcg agcgcttgcc  
6841 cgaattcttc ctacaggtct ttcagtcatt gcaaaacttg gcaaaagcag ccccaacgga  
6901 gtaatggcaa agatcaagcc acttctctct ccggatgtaa cacaagaaga cacaggtacc  
6961 ctctacaggg tttcgccttt gctctcgaag ggtttcaact tggatgaggt aactcaaa  
7021 tccaaggtct cacgtatcgt ggcaccgaa gtgatgcaat cttggcaaa caatttcgcy  
7081 cgggtgcatg gtgaaaccaa tgcctcagc attgacaagc tttctgggcy agatgcaaaa  
7141 actggtgaac tggagatcct ggactggacc caagcgcgtg agctaccagt aagagtttct  
7201 tctgcaagct cacaagtcaa actgtcggcc agcaaaacct atctcctggt tggatgtcg  
7261 ggcgatctcg gacaatccgt ttgccactgg atgatcacta gaggagcagc aaatatggtc  
7321 ctgcccagtc gcacaccgaa agtagagcca caatggcttg acgaaatgct gagattggga  
7381 gccagagtc gaatagagcc tatgtaagtt tggcattcaa agaagcatgt aagaaatggt  
7441 ttatccgtac taacaacca aacagggacg tcacagaccg agagtctatc ctcagtgttg  
7501 atcgactat tcgctggact ttgcctccca ttggcggagt tgtgaatggt gccatgggtc  
7561 tgcaagatcg aatgttcgca gatgctacgt tggacaacat cctagggaca tacaaccaa  
7621 aggtccaagg tagtcgctt ctggaagaca tctatggtga cgaggacttg gacttctca  
7681 tcttgttcgg gtctgcaact gccatcctag gtaacatggg acaatcctca tacggagctg  
7741 ccacaaactt tatgaggagc ttgatccgtg ggcgacgaga gcgaaatcct gtggcgagta  
7801 ttatccatcc agctgaagtc cgtggtgctg gctacatttc gcgcatgggc atcgagctat  
7861 cgcgactcat gaacaagctc gtcggcagcc acattgtctc cgagaaggac ttgacgaaa  
7921 catttgccga agctatcctc gctggttaagc cagcgtctgg tcgcaatcca gaagtcat  
7981 ctggttcaa tcaacacgat cccgaggaaa taccgatctt ttttggtag agcaatccgg  
8041 aaacatggcc acttgtcaat tatcgattgc agtccaccac atcgcaatcg acgagcagc  
8101 tcatgccaat caagcagcag cttgagtcgg ccactagttt ggcagaggca gcagagctag  
8161 tactaatcgc cctcaacgca aagattgtcc aaaaagctgca tctctcggag gatacacaca  
8221 tgaccccaag taccagattg gcggagctgg gcgctgatag tttggttgcg gttgacttgc  
8281 ggacctggtt tattagggag ctggacgctc aaattcccat tctgcagata cagagcggag  
8341 cctcaatcgg tgacctcgtt aacagcgcca cgtctaagat ttcagacagc ctcattccaa  
8401 acgtgaagag gtag

```

gene            1..693
                /gene="aurB"
SOURCE         Calcarisporium arbuscula
CDS            1..693
                /gene="aurB"
                /note="O-methyltransferase"
                /codon_start=1
                /product="AurB"
                /translation="MTKESADNYNPLMLWGYDVFVQVLTNSFWWRCSTKGILVPPFL
DNSTTNHMEVGAGTGYFLRAKLDHERSKLKSSDDKTLWPQNLTLVDFHERCMNKAANR
ISPVRPNRVLANIMEPIPLKGQKFDSIAIMYVLHCIAATPEAKGRVFANLKPFLADEG
TLFGSTVLGKGVKHNLIIGGFLMWLYNYIGMFDNWDGKEDFLKPLREHFVEVSEVVG
TVLLFKAEKPRH"
BASE COUNT    168 a   173 c   173 g   179 t
ORIGIN
   1 atgaccaaag aatccgcgga caactactat aaccccctta tgctatgggg ttatgatgtc
  61 ttgtccagg tcctcaccaa ttccttctgg tggcgatggt caaccaaggg catcctcgtc
121 cttttttttc tcgacaacag tactaccaac cacatggaag ttggagctgg aaccggttac
181 ttctcccgcg ccaaactcga ccatgagcga agcaaaactga agagcagcga tgacaagact
241 ttgtggcctc aaaatctcac acttgttgat ttccatgagc ggtgatgaa taaagccgcg
301 aaccgcatct ccccggttcg cccaaccgc gtactcgcca acatcatgga gccaattcct
361 ctcaagggcc agaaattcga ctccatgcc atcatgtacg tcttgactg tattgctgcc
421 actccagagg ccaaaggccg ggtattgcc aactgaagc cgttccttcg cgatgagggt
481 accctgttcg gttcgacggt cttgggcaag ggagtgaagc ataactgat cggtggtttt
541 ttgatgtggt tgtataacta catcggcatg tttgataact gggacgatgg gaaagaagat
601 tttttgaagc ctttgaggga gcattttgaa gttggtgaga gtgaggttgt tgggactgtg
661 ctgctcttca aggcagagaa gccagacat tga

```

```

gene          1..1629
              /gene="aurC"
SOURCE       Calcarisporium arbuscula
CDS          join(1..293,366..637,687..1057,1111..1629)
              /gene="aurC"
              /note="FAD-dependent monooxygenase"
              /codon_start=1
              /product="AurC"
              /translation="MGAYSFRVIVGGSITGMTLAHCLDRAGIDYVILEKHKDIFAEP
GISIGLMPNGSRILEQLGIYSDVHALFEGIKKIYQYMPDGYCIETDSPVINIVDRFGLP
FCVIDRYQFLKVLYSKFEDKSRFHMNKKVTSICHGKSDVSVTTADGETYHGDLVVGAD
GVHSVVRSEMRIGNLARPGFVTEREKSELAEFACVFGVAKAVPGQGRWEHILRYNE
DFCFMFFPASGTDVFFNVIYKLNQKYVYDPIDPRFTKEEGIEVCESVGDFFVWEDVKFR
DIWAQRIAFTCVPLEEHMFKNWHHRRICVGDVSVKMSPNMGQGGNTAIESAAALTNG
LRKLVTSNYPDKPSERQLSNTLETFRNQFKRLNTHVGDARYVTRLEALDGTLLKRVFA
RYVMGHCGDLLVGNLARIIVAGGGVLDLFIPLTARSGKDWPPCFWQHSWGISSESIDFCKK
FAVASLIVLIVLALALDSPAAGLSSGIRSSWSF"
BASE COUNT   394 a   383 c   438 g   414 t
ORIGIN
   1 atgggagcgt attcattcag ggaatacatt gtaggggct ccattactgg catgaccctg
   61 gccattgcc ttgatcgcgc tggcattgac tatgttattc ttgagaaaca caaggacatt
  121 ttgagagcag ctggaatttc cattggactc atgcccacg gctcccgcac cttggagcag
  181 ctaggaatat actcggacgt tcacgccctc tttgagggta ttaaaagat ataccaatac
  241 atgcccgatg ggtactgtat cgagactgac agtccagtca acatagttga taggcaaggc
  301 tctgcttccc aaaaaaaaaa gaagaagaaa aaaaagagaa aaacctggag ctgactagcg
  361 cataggtttg gcttgccatt ttgtgtcatt gacagatata aattcctcaa agtcttgtac
  421 tcaaagtttg aggacaagtc ccgatttcac atgaacaaaa aggtcacgtc catctgtcac
  481 ggcaaatcag atgtctctgt cacgacagca gacggggaga cgtaccacgg cgatcttctc
  541 gttggagcag acggtgttca cagcgttcta cgttctgaaa tgtggcggat tggaaacctc
  601 gcgagcctcg gttctgtcac tgaacgggag aaatctggtg agtcgacctg cgaatcccat
  661 cagcgggtga gctgaagaag ttttagaatt ggctgcagag ttcgcatgcg tgtttggagt
  721 ggccaaagcg gttcctggcc agggctcgtg ggagcacatc ctccgataca atgaggattt
  781 ctgcttcacg ttctttcccg caagcggcac agatgtcttt ttcaacctca tttataagtt
  841 gaatcaaaag tatgtgtatc ccgatatccc gcggtttact aaagaggagg ggattgaagt
  901 ttgcgaatct gtcggggatt ttcccgtctg ggaggatgtc aaattccgtg acatatgggc
  961 acagaggatc gctttcactt gcgtcccact ggaggagcac atgttcaaga actggcacca
 1021 ccggcggata atctgtgttg gggacagcgt cagcaaggtc cgtcctcttt gcgtcttctg
 1081 tgtgcatggt gaaagtgtta actcggacag atgtctcaa acatgggaca aggcggcaac
 1141 actgcgattg agtctgcggc ggccttgaca aatgggctcc gtaaactggt cacttcaaat
 1201 tatccagaca agcgtctga gcggcagctc agcaacacgc tcgaaacctt caaccggaac
 1261 cagttcaaac gctgaatac tgtccacgga gatgcacgat acgtcactcg gcttgaagcc
 1321 ttgatgggga cactcaagcg cgtcttcgca cgctacgta tgggccattg cggagactta
 1381 ctgtaggca atcttgctag gattgtggca ggcggtggcg tgttgactt catcccgttg
 1441 acagctcgtt ctggaaaaga ttggccgcca tgcccctggc aacctcctg gggaaatcctg
 1501 gagtcgattg acttttgcaa gaagtttgct gtggcttcat tgattgtttt gatagtggtt
 1561 ttggcccgcg ctcttgatag tccagctggc ctgtcgagcg gcatcagatc ctccagttgg
 1621 tccttctga

```

```

gene            395..1617
                /gene="aurD"
SOURCE         Calcarisporium arbuscula
CDS            join(395..732,804..1617)
                /gene="aurD"
                /note="alpha-beta hydrolase"
                /codon_start=1
                /product="AurD"
                /translation="MPQSTKYILPVYGILALYSLGYFSYRNGYVNVLEERQAWLDMP
PGDPTKVAQPTGIASLDETLAAMFVFWPVL DGSFPGLSLMFCNYL GALPLCLVLMTL
ESLRKGNRSSFSFFYSPTFWGMIAVMMTLAVSIPWYLT IHLLISTASHPTIENMSIP
LAELKALIVNIVVGLVLP SLLVALPETITQTLFTRQTAITLWQLWFFWSTAVHFIARK
FISATERGADSRQWTRVRS AFRSVYGLTFAAAAIAHIATWSISLTAAYALPDAMSAE
TVSSLHPQTVFVNTWPWLPVTDSV GEGTLWLLQWDFVGVGAIYWWSLDLYRAAHTA
QRKKINWYYFALKTVAFCLVSGFTGATIE LLWEREEMIMEAGRAKEKTK"
BASE COUNT    391 a   406 c   386 g   434 t
ORIGIN
    1 atggcctggt acgacgaggg gtcaacctgc ttgctcctc ctagaccag acgttggtg
    61 ggtgtattag aaaaagaaaa cgtatttcaa aaaaagaata cccacatata ttagctgggt
   121 agtatgggca gtatgggcta tcttgagcta tgagctagtt cgttgataaa actcaacgaa
   181 atgctgcagg caatctgcaa tgccactcaa cctcgccccc acccatatct agatagtcag
   241 tcgtattacc ccgaccgcgg attgtctgat gaagcaaagc agcgaggact tgaatggctg
   301 ttcgcgctgc tcaaaaactc aaggcatcca tgcgttcaac cttttaatat tccgaatttc
   361 tgttaccagc aacgacactt tccactcagc acgtatgcct caatccacga aatacatctt
   421 gccagtctat ggcattttgg cgctctatag ctttgggtat ttttctatc gaaacggcta
   481 tgtcaacatc gtcttggaag agcgccaggg atggctcgac atgcccccg gagatccaac
   541 aaaggttgcg caaccgactg gtattgcata tctcgacgaa accttggtg ccatgttcgt
   601 cttttattgg ccagtcctcg acgggagctt tcccggcttg agcctcatgt tttgcaatta
   661 tctcggagcg ttgcccttgg gcttggtggt gatgacctg gagtccctaa ggaagggaaa
   721 cagaagttca ttgtgagtga ccgccctaca tataattccg aacacagctg tgctggtgct
   781 aaaacttccc tctcttactg tagttcattc ttttacagcc caacgtttg gggaatgatt
   841 gcagtcata tgacattggc cgtttcgata ccttgggtacc tcaccatata tctgttgatt
   901 tctaccaccg cgtctcacc caccattgag aacatgtcga ttccactggc cgaattgaaa
   961 gctctgattg tcaatatcgt cgttggtgact gtattgccta gtctattagt ggccctgcca
  1021 gagacaataa ctcagacgct gttcacgaga caaacagcga ttacgctgtg gcagctgtgg
  1081 ccattctgga gcaactgcag gcattttatt gcaaggaagt ttatatcggc tactgagcgc
  1141 ggtgccgact caagagctca atggacaagg gtcaggagtg cattccgttc cgtctatggt
  1201 ctgacatttg cagctgcagc catcgcacac attgcaacat ggtcaatctc ctaaccgcc
  1261 gcctatgctc tgccggagcg tatgagtgcc gaaaccgtct cttactcca tccgcaaacc
  1321 gtctttgtca atacttgcc ctggctgcct gtcacgactg actctgtggg tgaagggact
  1381 ctctggttgc tacaatggga taagtttgtt ggggttggtg ccatttactg gtggagcctc
  1441 gatctataca gagccgcaca tacggctcaa cgcaagaaaa tcaactggta ttattttgct
  1501 ctcaaaaacg tggcgttttg cttagtatct gggttcaccg gtgctacgat agagttgctt
  1561 tgggagaggg aagaaatgat tatggaggcc ggcgctgcta aagaaaagac aaaatga

```



```

gene          1..580
              /gene="aurE"
SOURCE       Calcarisporium arbuscula
CDS          join(1..136,218..347,436..580)
              /gene="aurE"
              /note="SnoaL-like protein"
              /codon_start=1
              /product="AurE"
              /translation="MSTSCSNPDDQVKARNDKFMAALNDATDIDLVMSFFSPDVSYSYD
              FAFEAVNMDFTSTRDYMDKMFHAVDDLHLTQVSLTGDKDFTASEWVMTYKLGSSDKVG
              EVVKMRGVSLSWYDAQGLIVRNDYSLKWSGDID"
BASE COUNT   151 a   138 c   119 g   172 t
ORIGIN
    1 atgtctactt cctggttcaa cccagacgac caagtcaagg ctgcaatga caaatcatg
    61 gcagcattga acgatgccac tgatattgat cttgtcatgt cctttttctc tccggatgta
   121 tcttacagtg actttggtat tctatcctct ctccctctt aatcccctaa tatttcttgc
   181 tcaacttctc tcatgctgta gactaacttt ctaccagcat ttgaagcagt gaatatggac
   241 ttacctcga cccgcgacta catggacaaa atgttccacg ccgtcgacga ttttcatctc
   301 acccaagtga gccttacagg agacaaggac ttcaccgctt cggaatggta cgtcttccct
   361 cattctcttc ttctctttcc cgcaatgcaa cgtctcattt ggcccatctt gagatgctga
   421 atcgcaatga ttagggtaa tgacatacaa actaaagagt agtgacaaag ttggagaggt
   481 ggtgaaaatg cgaggtgtga gtcttagctg gtacgacgcc cagggattga ttgtaaggaa
   541 caatgattat agtttgaat  ggtcaggaga cattgattag

```

```

gene          1..1940
              /gene="aurF"
SOURCE       Calcarisporium arbuscula
CDS          join(1..173,248..545,611..704,766..1663,1727..1940)
              /gene="aurF"
              /note="putative transcriptional factor"
              /codon_start=1
              /product="AurF"
              /translation="MCRFVDAIKSLLEDSDITTLVALANRLSPFRVDYRRVVVGDALS
VKPILVLEHEQPDCGAWRSAAHINLGLGAAQQQHHVPVTRAVHGAAVGGVQCDGLAS
PPVSNVMSDGTVDGDDDDLGYDQDTLYNQGTDYENEGGAVGQDGLPAPDAGLRFQECM
FSHRSASTPRAGGHGESYQCEVAQSSHAITCRELLERCILPNFEINHLENCESSTSGG
IHHCLPDEHSGMTGLARNTPSASPVENSITVELDGALEIATDVRTGKFNTLRAAKRHR
RNTSSLRLSSHADAGCVGDARSSAGVVKS PARRSTAVSDAALRKVKYAARTCIRADYFQ
FLEANLPRWVRDGIWGKEWSPNQNTANVDGYENLQKAYWHVCRQLDRQMRDDAIRSRMAM
VLLHLEYENTCLSWKCAHSGKKPVTKVGRGNISLIDNI IENTHPEWRTADPGERSE
LRAKFHDRKRYGKRWWMLVKPLGSSILMLCSSKFAGMIKNTTVTAAMINEIKLAIQRS
ETGLMSLLSLANPIAESLFLDQGYDGHNAEQVLKALRAARLEVPAGEGVA"
BASE COUNT   442 a   558 c   568 g   372 t
ORIGIN
1 atgtgtcgtt tcgtcgacgc catcaagtct ctctcgacg aaagtgcacat cacaaccctc
61 gttgccctcg ccaatcgctt gagcccgttt agagtcgact accgcccaggt cgtcgtgggc
121 gatgctctgt ccgtcaagcc catcctggtc ctcgagcatg agcagccgcc atggtgaggg
181 cccgtccccg gcaatcgctg tggttgcccc cctcggatta ctgacaggcg ggtctctccg
241 tgcgtagcga tggagcgtgg aggtcggctg cgcataaaa cctcggcctt ggagcagcac
301 agcagcaaca tcaccccgtc cccacgagag cctgcatgg cgcggccgtg ggccgctcc
361 agtgcgacgg cctggcgagc cctcccgttt cgaacaacgt aatgtctgat ggcacggctg
421 atggagatga cgacgacctc ggctacgacc aggatacgtc atataaccag ggcacagatt
481 acgagaatga aggaggcgct gttggacaag acggcctacc cgcgctgat gccggcttgt
541 tccaggtttg taccatgtct gatatttaca aaaccctcga gccaaagtaa ccaggatgcc
601 acctctctag gaatgcatgt ttagccacag atcagctagc acgcccgcg cgggcccga
661 cggagagtcc tattgccagg aagtcgcca atcgtcacat gccagtctgt atcttgcca
721 tcaactcctg ttaagcgagg cgagtcggct aacgtgagtc gacagtcact tgcagggagc
781 tgctggagcg ttgcatatta ccaaactttg agataaatca ccttgaaaac tgcgagagct
841 caacgagcgg cggcatccat cactgcctcc cggatgagca ttctgggatg acgggcttgg
901 cacgtaatac tccatctgcc agcccagtcg aaaactccat taccgtggag ctcgatggcg
961 ctctggaat tgccacagat gtcaggaccg gcaagtcaa cactctcgtg gcagcaaagc
1021 gccaccgtag aaacacttca tcgctgcgcc tcagttcgca cgacgctggg tgcgtcggcg
1081 atgcgcgctc ctcgccggc gtggtgaaga gtcccgccag gcgctcgacg gctgtctctg
1141 atgcggcggt gcgcaaggtg aagtatgcag cgcggacctg cattcgagcc gactatttcc
1201 agtttttggg ggcgaacctg ccacgctggg tcagagacgg catctggggt aaagagtgg
1261 ctccaaacca gaccgcaaac gtcgacgggt atgagaacct acaaaaggcg tattggcacg
1321 tgtgccggtt agataggcag atgagagacg atgcaatccg gagccgcatg gcaatggtcc
1381 tcctccattt ggagtatgaa aacacatgcc tctcgtgaa aacttgccc cacagcggga
1441 agaagcccgt gaccaaggtg ggcaggggga atatcagctc gttgatcgac aacatcatcg
1501 agaacacgca cccggagtgg cgcactgcc accctggaga gaggtctgag ctgctgacga
1561 aattccacga cagaaagcga tacggcaaga ggtggtggat gctagttaa ccccttgggt
1621 ctagcatcct gatgctatgt tcttcaaagt ttgcgggaat gatgatggc cgtaacgttg
1681 cactcttcac actccacagc gggaacagat gctaaaccac gtacagaaag aataccacg
1741 tcaccgctgc catgatcaat gaaatcaagc tggccattca acggtcggag acggggctga
1801 tgagcctgct gagcttgccc aacccattg cggagagcct atttctcgac caaggatacg
1861 acggccacaa cgccgaacaa gtgttgaagg cgctcagacg cgcgccctg gaggtggcgc
1921 caggggaggg ggttgcgtga

```

```

gene          1..1313
              /gene="aurG"
SOURCE        Calcarisporium arbuscula
CDS           join(1..788,869..1313)
              /gene="aurG"
              /note="O-acyl-transferase"
              /codon_start=1
              /product="AurG"
              /translation="MGLWLVLANQVGLVGLVVLVVCFTPANSLVRPLLLLPGITALVSY
GLILNKEAIANAGAWSLVNLTAGLFLQYLDVGLISRWTYSAYGPTSSRGGQPNASLD
LAGRKKPPSSSLLSRLQWGFSTATSWRAPSTVWEAKGTPHFEELPSRGRFLARNAMTL
LWSVLVLDVMGLVGGDLDPVANAAHFTWDRVRFARLGDVSRDEVILRATVVYMRWGA
MYFSLQVVYSFLAIVFVMVGLSPVQRWPPPLFGSFTEIYTLRNTWGKAHQQLIRQKVSS
PAHYTTYSLGLRKGGIAGRYTCILATFFVSGLLHLFCAEYSYGIQWDQSGTLRFYSI
QALGIAMEDAVQATSRRLFAYRSTYWTRAIGYVWVLLWFLWTSPAYFFPLLKYDTEKR
PPVLLGPIETWLQSRHVQ"
BASE COUNT   223 a   397 c   370 g   323 t
ORIGIN
    1 atgggcctct ggctggtgct ggccaatcaa gtcgggctgg tgggcacgct ggtcctcgtc
    61 gtttgcttca cgccggccaa ctccctcgtc cgcccgttc tgctgcccgg gataaccgcc
   121 ctcggtgctt acggcctcat cttgaacaag gaggccatcg caaacgccgg cgcattggtct
   181 ctggtcaacc tgaacactgc gggcctgttc ctccagtacc tagacgtcgg cctgatcagc
   241 cggtagacct attccgcgta tgggccaca tcatcccgcg gtggacagcc aaatgccagc
   301 ctcgacctgg ccggccgcaa gaagccaccg tcgtcaagcc tcctctcccg tctgcagtgg
   361 gggttctcca cggctacgtc ttggcgtgct ccatctacag tgtgggaggc caagggcacc
   421 ccacactttg aggaactgcc tagccgcgga cgcttcctcg cgaggaatgc catgaccttg
   481 ctctggtcag tgctcgctct tgacgtcatg ggattggtgg gcggcgacct cgaccccgtg
   541 gcaaacgctg cccatttcac atgggacagg gttcgcttct tggcacgctt gggtgacgtc
   601 tcaagggagc aggtcatctt gagggccact gtcgtataca tgcgctgggg tgccatgtac
   661 tttccctcc aagtggctca cagcttctg gcgattgtct tcgttatggt gggcctttcg
   721 ccggttcaga ggtggccgcc gctcttcggc tcgtttacgg agatataac tcttcggaac
   781 acatgggggt aggtttcgtc cgtctcctct tggcccatc ctttcatcta gggttctcgg
   841 cgttactgac gtggtaaatt gtaaacagca aagcctggca ccaagtgtac cgtcagaaaag
   901 tcagtagccc ggcgcattac acaacgtact cattgctcgg gctcaggaag ggggggatcg
   961 cgggcagata cacgtgtatc ctgccacct tttttgtctc ggggctgctt catctgttct
  1021 gtgcagagta ttcctacggt attcagtggg atcagtcagg cacgcttcgc ttctacagca
  1081 tccaggccct ggggatcgcg atggaagatg ccgtgcaggc cacttcccgt cggctcttcg
  1141 cgtataggtc cacctattgg acaagggcga ttggctacgt atgggtctta ctgtggtttc
  1201 tctggacatc tccggcgtat ttctttccc tgctcaagta cgatactgag aaaagacccc
  1261 ccgtgcttct aggtccaatt gagacatggc ttcagatgct ccatgtccaa tga

```

## Supplementary Computation Data

Cartesian coordinates, energies, free energies (1 atm, 298 K) and number of imaginary frequencies of all stationary points and values of imaginary frequencies of all transition structures.

### Acid-catalyzed 5-*exo*-tet TS

|                                             |             |
|---------------------------------------------|-------------|
| M06-2X/6-31G(d)-IEFPCM(water) Energy =      | -730.918173 |
| M06-2X/6-31G(d)-IEFPCM(water) Free Energy = | -730.663185 |
| M06-2X/6-311++G(d,p)-IEFPCM(water) Energy = | -731.148140 |
| Number of Imaginary Frequencies =           | 1 (-437.56) |

### M06-2X/6-31G(d)-IEFPCM(water) Geometry

|   |           |           |           |
|---|-----------|-----------|-----------|
| O | -0.509872 | 0.439603  | 1.320640  |
| C | -0.438501 | 1.164373  | 0.105885  |
| C | -1.601577 | 0.581550  | -0.755361 |
| C | -1.353772 | -0.892398 | -0.428661 |
| C | -1.178241 | -0.825025 | 1.093262  |
| C | -0.578125 | 2.655061  | 0.366153  |
| O | -2.849272 | 0.966752  | -0.260967 |
| C | -2.383899 | -1.878645 | -0.924167 |
| O | -0.043169 | -1.148208 | -0.964988 |
| C | -0.388543 | -1.956845 | 1.715591  |
| H | -2.173892 | -0.757240 | 1.545950  |
| H | -1.486720 | 0.797255  | -1.823762 |
| H | -1.590255 | 2.836159  | 0.732115  |
| H | 0.124214  | 2.984080  | 1.134975  |
| H | -0.405474 | 3.231992  | -0.545599 |
| H | -3.162461 | 1.743099  | -0.747779 |
| H | -3.366123 | -1.605126 | -0.533040 |
| H | -2.434137 | -1.863950 | -2.017439 |
| H | -2.135054 | -2.891328 | -0.596434 |
| H | -0.113748 | -1.365447 | -1.911233 |
| H | 0.575650  | -2.086528 | 1.218097  |
| H | -0.220366 | -1.747774 | 2.774730  |
| C | 2.042402  | 0.326589  | 0.080917  |
| C | 0.841274  | 0.799729  | -0.607538 |
| H | 0.956468  | 1.063013  | -1.655836 |
| H | -0.949067 | -2.892952 | 1.637794  |

|   |          |           |           |
|---|----------|-----------|-----------|
| H | 1.863089 | -0.021870 | 1.097519  |
| C | 3.064222 | -0.446653 | -0.664195 |
| C | 3.669045 | -1.498377 | -0.120518 |
| H | 3.278358 | -0.123001 | -1.680301 |
| H | 3.450964 | -1.816189 | 0.895874  |
| O | 2.290684 | 1.774437  | 0.038047  |
| H | 2.115296 | 2.156181  | 0.918322  |
| H | 4.400582 | -2.077213 | -0.674008 |

**Base-catalyzed 5-*exo*-tet TS**

|                                             |             |
|---------------------------------------------|-------------|
| M06-2X/6-31G(d)-IEFPCM(water) Energy =      | -806.388506 |
| M06-2X/6-31G(d)-IEFPCM(water) Free Energy = | -806.137205 |
| M06-2X/6-311++G(d,p)-IEFPCM(water) Energy = | -806.674425 |
| Number of Imaginary Frequencies =           | 1 (-598.97) |

M06-2X/6-31G(d)-IEFPCM(water) Geometry

|   |           |           |           |
|---|-----------|-----------|-----------|
| O | 0.962457  | -0.623191 | 1.286603  |
| C | 0.962336  | -1.170253 | -0.045265 |
| C | 1.893884  | -0.183268 | -0.770587 |
| C | 1.133942  | 1.080553  | -0.340257 |
| C | 1.062912  | 0.819224  | 1.187897  |
| C | 1.473143  | -2.593591 | 0.013826  |
| O | 3.232465  | -0.281668 | -0.322390 |
| C | 1.792548  | 2.401369  | -0.700899 |
| O | -0.108594 | 0.911782  | -0.921665 |
| C | -0.092733 | 1.497527  | 1.893752  |
| H | 2.007680  | 1.113213  | 1.672499  |
| H | 1.897684  | -0.298941 | -1.858126 |
| H | 2.507971  | -2.607279 | 0.367059  |
| H | 0.837058  | -3.181702 | 0.673913  |
| H | 1.434294  | -3.041518 | -0.983369 |
| H | 3.192364  | -0.432682 | 0.636177  |
| H | 2.822274  | 2.449372  | -0.331836 |
| H | 1.801738  | 2.518756  | -1.789179 |
| H | 1.228064  | 3.239121  | -0.274936 |
| H | -1.318123 | 2.051855  | -0.722076 |
| H | -1.017829 | 1.360043  | 1.329424  |
| H | -0.211709 | 1.094642  | 2.904287  |
| C | -1.632875 | -1.204225 | 0.133225  |
| C | -0.423850 | -1.018237 | -0.662090 |

|   |           |           |           |
|---|-----------|-----------|-----------|
| H | -0.534996 | -1.151221 | -1.730081 |
| H | 0.100379  | 2.573082  | 1.976970  |
| H | -1.530693 | -0.926471 | 1.194539  |
| C | -2.926065 | -0.688983 | -0.421343 |
| C | -3.870476 | -0.099503 | 0.312713  |
| H | -3.085863 | -0.863696 | -1.486736 |
| H | -3.726380 | 0.063825  | 1.379519  |
| O | -1.335110 | -2.529064 | -0.173851 |
| O | -2.129349 | 2.622767  | -0.622936 |
| H | -2.801827 | 1.956351  | -0.418639 |
| H | -4.813633 | 0.234570  | -0.111328 |

**Base-catalyzed 5-endo-tet TS**

|                                             |             |
|---------------------------------------------|-------------|
| M06-2X/6-31G(d)-IEFPCM(water) Energy =      | -806.344667 |
| M06-2X/6-31G(d)-IEFPCM(water) Free Energy = | -806.094020 |
| M06-2X/6-311++G(d,p)-IEFPCM(water) Energy = | -806.637885 |
| Number of Imaginary Frequencies =           | 1 (-572.66) |

**M06-2X/6-31G(d)-IEFPCM(water) Geometry**

|   |           |           |           |
|---|-----------|-----------|-----------|
| O | -1.478213 | -1.379119 | 0.676877  |
| C | -0.245750 | -0.665945 | 0.743716  |
| C | -0.344707 | 0.247085  | -0.478092 |
| C | -1.791081 | 0.764043  | -0.440837 |
| C | -2.483472 | -0.390873 | 0.365147  |
| C | -0.109706 | 0.053788  | 2.085587  |
| O | 0.748450  | 1.059326  | -0.612306 |
| C | -1.953948 | 2.142403  | 0.185242  |
| O | -2.354124 | 0.809145  | -1.756510 |
| C | -3.623790 | -1.082786 | -0.352235 |
| H | -2.857710 | 0.029705  | 1.310990  |
| H | -0.401520 | -0.484026 | -1.318815 |
| H | -0.997727 | 0.631624  | 2.351005  |
| H | 0.050829  | -0.688383 | 2.876093  |
| H | 0.752652  | 0.727411  | 2.066189  |
| H | 1.615789  | 1.895930  | 0.549169  |
| H | -1.541946 | 2.196510  | 1.194919  |
| H | -1.423060 | 2.878988  | -0.427251 |
| H | -3.013756 | 2.416387  | 0.221350  |
| H | -1.741398 | 1.340148  | -2.288796 |
| H | -3.276225 | -1.503617 | -1.297958 |

|   |           |           |           |
|---|-----------|-----------|-----------|
| H | -4.020915 | -1.886383 | 0.274636  |
| C | 1.881827  | -0.705525 | -0.504983 |
| C | 1.085446  | -1.434854 | 0.513011  |
| H | 1.627621  | -1.466297 | 1.481551  |
| H | -4.428291 | -0.373176 | -0.564624 |
| H | 1.522985  | -0.785899 | -1.518587 |
| C | 3.311381  | -0.460188 | -0.314663 |
| C | 4.068384  | 0.099917  | -1.263626 |
| H | 3.730071  | -0.690652 | 0.663578  |
| H | 3.653311  | 0.344071  | -2.238525 |
| O | 1.238052  | -2.577589 | -0.216433 |
| H | 5.111904  | 0.345192  | -1.092747 |
| O | 2.314631  | 2.312094  | 1.123659  |
| H | 3.119521  | 1.879227  | 0.805929  |

**5-endo-tet product**

|                                             |             |
|---------------------------------------------|-------------|
| M06-2X/6-31G(d)-IEFPCM(water) Energy =      | -730.528795 |
| M06-2X/6-31G(d)-IEFPCM(water) Free Energy = | -730.282782 |
| M06-2X/6-311++G(d,p)-IEFPCM(water) Energy = | -730.761069 |
| Number of Imaginary Frequencies =           | 0           |

M06-2X/6-31G(d)-IEFPCM(water) Geometry

|   |           |           |           |
|---|-----------|-----------|-----------|
| O | 1.123653  | 1.318627  | 0.764290  |
| C | -0.120250 | 0.654364  | 0.629879  |
| C | 0.157316  | -0.235486 | -0.564323 |
| C | 1.479109  | -0.906009 | -0.266430 |
| C | 2.116766  | 0.261201  | 0.620239  |
| C | -0.547657 | -0.017859 | 1.930358  |
| O | -1.074671 | -0.865621 | -0.824399 |
| C | 1.410134  | -2.250003 | 0.444514  |
| O | 2.156473  | -1.065971 | -1.505674 |
| C | 3.370544  | 0.871259  | 0.038351  |
| H | 2.323935  | -0.138661 | 1.621700  |
| H | 0.389222  | 0.451390  | -1.393539 |
| H | 0.288053  | -0.512919 | 2.427846  |
| H | -0.933573 | 0.744965  | 2.613540  |
| H | -1.339152 | -0.750907 | 1.752724  |
| H | 0.974301  | -2.989799 | -0.232136 |
| H | 2.419239  | -2.580379 | 0.717744  |
| H | 0.809208  | -2.217396 | 1.354039  |

|   |           |           |           |
|---|-----------|-----------|-----------|
| H | 2.979495  | -1.551660 | -1.341572 |
| H | 3.177907  | 1.249372  | -0.968047 |
| H | 3.709996  | 1.692415  | 0.675039  |
| C | -2.007189 | 0.238616  | -0.755283 |
| C | -1.305149 | 1.417808  | 0.033139  |
| H | -1.977582 | 1.850019  | 0.784694  |
| H | 4.171272  | 0.127474  | -0.014724 |
| H | -2.171136 | 0.625292  | -1.771855 |
| C | -3.312032 | -0.209097 | -0.170799 |
| C | -3.566923 | -1.441242 | 0.258518  |
| H | -4.079844 | 0.562414  | -0.130703 |
| H | -2.808105 | -2.216387 | 0.213033  |
| O | -0.881880 | 2.403022  | -0.884622 |
| H | -4.538595 | -1.707345 | 0.661473  |
| H | -0.031263 | 2.740332  | -0.554987 |

**5-*exo*-tet product**

|                                             |             |
|---------------------------------------------|-------------|
| M06-2X/6-31G(d)-IEFPCM(water) Energy =      | -730.552673 |
| M06-2X/6-31G(d)-IEFPCM(water) Free Energy = | -730.307905 |
| M06-2X/6-311++G(d,p)-IEFPCM(water) Energy = | -730.784526 |
| Number of Imaginary Frequencies =           | 0           |

M06-2X/6-31G(d)-IEFPCM(water) Geometry

|   |           |           |           |
|---|-----------|-----------|-----------|
| O | -0.763764 | 0.593517  | 1.300589  |
| C | -0.438392 | 1.152018  | 0.016838  |
| C | -1.594201 | 0.670130  | -0.866788 |
| C | -1.361675 | -0.794798 | -0.459250 |
| C | -1.449292 | -0.656434 | 1.068015  |
| C | -0.210836 | 2.634807  | 0.143449  |
| O | -2.813511 | 1.227217  | -0.451951 |
| C | -2.196152 | -1.874583 | -1.094032 |
| O | 0.022229  | -0.970869 | -0.807575 |
| C | -0.815911 | -1.781939 | 1.859517  |
| H | -2.499841 | -0.530689 | 1.360308  |
| H | -1.400843 | 0.829814  | -1.935259 |
| H | -1.140923 | 3.116808  | 0.455538  |
| H | 0.570454  | 2.835199  | 0.879069  |
| H | 0.103225  | 3.052939  | -0.817284 |
| H | -3.503266 | 0.934606  | -1.065663 |
| H | -3.253810 | -1.717737 | -0.861337 |



|   |           |           |           |
|---|-----------|-----------|-----------|
| H | -2.065526 | -1.861316 | -2.179479 |
| H | -1.903867 | -2.860613 | -0.720502 |
| H | -0.738074 | -1.500272 | 2.913221  |
| H | 0.182689  | -2.012817 | 1.479113  |
| C | 1.908594  | 0.091045  | 0.316230  |
| C | 0.686182  | 0.288170  | -0.577541 |
| H | 1.038777  | 0.698911  | -1.534755 |
| H | -1.432800 | -2.683741 | 1.794221  |
| H | 1.549590  | -0.143026 | 1.328701  |
| C | 2.761948  | -1.045499 | -0.184648 |
| C | 3.979138  | -0.888552 | -0.696222 |
| H | 2.313956  | -2.034029 | -0.106809 |
| H | 4.428842  | 0.095884  | -0.789365 |
| O | 2.586269  | 1.334579  | 0.303438  |
| H | 3.322416  | 1.274605  | 0.930986  |
| H | 4.562801  | -1.736256 | -1.040135 |

#### Acid-catalyzed 6-*endo*-tet TS

|                                             |             |
|---------------------------------------------|-------------|
| M06-2X/6-31G(d)-IEFPCM(water) Energy =      | -730.930163 |
| M06-2X/6-31G(d)-IEFPCM(water) Free Energy = | -730.674640 |
| M06-2X/6-311++G(d,p)-IEFPCM(water) Energy = | -731.161283 |
| Number of Imaginary Frequencies =           | 1 (-250.22) |

#### M06-2X/6-31G(d)-IEFPCM(water) Geometry

|   |           |           |           |
|---|-----------|-----------|-----------|
| O | -0.476090 | 0.540809  | 1.276692  |
| C | -0.365397 | 1.238854  | 0.033434  |
| C | -1.210634 | 0.448173  | -0.989543 |
| C | -1.226768 | -0.964263 | -0.377314 |
| C | -1.303792 | -0.628019 | 1.120324  |
| C | -0.804793 | 2.685535  | 0.206718  |
| O | -2.498438 | 1.012806  | -1.030087 |
| C | -2.351292 | -1.853689 | -0.872496 |
| O | 0.045642  | -1.506519 | -0.729096 |
| C | -0.835409 | -1.705594 | 2.073078  |
| H | -2.339697 | -0.344372 | 1.347712  |
| H | -0.742330 | 0.431459  | -1.982058 |
| H | -0.758097 | 3.214990  | -0.748689 |
| H | -1.831373 | 2.707762  | 0.571010  |
| H | -0.158594 | 3.195497  | 0.926118  |
| H | -2.967790 | 0.639848  | -1.791274 |

|   |           |           |           |
|---|-----------|-----------|-----------|
| H | -3.325218 | -1.416364 | -0.641660 |
| H | -2.266370 | -1.997235 | -1.953568 |
| H | -2.299377 | -2.836776 | -0.392653 |
| H | 0.102035  | -2.425166 | -0.419308 |
| H | 0.186952  | -2.023247 | 1.846175  |
| H | -0.857288 | -1.333853 | 3.099887  |
| C | 1.901125  | -0.009634 | -0.070601 |
| C | 1.114579  | 1.197646  | -0.335843 |
| H | 1.352128  | 1.713238  | -1.265841 |
| H | -1.494263 | -2.576832 | 2.013200  |
| H | 1.621225  | -0.569106 | 0.814067  |
| C | 3.066805  | -0.378582 | -0.806030 |
| C | 3.767275  | -1.457437 | -0.412624 |
| H | 3.333116  | 0.187504  | -1.692372 |
| H | 3.488972  | -2.021189 | 0.473541  |
| O | 1.967372  | 1.734902  | 0.707109  |
| H | 1.512409  | 1.567883  | 1.560597  |
| H | 4.625477  | -1.807970 | -0.976447 |

**Base-catalyzed 6-endo-tet TS**

|                                             |             |
|---------------------------------------------|-------------|
| M06-2X/6-31G(d)-IEFPCM(water) Energy =      | -806.385620 |
| M06-2X/6-31G(d)-IEFPCM(water) Free Energy = | -806.133997 |
| M06-2X/6-311++G(d,p)-IEFPCM(water) Energy = | -806.672276 |
| Number of Imaginary Frequencies =           | 1 (-625.71) |

**M06-2X/6-31G(d)-IEFPCM(water) Geometry**

|   |           |           |           |
|---|-----------|-----------|-----------|
| O | 1.050110  | -0.535351 | 1.325338  |
| C | 0.896719  | -1.320305 | 0.125916  |
| C | 1.362989  | -0.395905 | -1.004397 |
| C | 0.852601  | 0.978554  | -0.494028 |
| C | 1.297270  | 0.837973  | 0.982844  |
| C | 1.673179  | -2.612539 | 0.288327  |
| O | 2.778883  | -0.470135 | -1.107386 |
| C | 1.527809  | 2.164547  | -1.183583 |
| O | -0.521572 | 1.058937  | -0.668181 |
| C | 0.605637  | 1.765300  | 1.959904  |
| H | 2.384335  | 1.005642  | 1.034839  |
| H | 0.888668  | -0.646140 | -1.963348 |
| H | 2.722237  | -2.411000 | 0.512763  |
| H | 1.229402  | -3.190613 | 1.104560  |

|   |           |           |           |
|---|-----------|-----------|-----------|
| H | 1.617906  | -3.209265 | -0.628402 |
| H | 3.047069  | 0.138481  | -1.811132 |
| H | 2.616117  | 2.170044  | -1.058627 |
| H | 1.291066  | 2.154402  | -2.253290 |
| H | 1.133413  | 3.097458  | -0.766073 |
| H | -1.376116 | 2.353134  | -0.199273 |
| H | -0.478665 | 1.726489  | 1.838800  |
| H | 0.862067  | 1.504874  | 2.991129  |
| C | -1.452957 | -0.487885 | 0.220668  |
| C | -0.593561 | -1.600759 | -0.113621 |
| H | -0.729781 | -2.000475 | -1.135917 |
| H | 0.924012  | 2.797793  | 1.779549  |
| H | -1.243426 | -0.028535 | 1.173634  |
| C | -2.764881 | -0.263596 | -0.423661 |
| C | -3.585932 | -1.229644 | -0.828395 |
| H | -3.015686 | 0.787294  | -0.556674 |
| H | -3.333468 | -2.270618 | -0.649657 |
| O | -1.354260 | -2.221669 | 0.855847  |
| O | -2.021475 | 3.074891  | 0.071790  |
| H | -2.380587 | 2.757174  | 0.911269  |
| H | -4.525273 | -1.003974 | -1.323257 |

**6-endo-tet product**

|                                             |             |
|---------------------------------------------|-------------|
| M06-2X/6-31G(d)-IEFPCM(water) Energy =      | -730.561084 |
| M06-2X/6-31G(d)-IEFPCM(water) Free Energy = | -730.314996 |
| M06-2X/6-311++G(d,p)-IEFPCM(water) Energy = | -730.792331 |
| Number of Imaginary Frequencies =           | 0           |

M06-2X/6-31G(d)-IEFPCM(water) Geometry

|   |           |           |           |
|---|-----------|-----------|-----------|
| O | -1.093413 | 0.667446  | 1.116339  |
| C | -0.731882 | 1.154176  | -0.198660 |
| C | -1.054207 | -0.012200 | -1.137000 |
| C | -0.565361 | -1.175181 | -0.255090 |
| C | -1.193331 | -0.770809 | 1.087883  |
| C | -1.481578 | 2.440789  | -0.476125 |
| O | -2.418581 | -0.106311 | -1.482299 |
| C | -0.951970 | -2.555147 | -0.738438 |
| O | 0.861668  | -1.135607 | -0.231066 |
| C | -0.607551 | -1.405801 | 2.333225  |
| H | -2.261829 | -1.033341 | 1.047181  |

|   |           |           |           |
|---|-----------|-----------|-----------|
| H | -0.492900 | 0.032615  | -2.074708 |
| H | -2.560222 | 2.273933  | -0.444807 |
| H | -1.219386 | 3.195521  | 0.268306  |
| H | -1.215283 | 2.820899  | -1.466902 |
| H | -2.953903 | 0.044964  | -0.687501 |
| H | -0.466241 | -2.756274 | -1.697327 |
| H | -0.629667 | -3.315131 | -0.020607 |
| H | -2.033664 | -2.621740 | -0.870827 |
| H | 0.479871  | -1.325561 | 2.372181  |
| H | -1.030181 | -0.933491 | 3.223747  |
| C | 1.481682  | 0.045558  | 0.250233  |
| C | 0.787775  | 1.352916  | -0.195535 |
| H | 1.121563  | 1.647726  | -1.196172 |
| H | -0.871930 | -2.467100 | 2.356165  |
| H | 1.435803  | 0.066499  | 1.349816  |
| C | 2.925585  | 0.048290  | -0.157911 |
| C | 3.515473  | -0.901265 | -0.876246 |
| H | 3.477770  | 0.924768  | 0.177223  |
| H | 2.965128  | -1.774834 | -1.210030 |
| O | 1.175516  | 2.390242  | 0.681166  |
| H | 0.741896  | 2.197274  | 1.530795  |
| H | 4.563833  | -0.830841 | -1.147667 |

**$\beta$ -keto ester conformer 1**

|                                             |              |
|---------------------------------------------|--------------|
| M06-2X/6-31G(d)-IEFPCM(water) Energy =      | -1079.128235 |
| M06-2X/6-31G(d)-IEFPCM(water) Free Energy = | -1078.760482 |
| M06-2X/6-311++G(d,p)-IEFPCM(water) Energy = | -1079.431647 |
| Number of Imaginary Frequencies =           | 0            |

M06-2X/6-31G(d)-IEFPCM(water) Geometry

|   |          |           |           |
|---|----------|-----------|-----------|
| C | 8.236914 | -0.256017 | 0.140567  |
| C | 8.148151 | 1.214095  | 0.499263  |
| C | 6.833605 | 1.886823  | 0.227872  |
| O | 5.732348 | 1.089708  | 0.140855  |
| C | 5.805742 | -0.285013 | 0.056885  |
| C | 6.972966 | -0.980200 | 0.026167  |
| C | 4.495216 | -0.890926 | -0.025072 |
| C | 3.340373 | -0.187193 | -0.041768 |
| C | 2.037456 | -0.797141 | -0.111558 |
| C | 0.895670 | -0.070968 | -0.139034 |

|   |            |           |           |
|---|------------|-----------|-----------|
| C | -0.426852  | -0.640474 | -0.203548 |
| C | -1.551119  | 0.110152  | -0.240409 |
| C | -2.888242  | -0.433709 | -0.299427 |
| C | -3.990901  | 0.345073  | -0.338710 |
| C | -5.372324  | -0.124837 | -0.383602 |
| C | -6.353516  | 0.807560  | -0.357202 |
| C | -7.812330  | 0.609390  | -0.346652 |
| C | -8.389753  | -0.326853 | 0.426404  |
| C | -9.860565  | -0.607129 | 0.563646  |
| C | -10.455717 | 0.088855  | 1.794773  |
| C | -8.582515  | 1.581277  | -1.209461 |
| C | -5.608825  | -1.609374 | -0.481857 |
| C | 7.018175   | -2.475428 | -0.138959 |
| O | 6.680265   | 3.072583  | 0.131311  |
| O | 9.330569   | -0.783660 | 0.017184  |
| H | 8.062066   | -2.790522 | -0.170622 |
| H | 6.529459   | -2.990240 | 0.694086  |
| H | 6.534150   | -2.797981 | -1.065632 |
| H | 8.945421   | 1.778180  | 0.012277  |
| H | 8.320279   | 1.290813  | 1.582283  |
| H | 4.468587   | -1.975121 | -0.070853 |
| H | 3.378370   | 0.899501  | -0.000329 |
| H | 1.985832   | -1.884943 | -0.142675 |
| H | 0.964437   | 1.017204  | -0.110156 |
| H | -0.506464  | -1.727295 | -0.222500 |
| H | -1.459114  | 1.196972  | -0.223822 |
| H | -2.978324  | -1.518747 | -0.302914 |
| H | -3.855381  | 1.427133  | -0.318449 |
| H | -6.036284  | 1.852496  | -0.373602 |
| H | -6.638733  | -1.829294 | -0.765737 |
| H | -4.938666  | -2.049577 | -1.227429 |
| H | -5.405341  | -2.111221 | 0.471502  |
| H | -8.374310  | 1.411142  | -2.271824 |
| H | -9.661046  | 1.518789  | -1.055819 |
| H | -8.269796  | 2.607866  | -0.986149 |
| H | -7.741250  | -0.915269 | 1.075460  |
| H | -10.005068 | -1.689575 | 0.660230  |
| H | -10.406513 | -0.299904 | -0.333085 |
| H | -11.511909 | -0.166800 | 1.920696  |
| H | -9.922423  | -0.206345 | 2.703997  |

|   |            |          |          |
|---|------------|----------|----------|
| H | -10.373088 | 1.175928 | 1.696342 |
|---|------------|----------|----------|

**$\beta$ -keto ester conformer 2**

|                                        |              |
|----------------------------------------|--------------|
| M06-2X/6-31G(d)-IEFPCM(water) Energy = | -1079.127541 |
|----------------------------------------|--------------|

|                                             |              |
|---------------------------------------------|--------------|
| M06-2X/6-31G(d)-IEFPCM(water) Free Energy = | -1078.758822 |
|---------------------------------------------|--------------|

|                                             |              |
|---------------------------------------------|--------------|
| M06-2X/6-311++G(d,p)-IEFPCM(water) Energy = | -1079.431114 |
|---------------------------------------------|--------------|

|                                   |   |
|-----------------------------------|---|
| Number of Imaginary Frequencies = | 0 |
|-----------------------------------|---|

M06-2X/6-31G(d)-IEFPCM(water) Geometry

|   |           |           |          |
|---|-----------|-----------|----------|
| C | -8.252711 | -0.027328 | 0.143009 |
|---|-----------|-----------|----------|

|   |           |          |           |
|---|-----------|----------|-----------|
| C | -8.114682 | 1.431544 | -0.244090 |
|---|-----------|----------|-----------|

|   |           |          |           |
|---|-----------|----------|-----------|
| C | -6.750584 | 2.036772 | -0.078776 |
|---|-----------|----------|-----------|

|   |           |          |           |
|---|-----------|----------|-----------|
| O | -5.688529 | 1.183432 | -0.074173 |
|---|-----------|----------|-----------|

|   |           |           |          |
|---|-----------|-----------|----------|
| C | -5.826924 | -0.183985 | 0.040746 |
|---|-----------|-----------|----------|

|   |           |           |          |
|---|-----------|-----------|----------|
| C | -7.022995 | -0.815314 | 0.175872 |
|---|-----------|-----------|----------|

|   |           |           |          |
|---|-----------|-----------|----------|
| C | -4.548435 | -0.859035 | 0.033397 |
|---|-----------|-----------|----------|

|   |           |           |           |
|---|-----------|-----------|-----------|
| C | -3.358746 | -0.221509 | -0.056569 |
|---|-----------|-----------|-----------|

|   |           |           |           |
|---|-----------|-----------|-----------|
| C | -2.091034 | -0.904162 | -0.065853 |
|---|-----------|-----------|-----------|

|   |           |           |           |
|---|-----------|-----------|-----------|
| C | -0.909798 | -0.247284 | -0.144187 |
|---|-----------|-----------|-----------|

|   |          |           |           |
|---|----------|-----------|-----------|
| C | 0.377992 | -0.893352 | -0.148384 |
|---|----------|-----------|-----------|

|   |          |           |           |
|---|----------|-----------|-----------|
| C | 1.545273 | -0.212269 | -0.213516 |
|---|----------|-----------|-----------|

|   |          |           |           |
|---|----------|-----------|-----------|
| C | 2.848431 | -0.833835 | -0.210771 |
|---|----------|-----------|-----------|

|   |          |           |           |
|---|----------|-----------|-----------|
| C | 3.995892 | -0.120565 | -0.254779 |
|---|----------|-----------|-----------|

|   |          |           |           |
|---|----------|-----------|-----------|
| C | 5.350352 | -0.664725 | -0.230493 |
|---|----------|-----------|-----------|

|   |          |          |           |
|---|----------|----------|-----------|
| C | 6.366121 | 0.234104 | -0.204537 |
|---|----------|----------|-----------|

|   |          |          |           |
|---|----------|----------|-----------|
| C | 7.821421 | 0.077615 | -0.102207 |
|---|----------|----------|-----------|

|   |          |          |           |
|---|----------|----------|-----------|
| C | 8.569128 | 1.175841 | -0.336045 |
|---|----------|----------|-----------|

|   |           |          |           |
|---|-----------|----------|-----------|
| C | 10.065309 | 1.284472 | -0.267889 |
|---|-----------|----------|-----------|

|   |           |          |          |
|---|-----------|----------|----------|
| C | 10.527834 | 1.845649 | 1.084609 |
|---|-----------|----------|----------|

|   |          |           |          |
|---|----------|-----------|----------|
| C | 8.450101 | -1.233362 | 0.309964 |
|---|----------|-----------|----------|

|   |          |           |           |
|---|----------|-----------|-----------|
| C | 5.474056 | -2.167564 | -0.244979 |
|---|----------|-----------|-----------|

|   |           |           |          |
|---|-----------|-----------|----------|
| C | -7.132094 | -2.303305 | 0.372584 |
|---|-----------|-----------|----------|

|   |           |          |           |
|---|-----------|----------|-----------|
| O | -6.529678 | 3.213243 | -0.002325 |
|---|-----------|----------|-----------|

|   |           |           |          |
|---|-----------|-----------|----------|
| O | -9.360449 | -0.495483 | 0.352388 |
|---|-----------|-----------|----------|

|   |           |           |          |
|---|-----------|-----------|----------|
| H | -8.180643 | -2.556900 | 0.534525 |
|---|-----------|-----------|----------|

|   |           |           |           |
|---|-----------|-----------|-----------|
| H | -6.777845 | -2.854955 | -0.504103 |
|---|-----------|-----------|-----------|

|   |           |           |          |
|---|-----------|-----------|----------|
| H | -6.558221 | -2.642522 | 1.239903 |
|---|-----------|-----------|----------|

|   |           |          |          |
|---|-----------|----------|----------|
| H | -8.844087 | 2.043101 | 0.289582 |
|---|-----------|----------|----------|

|   |           |          |           |
|---|-----------|----------|-----------|
| H | -8.360083 | 1.503807 | -1.313329 |
|---|-----------|----------|-----------|

|   |           |           |          |
|---|-----------|-----------|----------|
| H | -4.576929 | -1.941850 | 0.103467 |
|---|-----------|-----------|----------|

|   |           |           |           |
|---|-----------|-----------|-----------|
| H | -3.339578 | 0.864475  | -0.123862 |
| H | -2.099370 | -1.991815 | -0.002743 |
| H | -0.917207 | 0.841720  | -0.205304 |
| H | 0.394860  | -1.981670 | -0.091546 |
| H | 1.516180  | 0.876885  | -0.268052 |
| H | 2.873687  | -1.920990 | -0.159698 |
| H | 3.917355  | 0.966687  | -0.291580 |
| H | 6.060416  | 1.279512  | -0.264367 |
| H | 6.486623  | -2.509094 | -0.440924 |
| H | 5.140040  | -2.600328 | 0.705666  |
| H | 4.829695  | -2.581421 | -1.027718 |
| H | 8.531616  | -1.935570 | -0.526983 |
| H | 9.454664  | -1.077062 | 0.707613  |
| H | 7.857934  | -1.716502 | 1.091817  |
| H | 8.045904  | 2.103592  | -0.571008 |
| H | 10.407037 | 1.952435  | -1.066718 |
| H | 10.540706 | 0.315757  | -0.447676 |
| H | 11.614457 | 1.969252  | 1.107402  |
| H | 10.068958 | 2.820401  | 1.277204  |
| H | 10.239626 | 1.173095  | 1.898658  |

### Enol conformer 1

|                                             |              |
|---------------------------------------------|--------------|
| M06-2X/6-31G(d)-IEFPCM(water) Energy =      | -1079.127453 |
| M06-2X/6-31G(d)-IEFPCM(water) Free Energy = | -1078.757563 |
| M06-2X/6-311++G(d,p)-IEFPCM(water) Energy = | -1079.435479 |
| Number of Imaginary Frequencies =           | 0            |

### M06-2X/6-31G(d)-IEFPCM(water) Geometry

|   |           |           |           |
|---|-----------|-----------|-----------|
| C | 8.172823  | -0.124276 | 0.119986  |
| C | 8.111470  | 1.235803  | 0.219011  |
| C | 6.842640  | 1.896854  | 0.236744  |
| O | 5.735037  | 1.073477  | 0.145215  |
| C | 5.794767  | -0.281115 | 0.047557  |
| C | 6.989100  | -0.939731 | 0.032115  |
| C | 4.479913  | -0.891379 | -0.033754 |
| C | 3.329510  | -0.184726 | -0.030712 |
| C | 2.021731  | -0.788704 | -0.113098 |
| C | 0.881308  | -0.062107 | -0.119994 |
| C | -0.443104 | -0.628655 | -0.201304 |
| C | -1.567774 | 0.120998  | -0.216479 |

|   |            |           |           |
|---|------------|-----------|-----------|
| C | -2.905116  | -0.421761 | -0.296104 |
| C | -4.009004  | 0.355521  | -0.312453 |
| C | -5.389948  | -0.114483 | -0.379002 |
| C | -6.373378  | 0.814082  | -0.324262 |
| C | -7.831903  | 0.613061  | -0.329011 |
| C | -8.413411  | -0.351866 | 0.404648  |
| C | -9.885291  | -0.637918 | 0.518203  |
| C | -10.495134 | 0.021261  | 1.762336  |
| C | -8.599342  | 1.614169  | -1.160533 |
| C | -5.623410  | -1.594971 | -0.531158 |
| C | 7.158889   | -2.428985 | -0.070837 |
| O | 6.630605   | 3.089247  | 0.321474  |
| O | 9.324752   | -0.810904 | 0.096170  |
| H | 7.720355   | -2.806456 | 0.789174  |
| H | 6.206313   | -2.954549 | -0.113017 |
| H | 7.731535   | -2.686700 | -0.966989 |
| H | 4.440330   | -1.972832 | -0.102247 |
| H | 3.371489   | 0.900596  | 0.035663  |
| H | 1.967665   | -1.875506 | -0.173194 |
| H | 0.950458   | 1.024888  | -0.061381 |
| H | -0.522422  | -1.714638 | -0.253605 |
| H | -1.477185  | 1.206938  | -0.165798 |
| H | -2.993681  | -1.506325 | -0.336764 |
| H | -3.875701  | 1.436577  | -0.254651 |
| H | -6.058275  | 1.859572  | -0.302385 |
| H | -6.651515  | -1.806200 | -0.827958 |
| H | -4.948535  | -2.007253 | -1.288379 |
| H | -5.423735  | -2.130380 | 0.404624  |
| H | -8.391328  | 1.477972  | -2.227864 |
| H | -9.678125  | 1.549406  | -1.009232 |
| H | -8.284242  | 2.632248  | -0.904239 |
| H | -7.769302  | -0.962856 | 1.036963  |
| H | -10.029683 | -1.722815 | 0.581187  |
| H | -10.421474 | -0.304786 | -0.375311 |
| H | -11.552848 | -0.237451 | 1.867865  |
| H | -9.972905  | -0.301096 | 2.668774  |
| H | -10.411076 | 1.110733  | 1.697250  |
| H | 8.999354   | 1.853086  | 0.284123  |
| H | 10.079380  | -0.203165 | 0.163112  |

**Enol conformer 2**



|                                             |              |
|---------------------------------------------|--------------|
| M06-2X/6-31G(d)-IEFPCM(water) Energy =      | -1079.126743 |
| M06-2X/6-31G(d)-IEFPCM(water) Free Energy = | -1078.755480 |
| M06-2X/6-311++G(d,p)-IEFPCM(water) Energy = | -1079.434937 |
| Number of Imaginary Frequencies =           | 0            |

M06-2X/6-31G(d)-IEFPCM(water) Geometry

|   |           |           |           |
|---|-----------|-----------|-----------|
| C | -8.183789 | 0.087937  | 0.133140  |
| C | -8.066141 | 1.443557  | 0.024991  |
| C | -6.772549 | 2.045961  | -0.080348 |
| O | -5.700285 | 1.171874  | -0.062527 |
| C | -5.816368 | -0.178280 | 0.044611  |
| C | -7.036097 | -0.781055 | 0.143913  |
| C | -4.530219 | -0.851185 | 0.039282  |
| C | -3.347900 | -0.205174 | -0.050428 |
| C | -2.072853 | -0.880014 | -0.051294 |
| C | -0.893836 | -0.222043 | -0.131147 |
| C | 0.395893  | -0.867892 | -0.128824 |
| C | 1.564637  | -0.191190 | -0.197867 |
| C | 2.866454  | -0.817810 | -0.190657 |
| C | 4.017637  | -0.111826 | -0.241442 |
| C | 5.369679  | -0.663515 | -0.215329 |
| C | 6.391314  | 0.228511  | -0.200032 |
| C | 7.846340  | 0.063779  | -0.101796 |
| C | 8.600389  | 1.154297  | -0.350081 |
| C | 10.097606 | 1.254204  | -0.289898 |
| C | 10.570360 | 1.832479  | 1.051704  |
| C | 8.468029  | -1.246895 | 0.322093  |
| C | 5.484340  | -2.167166 | -0.217596 |
| C | -7.266995 | -2.260866 | 0.263778  |
| O | -6.512457 | 3.227377  | -0.182564 |
| O | -9.363227 | -0.542547 | 0.237438  |
| H | -7.893735 | -2.614923 | -0.560392 |
| H | -6.338595 | -2.829198 | 0.253174  |
| H | -7.797431 | -2.489787 | 1.193122  |
| H | -4.539843 | -1.932821 | 0.115024  |
| H | -3.336823 | 0.880483  | -0.124559 |
| H | -2.076622 | -1.967613 | 0.018911  |
| H | -0.901953 | 0.866535  | -0.199617 |
| H | 0.411174  | -1.956052 | -0.064367 |
| H | 1.539555  | 0.897664  | -0.260258 |

|   |            |           |           |
|---|------------|-----------|-----------|
| H | 2.886426   | -1.904803 | -0.131380 |
| H | 3.945571   | 0.975599  | -0.286654 |
| H | 6.092204   | 1.275382  | -0.267829 |
| H | 6.494645   | -2.516548 | -0.411395 |
| H | 5.148275   | -2.590228 | 0.736701  |
| H | 4.836754   | -2.583462 | -0.996393 |
| H | 8.543586   | -1.958038 | -0.507870 |
| H | 9.474382   | -1.092798 | 0.716145  |
| H | 7.874518   | -1.718667 | 1.109859  |
| H | 8.082238   | 2.082930  | -0.592827 |
| H | 10.439858  | 1.907948  | -1.100267 |
| H | 10.566104  | 0.280006  | -0.457648 |
| H | 11.657821  | 1.949841  | 1.067462  |
| H | 10.118362  | 2.812780  | 1.232082  |
| H | 10.282129  | 1.173945  | 1.877113  |
| H | -8.927650  | 2.100183  | 0.015268  |
| H | -10.088795 | 0.103134  | 0.227177  |

**Pyrone-polyene 11, conformer 1**

|                                             |              |
|---------------------------------------------|--------------|
| M06-2X/6-31G(d)-IEFPCM(water) Energy =      | -1118.410291 |
| M06-2X/6-31G(d)-IEFPCM(water) Free Energy = | -1118.013022 |
| M06-2X/6-311++G(d,p)-IEFPCM(water) Energy = | -1118.722816 |
| Number of Imaginary Frequencies =           | 0            |

M06-2X/6-31G(d)-IEFPCM(water) Geometry

|   |           |           |           |
|---|-----------|-----------|-----------|
| C | -7.742345 | 0.050712  | 0.103381  |
| C | -7.629795 | 1.408781  | -0.001290 |
| C | -6.334221 | 2.014049  | -0.101913 |
| O | -5.256553 | 1.151013  | -0.082866 |
| C | -5.366526 | -0.201382 | 0.021133  |
| C | -6.582134 | -0.809559 | 0.114812  |
| C | -4.075405 | -0.865806 | 0.018952  |
| C | -2.896700 | -0.213232 | -0.067430 |
| C | -1.618257 | -0.882404 | -0.064236 |
| C | -0.441195 | -0.220914 | -0.141168 |
| C | 0.850184  | -0.863883 | -0.134238 |
| C | 2.018206  | -0.185883 | -0.200904 |
| C | 3.320557  | -0.811615 | -0.188954 |
| C | 4.471768  | -0.105692 | -0.238369 |
| C | 5.823764  | -0.657487 | -0.207868 |

|   |            |           |           |
|---|------------|-----------|-----------|
| C | 6.845691   | 0.234167  | -0.193747 |
| C | 8.300569   | 0.069137  | -0.093015 |
| C | 9.055576   | 1.157973  | -0.345546 |
| C | 10.552829  | 1.257095  | -0.284585 |
| C | 11.025133  | 1.841403  | 1.054532  |
| C | 8.921055   | -1.239875 | 0.337817  |
| C | 5.938074   | -2.161164 | -0.205305 |
| C | -6.800551  | -2.291655 | 0.229881  |
| O | -6.084471  | 3.198092  | -0.201165 |
| O | -8.901248  | -0.607628 | 0.204039  |
| H | -7.422422  | -2.648701 | -0.596532 |
| H | -5.866950  | -2.851371 | 0.219732  |
| H | -7.331576  | -2.528006 | 1.156879  |
| H | -4.077925  | -1.947475 | 0.094610  |
| H | -2.890707  | 0.872413  | -0.141752 |
| H | -1.618089  | -1.970014 | 0.006811  |
| H | -0.451984  | 0.867567  | -0.210714 |
| H | 0.867143   | -1.951964 | -0.068185 |
| H | 1.992298   | 0.902844  | -0.265106 |
| H | 3.340765   | -1.898497 | -0.127388 |
| H | 4.399903   | 0.981637  | -0.286238 |
| H | 6.547123   | 1.280932  | -0.265548 |
| H | 6.949015   | -2.511449 | -0.394068 |
| H | 5.598083   | -2.581341 | 0.748869  |
| H | 5.293436   | -2.579572 | -0.985438 |
| H | 8.998267   | -1.954659 | -0.488868 |
| H | 9.926610   | -1.084303 | 0.733350  |
| H | 8.325740   | -1.708104 | 1.126334  |
| H | 8.538279   | 2.085785  | -0.593222 |
| H | 10.896140  | 1.906710  | -1.097831 |
| H | 11.020720  | 0.281774  | -0.447425 |
| H | 12.112679  | 1.958010  | 1.070456  |
| H | 10.573798  | 2.822907  | 1.229967  |
| H | 10.735880  | 1.187071  | 1.882917  |
| H | -8.477678  | 2.078450  | -0.013950 |
| C | -10.103657 | 0.154964  | 0.208083  |
| H | -10.206129 | 0.713997  | -0.726654 |
| H | -10.912689 | -0.566941 | 0.301117  |
| H | -10.117268 | 0.844089  | 1.057649  |

**Pyrone-polyene 11, conformer 2**

|                                             |              |
|---------------------------------------------|--------------|
| M06-2X/6-31G(d)-IEFPCM(water) Energy =      | -1118.411018 |
| M06-2X/6-31G(d)-IEFPCM(water) Free Energy = | -1118.014574 |
| M06-2X/6-311++G(d,p)-IEFPCM(water) Energy = | -1118.723365 |
| Number of Imaginary Frequencies =           | 0            |

M06-2X/6-31G(d)-IEFPCM(water) Geometry

|   |            |           |           |
|---|------------|-----------|-----------|
| C | 7.729913   | -0.117170 | 0.095788  |
| C | 7.665018   | 1.244333  | 0.196989  |
| C | 6.390377   | 1.899609  | 0.220917  |
| O | 5.283120   | 1.080020  | 0.132774  |
| C | 5.345134   | -0.275830 | 0.033402  |
| C | 6.539254   | -0.931367 | 0.012408  |
| C | 4.029332   | -0.885930 | -0.043411 |
| C | 2.879061   | -0.179485 | -0.037163 |
| C | 1.570903   | -0.783941 | -0.115806 |
| C | 0.430071   | -0.058218 | -0.121250 |
| C | -0.894273  | -0.625758 | -0.199714 |
| C | -2.019569  | 0.122835  | -0.215039 |
| C | -3.356629  | -0.421186 | -0.292474 |
| C | -4.461226  | 0.354999  | -0.310207 |
| C | -5.841856  | -0.116337 | -0.375043 |
| C | -6.826117  | 0.811473  | -0.322860 |
| C | -8.284500  | 0.609151  | -0.327007 |
| C | -8.865250  | -0.353881 | 0.409730  |
| C | -10.336880 | -0.640945 | 0.524151  |
| C | -10.947428 | 0.021787  | 1.766057  |
| C | -9.052680  | 1.606928  | -1.161837 |
| C | -6.074091  | -1.597465 | -0.522806 |
| C | 6.705645   | -2.420818 | -0.093446 |
| O | 6.181345   | 3.092438  | 0.308913  |
| O | 8.865481   | -0.821465 | 0.063304  |
| H | 7.264154   | -2.802095 | 0.766721  |
| H | 5.751614   | -2.943342 | -0.139624 |
| H | 7.280344   | -2.677586 | -0.988390 |
| H | 3.988900   | -1.967381 | -0.111340 |
| H | 2.920762   | 0.905855  | 0.028591  |
| H | 1.517212   | -1.870871 | -0.174699 |
| H | 0.498525   | 1.028904  | -0.064062 |
| H | -0.972832  | -1.711916 | -0.250047 |
| H | -1.929893  | 1.208953  | -0.166516 |

|   |            |           |           |
|---|------------|-----------|-----------|
| H | -3.444270  | -1.505934 | -0.330506 |
| H | -4.328879  | 1.436322  | -0.255200 |
| H | -6.511970  | 1.857313  | -0.304004 |
| H | -7.102179  | -1.810506 | -0.818367 |
| H | -5.399268  | -2.011352 | -1.279200 |
| H | -5.873376  | -2.129946 | 0.414425  |
| H | -8.843949  | 1.467850  | -2.228657 |
| H | -10.131470 | 1.541399  | -1.010897 |
| H | -8.738870  | 2.626119  | -0.908365 |
| H | -8.220632  | -0.962258 | 1.044046  |
| H | -10.480236 | -1.725769 | 0.590740  |
| H | -10.873376 | -0.311311 | -0.370467 |
| H | -12.004852 | -0.237739 | 1.872532  |
| H | -10.424791 | -0.296891 | 2.673562  |
| H | -10.864598 | 1.111129  | 1.697238  |
| H | 8.535781   | 1.881000  | 0.261292  |
| C | 10.095329  | -0.108154 | 0.136826  |
| H | 10.162964  | 0.443408  | 1.079160  |
| H | 10.879178  | -0.861711 | 0.089179  |
| H | 10.189222  | 0.582639  | -0.706303 |

**5-*exo*-tet TS formic acid system, conformer 1**

|                                             |              |
|---------------------------------------------|--------------|
| M06-2X/6-31G(d)-IEFPCM(water) Energy =      | -1109.429332 |
| M06-2X/6-31G(d)-IEFPCM(water) Free Energy = | -1109.144622 |
| M06-2X/6-311++G(d,p)-IEFPCM(water) Energy = | -1109.807916 |
| Number of Imaginary Frequencies =           | 1 (-712.70)  |

M06-2X/6-31G(d)-IEFPCM(water) Geometry

|   |           |           |           |
|---|-----------|-----------|-----------|
| O | -0.530516 | -1.659941 | 0.232935  |
| C | 0.064498  | -0.915282 | -0.834163 |
| C | 1.566995  | -1.222168 | -0.651000 |
| C | 1.623302  | -0.915068 | 0.851964  |
| C | 0.393276  | -1.695313 | 1.348547  |
| C | -0.500564 | -1.376779 | -2.163640 |
| O | 1.892630  | -2.548656 | -0.983930 |
| C | 2.921497  | -1.242002 | 1.558130  |
| O | 1.291654  | 0.465543  | 0.926086  |
| C | -0.251763 | -1.153504 | 2.608149  |
| H | 0.675690  | -2.745470 | 1.508453  |

|   |           |           |           |
|---|-----------|-----------|-----------|
| H | 2.209185  | -0.555887 | -1.233859 |
| H | -1.590308 | -1.346912 | -2.136398 |
| H | -0.145993 | -0.724841 | -2.966571 |
| H | -0.166132 | -2.397540 | -2.362736 |
| H | 1.197502  | -3.125210 | -0.626004 |
| H | 2.824772  | -1.089064 | 2.637439  |
| H | 3.195188  | -2.283631 | 1.370074  |
| H | 3.715975  | -0.591006 | 1.182913  |
| H | 2.119923  | 1.020980  | 0.596800  |
| H | -1.188338 | -1.683037 | 2.802768  |
| H | 0.413013  | -1.307779 | 3.463991  |
| C | -1.257979 | 1.147343  | 0.085421  |
| C | -0.099793 | 0.572512  | -0.589487 |
| H | 0.537318  | 1.243162  | -1.162632 |
| H | -0.453853 | -0.084516 | 2.513150  |
| H | -1.817171 | 0.455990  | 0.719366  |
| C | -1.134874 | 2.506281  | 0.682570  |
| C | -1.689267 | 2.824021  | 1.849011  |
| H | -0.561702 | 3.236300  | 0.111602  |
| H | -2.268925 | 2.093047  | 2.408473  |
| O | -1.737939 | 1.135665  | -1.263831 |
| H | -2.613593 | 0.395418  | -1.315608 |
| H | -1.590303 | 3.814454  | 2.282003  |
| C | -4.292175 | -0.536403 | -0.354922 |
| O | -3.584490 | -0.420744 | -1.422253 |
| O | -4.117501 | 0.027196  | 0.722724  |
| H | -5.145207 | -1.234672 | -0.474420 |
| C | 3.354724  | 2.020265  | -1.049529 |
| H | 4.287551  | 2.523972  | -1.387673 |
| O | 2.473797  | 1.807402  | -1.896062 |
| O | 3.334633  | 1.731387  | 0.187149  |

**6-endo-tet TS formic acid system**

|                                             |              |
|---------------------------------------------|--------------|
| M06-2X/6-31G(d)-IEFPCM(water) Energy =      | -1109.432981 |
| M06-2X/6-31G(d)-IEFPCM(water) Free Energy = | -1109.144631 |
| M06-2X/6-311++G(d,p)-IEFPCM(water) Energy = | -1109.813660 |
| Number of Imaginary Frequencies =           | 1 (-544.61)  |

M06-2X/6-31G(d)-IEFPCM(water) Geometry

|   |           |           |           |
|---|-----------|-----------|-----------|
| O | 1.245022  | -1.748880 | 0.936213  |
| C | 0.363334  | -1.487797 | -0.168835 |
| C | 1.190175  | -0.647833 | -1.159572 |
| C | 2.115347  | 0.124953  | -0.195046 |
| C | 2.459594  | -0.997172 | 0.789823  |
| C | -0.166701 | -2.798061 | -0.718899 |
| O | 1.921456  | -1.520072 | -2.002625 |
| C | 3.324977  | 0.764394  | -0.858068 |
| O | 1.358198  | 1.116477  | 0.488864  |
| C | 2.959987  | -0.550786 | 2.147783  |
| H | 3.209500  | -1.642135 | 0.309951  |
| H | 0.555928  | 0.036661  | -1.736592 |
| H | 0.654049  | -3.414595 | -1.087399 |
| H | -0.697117 | -3.328408 | 0.076175  |
| H | -0.873036 | -2.604982 | -1.531811 |
| H | 2.309928  | -0.987873 | -2.711977 |
| H | 2.993520  | 1.528670  | -1.568365 |
| H | 3.950346  | 1.249066  | -0.102186 |
| H | 3.930055  | 0.020434  | -1.383156 |
| H | 1.066562  | 1.826833  | -0.201353 |
| H | 3.061820  | -1.412607 | 2.812702  |
| H | 3.942407  | -0.078710 | 2.048590  |
| C | -0.487136 | 0.365082  | 1.331648  |
| C | -0.790827 | -0.613202 | 0.300160  |
| H | -1.364526 | -0.221808 | -0.541505 |
| H | 2.275389  | 0.170897  | 2.599863  |
| H | 0.137772  | 0.014410  | 2.142142  |
| C | -1.238840 | 1.600733  | 1.486830  |
| C | -1.085772 | 2.344736  | 2.585944  |
| H | -1.873137 | 1.895627  | 0.656560  |
| H | -0.425968 | 2.030208  | 3.390915  |
| O | -1.630981 | -1.168208 | 1.306584  |
| H | -2.648145 | -0.834857 | 1.038748  |
| H | -1.603427 | 3.290104  | 2.712567  |
| C | -4.110080 | -0.651788 | -0.536871 |
| O | -3.828312 | -0.321595 | 0.668420  |
| O | -3.422212 | -1.318609 | -1.311429 |
| H | -5.095346 | -0.271115 | -0.881963 |
| C | -0.346649 | 2.739130  | -1.819771 |
| H | -0.601100 | 3.542040  | -2.550880 |

|   |           |          |           |
|---|-----------|----------|-----------|
| O | -1.155109 | 1.806562 | -1.689134 |
| O | 0.758198  | 2.909052 | -1.222115 |

**5-*exo*-tet TS formic acid system, conformer 2**

|                                             |              |
|---------------------------------------------|--------------|
| M06-2X/6-31G(d)-IEFPCM(water) Energy =      | -1109.428867 |
| M06-2X/6-31G(d)-IEFPCM(water) Free Energy = | -1109.142060 |
| M06-2X/6-311++G(d,p)-IEFPCM(water) Energy = | -1109.807172 |
| Number of Imaginary Frequencies =           | 1 (-727.23)  |

M06-2X/6-31G(d)-IEFPCM(water) Geometry

|   |           |           |           |
|---|-----------|-----------|-----------|
| O | -1.623099 | 0.999455  | -1.486653 |
| C | -0.571236 | 0.040447  | -1.361774 |
| C | -1.283408 | -1.205996 | -0.787373 |
| C | -2.048865 | -0.458567 | 0.304019  |
| C | -2.637999 | 0.704619  | -0.507290 |
| C | 0.093442  | -0.177180 | -2.703149 |
| O | -2.181924 | -1.796623 | -1.693048 |
| C | -3.045510 | -1.256928 | 1.115043  |
| O | -1.009188 | 0.093370  | 1.108228  |
| C | -2.970066 | 1.944955  | 0.298012  |
| H | -3.528845 | 0.345974  | -1.039345 |
| H | -0.572669 | -1.926917 | -0.363077 |
| H | -0.629453 | -0.623044 | -3.392345 |
| H | 0.435592  | 0.779361  | -3.099670 |
| H | 0.965594  | -0.825571 | -2.584752 |
| H | -1.683844 | -2.380221 | -2.283716 |
| H | -3.561869 | -0.609797 | 1.830691  |
| H | -3.785171 | -1.712930 | 0.451953  |
| H | -2.527685 | -2.044301 | 1.669547  |
| H | -0.610002 | -0.669165 | 1.729375  |
| H | -3.283144 | 2.751293  | -0.370800 |
| H | -3.791553 | 1.740150  | 0.992034  |
| C | 0.757548  | 1.875578  | -0.057803 |
| C | 0.381584  | 0.477449  | -0.264883 |
| H | 1.056202  | -0.274730 | 0.141129  |
| H | -2.098303 | 2.271275  | 0.870529  |
| H | 0.000675  | 2.593041  | -0.393568 |
| C | 1.315882  | 2.244067  | 1.279958  |
| C | 0.918108  | 3.314726  | 1.961625  |
| H | 2.077078  | 1.574119  | 1.679143  |



|   |           |           |           |
|---|-----------|-----------|-----------|
| H | 0.162896  | 3.988829  | 1.562633  |
| O | 1.699804  | 1.586583  | -1.077348 |
| H | 2.698930  | 0.956698  | -0.582860 |
| H | 1.326471  | 3.557815  | 2.937818  |
| C | 3.669975  | -0.822236 | -0.539658 |
| O | 3.513655  | 0.364997  | -0.034590 |
| O | 3.167184  | -1.254180 | -1.564600 |
| H | 4.352558  | -1.446835 | 0.064261  |
| C | 0.861168  | -2.340336 | 2.176412  |
| H | 1.210418  | -3.154745 | 2.849092  |
| O | 1.479615  | -2.153713 | 1.119689  |
| O | -0.153249 | -1.706625 | 2.609959  |

#### Acid-catalyzed C-O bond cleavage TS

|                                             |             |
|---------------------------------------------|-------------|
| M06-2X/6-31G(d)-IEFPCM(water) Energy =      | -730.918124 |
| M06-2X/6-31G(d)-IEFPCM(water) Free Energy = | -730.663466 |
| M06-2X/6-311++G(d,p)-IEFPCM(water) Energy = | -731.151952 |
| Number of Imaginary Frequencies =           | 1 (-86.20)  |

#### M06-2X/6-31G(d)-IEFPCM(water) Geometry

|   |           |           |           |
|---|-----------|-----------|-----------|
| O | -0.216005 | -0.082715 | 1.248663  |
| C | 0.030569  | 0.934691  | 0.283923  |
| C | -0.648523 | 0.400626  | -0.989343 |
| C | -1.824752 | -0.483666 | -0.459414 |
| C | -1.565668 | -0.542712 | 1.072261  |
| C | -0.500872 | 2.289633  | 0.737678  |
| O | -0.999278 | 1.470333  | -1.824912 |
| C | -3.190234 | 0.101787  | -0.770152 |
| O | -1.808621 | -1.760678 | -1.075583 |
| C | -1.706442 | -1.904749 | 1.712040  |
| H | -2.237407 | 0.169184  | 1.570099  |
| H | 0.045707  | -0.279388 | -1.511908 |
| H | -0.008579 | 2.584517  | 1.668278  |
| H | -0.310728 | 3.045462  | -0.026562 |
| H | -1.578558 | 2.247534  | 0.912780  |
| H | -1.280731 | 1.111230  | -2.679889 |
| H | -3.370125 | 0.089728  | -1.848090 |
| H | -3.267311 | 1.131973  | -0.415971 |
| H | -3.962911 | -0.501398 | -0.283757 |
| H | -0.957890 | -2.189540 | -0.895089 |

|   |           |           |           |
|---|-----------|-----------|-----------|
| H | -1.528652 | -1.831302 | 2.787478  |
| H | -2.715847 | -2.290599 | 1.548468  |
| C | 2.236140  | -0.300349 | -0.089909 |
| C | 1.547449  | 0.984890  | 0.168801  |
| H | 1.897942  | 1.811273  | -0.450350 |
| H | -0.989981 | -2.614413 | 1.290244  |
| H | 1.788760  | -1.177913 | 0.377878  |
| C | 3.465399  | -0.417631 | -0.755428 |
| C | 4.027720  | -1.652030 | -0.836160 |
| H | 3.912488  | 0.447985  | -1.232808 |
| H | 3.571716  | -2.509388 | -0.348761 |
| O | 2.178650  | 1.063432  | 1.453253  |
| H | 4.939022  | -1.824511 | -1.399943 |
| H | 1.590393  | 0.593645  | 2.080747  |

#### Alkoxide conformer 1

|                                             |              |
|---------------------------------------------|--------------|
| M06-2X/6-31G(d)-IEFPCM(water) Energy =      | -1078.658639 |
| M06-2X/6-31G(d)-IEFPCM(water) Free Energy = | -1078.302257 |
| M06-2X/6-311++G(d,p)-IEFPCM(water) Energy = | -1078.977105 |
| Number of Imaginary Frequencies =           | 0            |

#### M06-2X/6-31G(d)-IEFPCM(water) Geometry

|   |           |           |           |
|---|-----------|-----------|-----------|
| C | 8.308580  | -0.228763 | 0.135989  |
| C | 8.201073  | 1.177409  | 0.248479  |
| C | 6.976435  | 1.862442  | 0.260111  |
| O | 5.820345  | 1.078734  | 0.147298  |
| C | 5.859508  | -0.279427 | 0.041893  |
| C | 7.027069  | -0.969615 | 0.031096  |
| C | 4.523677  | -0.856215 | -0.050255 |
| C | 3.386681  | -0.130843 | -0.051050 |
| C | 2.067993  | -0.716716 | -0.136946 |
| C | 0.930096  | 0.012093  | -0.146340 |
| C | -0.395580 | -0.555590 | -0.225376 |
| C | -1.525653 | 0.184929  | -0.242188 |
| C | -2.859003 | -0.370989 | -0.314263 |
| C | -3.973184 | 0.390882  | -0.331522 |
| C | -5.348555 | -0.098592 | -0.385632 |
| C | -6.346055 | 0.814786  | -0.334784 |
| C | -7.801596 | 0.590892  | -0.327504 |
| C | -8.363901 | -0.371438 | 0.424233  |

|   |            |           |           |
|---|------------|-----------|-----------|
| C | -9.830282  | -0.679538 | 0.552024  |
| C | -10.442312 | -0.012338 | 1.790787  |
| C | -8.589317  | 1.566936  | -1.169774 |
| C | -5.561775  | -1.583887 | -0.520645 |
| C | 7.146280   | -2.460415 | -0.081759 |
| O | 6.762754   | 3.070853  | 0.355078  |
| O | 9.387093   | -0.865637 | 0.121805  |
| H | 7.700051   | -2.853732 | 0.777003  |
| H | 6.186823   | -2.974404 | -0.140140 |
| H | 7.733606   | -2.721921 | -0.968120 |
| H | 4.457254   | -1.937284 | -0.121123 |
| H | 3.447699   | 0.953367  | 0.017337  |
| H | 2.004448   | -1.803890 | -0.195645 |
| H | 0.999884   | 1.099193  | -0.089628 |
| H | -0.470626  | -1.642591 | -0.272592 |
| H | -1.444598  | 1.271894  | -0.197056 |
| H | -2.935199  | -1.457027 | -0.346638 |
| H | -3.854618  | 1.474160  | -0.282835 |
| H | -6.047389  | 1.865331  | -0.325782 |
| H | -6.589515  | -1.813441 | -0.804695 |
| H | -4.888199  | -1.993992 | -1.280270 |
| H | -5.344540  | -2.106634 | 0.418391  |
| H | -8.381408  | 1.420424  | -2.235781 |
| H | -9.666458  | 1.485006  | -1.014808 |
| H | -8.291869  | 2.593868  | -0.927929 |
| H | -7.706336  | -0.962810 | 1.061452  |
| H | -9.956698  | -1.765619 | 0.631806  |
| H | -10.378377 | -0.368471 | -0.342193 |
| H | -11.494684 | -0.287234 | 1.908432  |
| H | -9.907849  | -0.312175 | 2.697834  |
| H | -10.377207 | 1.077319  | 1.709005  |
| H | 9.103197   | 1.773058  | 0.331085  |

**Alkoxide conformer 2**

|                                             |              |
|---------------------------------------------|--------------|
| M06-2X/6-31G(d)-IEFPCM(water) Energy =      | -1078.657858 |
| M06-2X/6-31G(d)-IEFPCM(water) Free Energy = | -1078.300274 |
| M06-2X/6-311++G(d,p)-IEFPCM(water) Energy = | -1078.976507 |
| Number of Imaginary Frequencies =           | 0            |

M06-2X/6-31G(d)-IEFPCM(water) Geometry

|   |           |           |           |
|---|-----------|-----------|-----------|
| C | -8.329517 | 0.013324  | 0.109760  |
| C | -8.148979 | 1.413650  | 0.022416  |
| C | -6.890812 | 2.030946  | -0.050875 |
| O | -5.776386 | 1.181303  | -0.036947 |
| C | -5.886197 | -0.174451 | 0.044648  |
| C | -7.087946 | -0.799225 | 0.117951  |
| C | -4.582452 | -0.827306 | 0.041215  |
| C | -3.407107 | -0.169664 | -0.032353 |
| C | -2.123025 | -0.833398 | -0.031459 |
| C | -0.944502 | -0.175440 | -0.101331 |
| C | 0.346366  | -0.822692 | -0.097789 |
| C | 1.518834  | -0.153408 | -0.163730 |
| C | 2.817810  | -0.788380 | -0.157574 |
| C | 3.974835  | -0.093185 | -0.213389 |
| C | 5.323264  | -0.655719 | -0.191780 |
| C | 6.353375  | 0.226164  | -0.191162 |
| C | 7.808213  | 0.048523  | -0.105715 |
| C | 8.570781  | 1.126993  | -0.378195 |
| C | 10.069564 | 1.213311  | -0.337278 |
| C | 10.564306 | 1.822799  | 0.982184  |
| C | 8.420874  | -1.262081 | 0.332002  |
| C | 5.425437  | -2.160305 | -0.184687 |
| C | -7.282408 | -2.283860 | 0.206287  |
| O | -6.615659 | 3.228225  | -0.126483 |
| O | -9.440124 | -0.562088 | 0.179637  |
| H | -7.859394 | -2.637990 | -0.654683 |
| H | -6.349544 | -2.845818 | 0.249550  |
| H | -7.876218 | -2.527650 | 1.092784  |
| H | -4.574276 | -1.910932 | 0.102432  |
| H | -3.407681 | 0.916625  | -0.094976 |
| H | -2.121527 | -1.922228 | 0.031088  |
| H | -0.951497 | 0.913618  | -0.163339 |
| H | 0.357830  | -1.911519 | -0.036384 |
| H | 1.500906  | 0.935752  | -0.224251 |
| H | 2.829518  | -1.875651 | -0.096679 |
| H | 3.912204  | 0.994772  | -0.261255 |
| H | 6.063647  | 1.275346  | -0.264651 |
| H | 6.432142  | -2.519533 | -0.379453 |
| H | 5.088711  | -2.574449 | 0.773298  |
| H | 4.771609  | -2.576150 | -0.958532 |

|   |           |           |           |
|---|-----------|-----------|-----------|
| H | 8.488010  | -1.984129 | -0.489298 |
| H | 9.429833  | -1.111397 | 0.720882  |
| H | 7.826115  | -1.719413 | 1.127296  |
| H | 8.059432  | 2.057163  | -0.629672 |
| H | 10.408379 | 1.841643  | -1.169077 |
| H | 10.526943 | 0.230606  | -0.484712 |
| H | 11.652827 | 1.931381  | 0.981337  |
| H | 10.122677 | 2.811359  | 1.142198  |
| H | 10.281165 | 1.188969  | 1.828384  |
| H | -9.018769 | 2.060517  | 0.013184  |
